# Supplementary material for: Identifying the Mechanism of Polygoni Cuspidati Rhizoma et Radix in Treating Acute Liver Failure Based on Network Pharmacology and Molecular Docking
Source: Hindawi journal article supplement (doi:10.1155/2022/2021066), 2022-04-08
Supplement: f1 [file 2021066.f1.zip]

## Supplementary file

Table S4. Gene ontology functional enrichment analysis

| Term_ID    | Term_description                                                      | ListHit | ListTotal | PopHit | PopTotal | GeneRatio | BgRatio | Enrichment_score | GeneIds                                                                                   | GeneSymbols                                                                                                         | p-value     | FDR_bh      | Category           |
|------------|-----------------------------------------------------------------------|---------|-----------|--------|----------|-----------|---------|------------------|-------------------------------------------------------------------------------------------|---------------------------------------------------------------------------------------------------------------------|-------------|-------------|--------------------|
| GO:0005737 | cytoplasm                                                             | 19      | 30        | 3289   | 14857    | 0.6       | 0.221   | 2.8608797        | 351;5294;760;5468;4780;5578;10499;9970;860;196;5728;840;7153;3320;332;1432;7422;1017;5921 | APP;PIK3CG;CA2;PPARG;NF E2L2;PRKCA;NCOA2;NR1I3; RUNX2;AHR;PTEN;CASP7;T OP2A;HSP90AA1;BIRC5;MA PK14;VEGFA;CDK2;RASA1 | 1.44E-06    | 0.000128399 | cellular_component |
| GO:0043536 | positive regulation of blood vessel endothelial cell migration        | 3       | 30        | 14     | 13332    | 0.1       | 0.001   | 95.22857143      | 5578;7422;4780                                                                            | PRKCA;VEGFA;NFE2L2                                                                                                  | 3.68E-06    | 0.000845272 | biological_process |
| GO:0045931 | positive regulation of mitotic cell cycle                             | 3       | 30        | 15     | 13332    | 0.1       | 0.001   | 88.88            | 351;5578;332                                                                              | APP;PRKCA;BIRC5                                                                                                     | 4.59E-06    | 0.000845272 | biological_process |
| GO:0045944 | positive regulation of transcription from RNA polymerase II promoter  | 8       | 30        | 588    | 13332    | 0.3       | 0.044   | 6.046258503      | 860;7153;5468;1432;7422;4780;196;10499                                                    | RUNX2;TOP2A;PPARG;MAP K14;VEGFA;NFE2L2;AHR;N COA2                                                                   | 3.37E-05    | 0.003847452 | biological_process |
| GO:0019904 | protein domain specific binding                                       | 5       | 30        | 174    | 12391    | 0.2       | 0.014   | 11.86877395      | 860;6331;4780;10499;1017                                                                  | RUNX2;SCN5A;NFE2L2;NC OA2;CDK2                                                                                      | 5.53E-05    | 0.004598256 | molecular_function |
| GO:0048010 | vascular endothelial growth factor receptor signaling pathway         | 3       | 30        | 35     | 13332    | 0.1       | 0.003   | 38.09142857      | 3320;7422;1432                                                                            | HSP90AA1;VEGFA;MAPK14                                                                                               | 6.41E-05    | 0.003847452 | biological_process |
| GO:0060373 | regulation of ventricular cardiac muscle cell membrane depolarization | 2       | 30        | 6      | 13332    | 0.1       | 0.000   | 148.1333333      | 6331;2697                                                                                 | SCN5A;GJA1                                                                                                          | 7.30E-05    | 0.003847452 | biological_process |
| GO:0042475 | odontogenesis of dentin-containing tooth                              | 3       | 30        | 38     | 13332    | 0.1       | 0.003   | 35.08421053      | 860;6331;760                                                                              | RUNX2;SCN5A;CA2                                                                                                     | 8.22E-05    | 0.003847452 | biological_process |
| GO:0003707 | steroid hormone receptor activity                                     | 3       | 30        | 36     | 12391    | 0.1       | 0.003   | 34.41944444      | 5468;9970;6256                                                                            | PPARG;NR1I3;RXRA                                                                                                    | 8.66E-05    | 0.004598256 | molecular_function |
| GO:0006915 | apoptotic process                                                     | 6       | 30        | 336    | 13332    | 0.2       | 0.025   | 7.935714286      | 351;1432;2697;196;5728;840                                                                | APP;MAPK14;GJA1;AHR;PT EN;CASP7                                                                                     | 8.72E-05    | 0.003847452 | biological_process |
| GO:0030278 | regulation of ossification                                            | 2       | 30        | 7      | 13332    | 0.1       | 0.001   | 126.9714286      | 860;1432                                                                                  | RUNX2;MAPK14                                                                                                        | 0.000102079 | 0.003847452 | biological_process |
| GO:0051923 | sulfation                                                             | 2       | 30        | 7      | 13332    | 0.1       | 0.001   | 126.9714286      | 6818;6817                                                                                 | SULT1A3;SULT1A1                                                                                                     | 0.000102079 | 0.003847452 | biological_process |
| GO:0097110 | scaffold protein binding                                              | 3       | 30        | 39     | 12391    | 0.1       | 0.003   | 31.77179487      | 3320;6331;2697                                                                            | HSP90AA1;SCN5A;GJA1                                                                                                 | 0.000110358 | 0.004598256 | molecular_function |
| GO:0006805 | xenobiotic metabolic process                                          | 3       | 30        | 42     | 13332    | 0.1       | 0.003   | 31.74285714      | 6818;196;6817                                                                             | SULT1A3;AHR;SULT1A1                                                                                                 | 0.00011125  | 0.003847452 | biological_process |
| GO:0071498 | cellular response to fluid shear stress                               | 2       | 30        | 8      | 13332    | 0.1       | 0.001   | 111.1            | 760;4780                                                                                  | CA2;NFE2L2                                                                                                          | 0.000135915 | 0.003847452 | biological_process |
| GO:0060371 | regulation of atrial cardiac muscle cell membrane depolarization      | 2       | 30        | 8      | 13332    | 0.1       | 0.001   | 111.1            | 6331;2697                                                                                 | SCN5A;GJA1                                                                                                          | 0.000135915 | 0.003847452 | biological_process |
| GO:0086014 | atrial cardiac muscle cell action potential                           | 2       | 30        | 8      | 13332    | 0.1       | 0.001   | 111.1            | 6331;2697                                                                                 | SCN5A;GJA1                                                                                                          | 0.000135915 | 0.003847452 | biological_process |
| GO:1990782 | protein tyrosine kinase binding                                       | 2       | 30        | 8      | 12391    | 0.1       | 0.001   | 103.2583333      | 3320;2697                                                                                 | HSP90AA1;GJA1                                                                                                       | 0.000157243 | 0.004913849 | molecular_function |
| GO:0048514 | blood vessel morphogenesis                                            | 2       | 30        | 10     | 13332    | 0.1       | 0.001   | 88.88            | 2697;5921                                                                                 | GJA1;RASA1                                                                                                          | 0.000217825 | 0.005009967 | biological_process |
| GO:0045780 | positive regulation of bone resorption                                | 2       | 30        | 10     | 13332    | 0.1       | 0.001   | 88.88            | 5578;760                                                                                  | PRKCA;CA2                                                                                                           | 0.000217825 | 0.005009967 | biological_process |
| GO:0006068 | ethanol catabolic process                                             | 2       | 30        | 10     | 13332    | 0.1       | 0.001   | 88.88            | 6818;6817                                                                                 | SULT1A3;SULT1A1                                                                                                     | 0.000217825 | 0.005009967 | biological_process |
| GO:0004062 | aryl sulfotransferase activity                                        | 2       | 30        | 10     | 12391    | 0.1       | 0.001   | 82.60666667      | 6818;6817                                                                                 | SULT1A3;SULT1A1                                                                                                     | 0.000251952 | 0.006298798 | molecular_function |
| GO:0060307 | regulation of ventricular cardiac muscle cell membrane repolarization | 2       | 30        | 11     | 13332    | 0.1       | 0.001   | 80.8             | 6331;2697                                                                                 | SCN5A;GJA1                                                                                                          | 0.000265858 | 0.005755037 | biological_process |
| GO:0042629 | mast cell granule                                                     | 2       | 30        | 13     | 14857    | 0.1       | 0.001   | 76.18974359      | 5294;231                                                                                  | PIK3CG;AKR1B1                                                                                                       | 0.000303234 | 0.013493893 | cellular_component |
| GO:0045766 | positive regulation of angiogenesis                                   | 3       | 30        | 59     | 13332    | 0.1       | 0.004   | 22.59661017      | 5578;7422;4780                                                                            | PRKCA;VEGFA;NFE2L2                                                                                                  | 0.000307015 | 0.006276744 | biological_process |
| GO:0001525 | angiogenesis                                                          | 4       | 30        | 150    | 13332    | 0.1       | 0.011   | 11.85066667      | 5578;5294;7422;1432                                                                       | PRKCA;PIK3CG;VEGFA;MA PK14                                                                                          | 0.00033597  | 0.0065072   | biological_process |
| GO:0044212 | transcription regulatory region DNA binding                           | 4       | 30        | 143    | 12391    | 0.1       | 0.012   | 11.55337995      | 860;196;5468;4780                                                                         | RUNX2;AHR;PPARG;NFE2L 2                                                                                             | 0.00036912  | 0.007689991 | molecular_function |
| GO:0035924 | cellular response to vascular endothelial growth factor stimulus      | 2       | 30        | 13     | 13332    | 0.1       | 0.001   | 68.36923077      | 7422;1432                                                                                 | VEGFA;MAPK14                                                                                                        | 0.000375981 | 0.006588611 | biological_process |
| GO:2000379 | positive regulation of reactive oxygen species metabolic process      | 2       | 30        | 13     | 13332    | 0.1       | 0.001   | 68.36923077      | 1432;4780                                                                                 | MAPK14;NFE2L2                                                                                                       | 0.000375981 | 0.006588611 | biological_process |
| GO:0000793 | condensed chromosome                                                  | 2       | 30        | 16     | 14857    | 0.1       | 0.001   | 61.90416667      | 7153;1017                                                                                 | TOP2A;CDK2                                                                                                          | 0.000464759 | 0.013787849 | cellular_component |
| GO:0097718 | disordered domain specific binding                                    | 2       | 30        | 14     | 12391    | 0.1       | 0.001   | 59.0047619       | 3320;2697                                                                                 | HSP90AA1;GJA1                                                                                                       | 0.000506443 | 0.00904362  | molecular_function |
| GO:0046326 | positive regulation of glucose import                                 | 2       | 30        | 17     | 13332    | 0.1       | 0.001   | 52.28235294      | 1432;4780                                                                                 | MAPK14;NFE2L2                                                                                                       | 0.000651897 | 0.01043035  | biological_process |
| GO:0050427 | 3'-phosphoadenosine 5'-phosphosulfate metabolic process               | 2       | 30        | 17     | 13332    | 0.1       | 0.001   | 52.28235294      | 6818;6817                                                                                 | SULT1A3;SULT1A1                                                                                                     | 0.000651897 | 0.01043035  | biological_process |
| GO:0038128 | ERBB2 signaling pathway                                               | 2       | 30        | 18     | 13332    | 0.1       | 0.001   | 49.37777778      | 3320;5578                                                                                 | HSP90AA1;PRKCA                                                                                                      | 0.000732359 | 0.011229502 | biological_process |
| GO:0032526 | response to retinoic acid                                             | 2       | 30        | 20     | 13332    | 0.1       | 0.002   | 44.44            | 2697;5468                                                                                 | GJA1;PPARG                                                                                                          | 0.000906925 | 0.013349935 | biological_process |
| GO:0043234 | protein complex                                                       | 5       | 30        | 395    | 14857    | 0.2       | 0.027   | 6.268776371      | 860;7153;3320;196;10499                                                                   | RUNX2;TOP2A;HSP90AA1;A HR;NCOA2                                                                                     | 0.001066493 | 0.022950876 | cellular_component |
| GO:0004879 | nuclear receptor activity                                             | 2       | 30        | 21     | 12391    | 0.1       | 0.002   | 39.33650794      | 196;5468                                                                                  | AHR;PPARG                                                                                                           | 0.001156467 | 0.017641686 | molecular_function |
| GO:0008146 | sulfotransferase activity                                             | 2       | 30        | 22     | 12391    | 0.1       | 0.002   | 37.54848485      | 6818;6817                                                                                 | SULT1A3;SULT1A1                                                                                                     | 0.001270201 | 0.017641686 | molecular_function |
| GO:0005654 | nucleoplasm                                                           | 12      | 30        | 2356   | 14857    | 0.4       | 0.159   | 2.522410866      | 860;7153;10499;3320;862;4780;2697;5578;196;840;231;1017                                   | RUNX2;TOP2A;NCOA2;HSP 90AA1;RUNX1T1;NFE2L2;GJ A1;PRKCA;AHR;CASP7;AKR 1B1;CDK2                                       | 0.001289375 | 0.022950876 | cellular_component |
| GO:0010595 | positive regulation of endothelial cell migration                     | 2       | 30        | 24     | 13332    | 0.1       | 0.002   | 37.03333333      | 5578;7422                                                                                 | PRKCA;VEGFA                                                                                                         | 0.001310081 | 0.017855919 | biological_process |
| GO:0002062 | chondrocyte differentiation                                           | 2       | 30        | 24     | 13332    | 0.1       | 0.002   | 37.03333333      | 860;1432                                                                                  | RUNX2;MAPK14                                                                                                        | 0.001310081 | 0.017855919 | biological_process |

| Term_ID    | Term_description                                                     | ListHit | ListTotal | PopHit | PopTotal | GeneRatio | BgRatio | Enrichment_score | Genelds                                                              | GeneSymbols                                                                                     | p-value     | FDR_bh      | Category           |
|------------|----------------------------------------------------------------------|---------|-----------|--------|----------|-----------|---------|------------------|----------------------------------------------------------------------|-------------------------------------------------------------------------------------------------|-------------|-------------|--------------------|
| GO:0018105 | peptidyl-serine phosphorylation                                      | 3       | 30        | 103    | 13332    | 0.1       | 0.008   | 12.94368932      | 5578;1017;1432                                                       | PRKCA;CDK2;MAPK14                                                                               | 0.001562458 | 0.020535159 | biological_process |
| GO:0045785 | positive regulation of cell adhesion                                 | 2       | 30        | 27     | 13332    | 0.1       | 0.002   | 32.91851852      | 5578;7422                                                            | PRKCA;VEGFA                                                                                     | 0.001659111 | 0.021053547 | biological_process |
| GO:0051020 | GTPase binding                                                       | 2       | 30        | 26     | 12391    | 0.1       | 0.002   | 31.77179487      | 3320;5921                                                            | HSP90AA1;RASA1                                                                                  | 0.001776364 | 0.022204544 | molecular_function |
| GO:0006468 | protein phosphorylation                                              | 4       | 30        | 235    | 13332    | 0.1       | 0.018   | 7.564255319      | 351;5578;1017;332                                                    | APP;PRKCA;CDK2;BIRC5                                                                            | 0.001798793 | 0.022065195 | biological_process |
| GO:0042752 | regulation of circadian rhythm                                       | 2       | 30        | 29     | 13332    | 0.1       | 0.002   | 30.64827586      | 7153;5468                                                            | TOP2A;PPARG                                                                                     | 0.001913731 | 0.02271784  | biological_process |
| GO:0043406 | positive regulation of MAP kinase activity                           | 2       | 30        | 30     | 13332    | 0.1       | 0.002   | 29.62666667      | 5294;7422                                                            | PIK3CG;VEGFA                                                                                    | 0.002047564 | 0.022833443 | biological_process |
| GO:0001938 | positive regulation of endothelial cell proliferation                | 2       | 30        | 30     | 13332    | 0.1       | 0.002   | 29.62666667      | 5578;7422                                                            | PRKCA;VEGFA                                                                                     | 0.002047564 | 0.022833443 | biological_process |
| GO:0005667 | transcription factor complex                                         | 3       | 30        | 127    | 14857    | 0.1       | 0.009   | 11.6984252       | 860;196;1017                                                         | RUNX2;AHR;CDK2                                                                                  | 0.00209226  | 0.027950069 | cellular_component |
| GO:0016328 | lateral plasma membrane                                              | 2       | 30        | 35     | 14857    | 0.1       | 0.002   | 28.29904762      | 6331;2697                                                            | SCN5A;GJA1                                                                                      | 0.002250162 | 0.027950069 | cellular_component |
| GO:0032922 | circadian regulation of gene expression                              | 2       | 30        | 33     | 13332    | 0.1       | 0.002   | 26.93333333      | 10499;196                                                            | NCOA2;AHR                                                                                       | 0.002474929 | 0.02678747  | biological_process |
| GO:0014704 | intercalated disc                                                    | 2       | 30        | 37     | 14857    | 0.1       | 0.002   | 26.76936937      | 6331;2697                                                            | SCN5A;GJA1                                                                                      | 0.002512366 | 0.027950069 | cellular_component |
| GO:0045669 | positive regulation of osteoblast differentiation                    | 2       | 30        | 34     | 13332    | 0.1       | 0.003   | 26.14117647      | 860;2697                                                             | RUNX2;GJA1                                                                                      | 0.002625944 | 0.027609923 | biological_process |
| GO:0048511 | rhythmic process                                                     | 2       | 30        | 36     | 13332    | 0.1       | 0.003   | 24.68888889      | 7153;5468                                                            | TOP2A;PPARG                                                                                     | 0.0029407   | 0.030060487 | biological_process |
| GO:0005829 | cytosol                                                              | 15      | 30        | 3743   | 14857    | 0.5       | 0.252   | 1.984637991      | 860;5294;760;332;1432;3320;4780;6817;2697;5578;196;840;231;5921;6818 | RUNX2;PIK3CG;CA2;BIRC5;MAPK14;HSP90AA1;NFE2L2;SULT1A1;GJA1;PRKCA;AHR;CASP7;AKR1B1;RASA1;SULT1A3 | 0.002953741 | 0.029209218 | cellular_component |
| GO:0004672 | protein kinase activity                                              | 3       | 30        | 122    | 12391    | 0.1       | 0.010   | 10.15655738      | 5578;5294;1017                                                       | PRKCA;PIK3CG;CDK2                                                                               | 0.003114046 | 0.034466637 | molecular_function |
| GO:0008270 | zinc ion binding                                                     | 6       | 30        | 629    | 12391    | 0.2       | 0.051   | 3.93990461       | 332;760;5468;5578;6256;9970                                          | BIRC5;CA2;PPARG;PRKCA;RXRA;NR1I3                                                                | 0.003488726 | 0.034466637 | molecular_function |
| GO:0043066 | negative regulation of apoptotic process                             | 4       | 30        | 284    | 13332    | 0.1       | 0.021   | 6.25915493       | 7422;231;332;5921                                                    | VEGFA;AKR1B1;BIRC5;RASA1                                                                        | 0.003570581 | 0.035512804 | biological_process |
| GO:0003682 | chromatin binding                                                    | 4       | 30        | 266    | 12391    | 0.1       | 0.021   | 6.211027569      | 860;7153;10499;5468                                                  | RUNX2;TOP2A;NCOA2;PPARG                                                                         | 0.003666377 | 0.034466637 | molecular_function |
| GO:0003700 | DNA binding transcription factor activity                            | 6       | 30        | 642    | 12391    | 0.2       | 0.052   | 3.860124611      | 860;5468;862;4780;196;6256                                           | RUNX2;PPARG;RUNX1T1;NFE2L2;AHR;RXRA                                                             | 0.003860263 | 0.034466637 | molecular_function |
| GO:0030374 | ligand-dependent nuclear receptor transcription coactivator activity | 2       | 30        | 40     | 12391    | 0.1       | 0.003   | 20.65166667      | 10499;5468                                                           | NCOA2;PPARG                                                                                     | 0.004174567 | 0.034788061 | molecular_function |
| GO:0071356 | cellular response to tumor necrosis factor                           | 2       | 30        | 53     | 13332    | 0.1       | 0.004   | 16.76981132      | 1432;4780                                                            | MAPK14;NFE2L2                                                                                   | 0.006281537 | 0.053821332 | biological_process |
| GO:0016301 | kinase activity                                                      | 2       | 30        | 50     | 12391    | 0.1       | 0.004   | 16.52133333      | 5294;1017                                                            | PIK3CG;CDK2                                                                                     | 0.006458635 | 0.050458086 | molecular_function |
| GO:0045893 | positive regulation of transcription, DNA-templated                  | 4       | 30        | 339    | 13332    | 0.1       | 0.025   | 5.243657817      | 860;1017;196;5468                                                    | RUNX2;CDK2;AHR;PPARG                                                                            | 0.006676561 | 0.053821332 | biological_process |
| GO:0007059 | chromosome segregation                                               | 2       | 30        | 55     | 13332    | 0.1       | 0.004   | 16.16            | 7153;332                                                             | TOP2A;BIRC5                                                                                     | 0.006750463 | 0.053821332 | biological_process |
| GO:0030168 | platelet activation                                                  | 2       | 30        | 56     | 13332    | 0.1       | 0.004   | 15.87142857      | 5578;5294                                                            | PRKCA;PIK3CG                                                                                    | 0.00699074  | 0.053821332 | biological_process |
| GO:0071456 | cellular response to hypoxia                                         | 2       | 30        | 56     | 13332    | 0.1       | 0.004   | 15.87142857      | 7422;4780                                                            | VEGFA;NFE2L2                                                                                    | 0.00699074  | 0.053821332 | biological_process |
| GO:0010628 | positive regulation of gene expression                               | 3       | 30        | 176    | 13332    | 0.1       | 0.013   | 7.575            | 860;2697;4780                                                        | RUNX2;GJA1;NFE2L2                                                                               | 0.007067176 | 0.053821332 | biological_process |
| GO:0010389 | regulation of G2/M transition of mitotic cell cycle                  | 2       | 30        | 58     | 13332    | 0.1       | 0.004   | 15.32413793      | 3320;1017                                                            | HSP90AA1;CDK2                                                                                   | 0.007482835 | 0.053821332 | biological_process |
| GO:0045892 | negative regulation of transcription, DNA-templated                  | 4       | 30        | 358    | 13332    | 0.1       | 0.027   | 4.965363128      | 860;196;332;862                                                      | RUNX2;AHR;BIRC5;RUNX1T1                                                                         | 0.008069546 | 0.053821332 | biological_process |
| GO:0001649 | osteoblast differentiation                                           | 2       | 30        | 67     | 13332    | 0.1       | 0.005   | 13.26567164      | 860;2697                                                             | RUNX2;GJA1                                                                                      | 0.009884274 | 0.053821332 | biological_process |
| GO:0010468 | regulation of gene expression                                        | 2       | 30        | 68     | 13332    | 0.1       | 0.005   | 13.07058824      | 196;1432                                                             | AHR;MAPK14                                                                                      | 0.01016965  | 0.053821332 | biological_process |
| GO:0007204 | positive regulation of cytosolic calcium ion concentration           | 2       | 30        | 68     | 13332    | 0.1       | 0.005   | 13.07058824      | 2697;5294                                                            | GJA1;PIK3CG                                                                                     | 0.01016965  | 0.053821332 | biological_process |
| GO:0030522 | intracellular receptor signaling pathway                             | 1       | 30        | 5      | 13332    | 0.0       | 0.000   | 88.88            | 10499                                                                | NCOA2                                                                                           | 0.011202277 | 0.053821332 | biological_process |
| GO:0071467 | cellular response to pH                                              | 1       | 30        | 5      | 13332    | 0.0       | 0.000   | 88.88            | 2697                                                                 | GJA1                                                                                            | 0.011202277 | 0.053821332 | biological_process |
| GO:0003158 | endothelium development                                              | 1       | 30        | 5      | 13332    | 0.0       | 0.000   | 88.88            | 2697                                                                 | GJA1                                                                                            | 0.011202277 | 0.053821332 | biological_process |
| GO:0045040 | protein import into mitochondrial outer membrane                     | 1       | 30        | 5      | 13332    | 0.0       | 0.000   | 88.88            | 3320                                                                 | HSP90AA1                                                                                        | 0.011202277 | 0.053821332 | biological_process |
| GO:0035148 | tube formation                                                       | 1       | 30        | 5      | 13332    | 0.0       | 0.000   | 88.88            | 7422                                                                 | VEGFA                                                                                           | 0.011202277 | 0.053821332 | biological_process |
| GO:0060754 | positive regulation of mast cell chemotaxis                          | 1       | 30        | 5      | 13332    | 0.0       | 0.000   | 88.88            | 7422                                                                 | VEGFA                                                                                           | 0.011202277 | 0.053821332 | biological_process |
| GO:1903169 | regulation of calcium ion transmembrane transport                    | 1       | 30        | 5      | 13332    | 0.0       | 0.000   | 88.88            | 5294                                                                 | PIK3CG                                                                                          | 0.011202277 | 0.053821332 | biological_process |
| GO:0086045 | membrane depolarization during AV node cell action potential         | 1       | 30        | 5      | 13332    | 0.0       | 0.000   | 88.88            | 6331                                                                 | SCN5A                                                                                           | 0.011202277 | 0.053821332 | biological_process |
| GO:0002070 | epithelial cell maturation                                           | 1       | 30        | 5      | 13332    | 0.0       | 0.000   | 88.88            | 2697                                                                 | GJA1                                                                                            | 0.011202277 | 0.053821332 | biological_process |
| GO:0010818 | T cell chemotaxis                                                    | 1       | 30        | 5      | 13332    | 0.0       | 0.000   | 88.88            | 5294                                                                 | PIK3CG                                                                                          | 0.011202277 | 0.053821332 | biological_process |
| GO:0003360 | brainstem development                                                | 1       | 30        | 5      | 13332    | 0.0       | 0.000   | 88.88            | 6331                                                                 | SCN5A                                                                                           | 0.011202277 | 0.053821332 | biological_process |
| GO:0045760 | positive regulation of action potential                              | 1       | 30        | 5      | 13332    | 0.0       | 0.000   | 88.88            | 6331                                                                 | SCN5A                                                                                           | 0.011202277 | 0.053821332 | biological_process |
| GO:0031666 | positive regulation of lipopolysaccharide-mediated signaling pathway | 1       | 30        | 5      | 13332    | 0.0       | 0.000   | 88.88            | 5578                                                                 | PRKCA                                                                                           | 0.011202277 | 0.053821332 | biological_process |
| GO:0007617 | mating behavior                                                      | 1       | 30        | 5      | 13332    | 0.0       | 0.000   | 88.88            | 351                                                                  | APP                                                                                             | 0.011202277 | 0.053821332 | biological_process |
| GO:0046903 | secretion                                                            | 1       | 30        | 5      | 13332    | 0.0       | 0.000   | 88.88            | 760                                                                  | CA2                                                                                             | 0.011202277 | 0.053821332 | biological_process |
| GO:0051146 | striated muscle cell differentiation                                 | 1       | 30        | 5      | 13332    | 0.0       | 0.000   | 88.88            | 1432                                                                 | MAPK14                                                                                          | 0.011202277 | 0.053821332 | biological_process |

| Term_ID    | Term_description                                                                                                        | ListHit | ListTotal | PopHit | PopTotal | GeneRatio | BgRatio | Enrichment_score | GeneIds        | GeneSymbols       | p-value     | FDR_bh      | Category           |
|------------|-------------------------------------------------------------------------------------------------------------------------|---------|-----------|--------|----------|-----------|---------|------------------|----------------|-------------------|-------------|-------------|--------------------|
| GO:0015867 | ATP transport                                                                                                           | 1       | 30        | 5      | 13332    | 0.0       | 0.000   | 88.88            | 2697           | GJA1              | 0.011202277 | 0.053821332 | biological_process |
| GO:1901522 | positive regulation of transcription from RNA polymerase II promoter involved in cellular response to chemical stimulus | 1       | 30        | 5      | 13332    | 0.0       | 0.000   | 88.88            | 860            | RUNX2             | 0.011202277 | 0.053821332 | biological_process |
| GO:0045667 | regulation of osteoblast differentiation                                                                                | 1       | 30        | 5      | 13332    | 0.0       | 0.000   | 88.88            | 860            | RUNX2             | 0.011202277 | 0.053821332 | biological_process |
| GO:0004032 | alditol:NADP+ 1-oxidoreductase activity                                                                                 | 1       | 30        | 5      | 12391    | 0.0       | 0.000   | 82.60666667      | 231            | AKR1B1            | 0.01204902  | 0.065739172 | molecular_function |
| GO:0086006 | voltage-gated sodium channel activity involved in cardiac muscle cell action potential                                  | 1       | 30        | 5      | 12391    | 0.0       | 0.000   | 82.60666667      | 6331           | SCN5A             | 0.01204902  | 0.065739172 | molecular_function |
| GO:0043184 | vascular endothelial growth factor receptor 2 binding                                                                   | 1       | 30        | 5      | 12391    | 0.0       | 0.000   | 82.60666667      | 7422           | VEGFA             | 0.01204902  | 0.065739172 | molecular_function |
| GO:0048273 | mitogen-activated protein kinase p38 binding                                                                            | 1       | 30        | 5      | 12391    | 0.0       | 0.000   | 82.60666667      | 1432           | MAPK14            | 0.01204902  | 0.065739172 | molecular_function |
| GO:0035005 | 1-phosphatidylinositol-4-phosphate 3-kinase activity                                                                    | 1       | 30        | 5      | 12391    | 0.0       | 0.000   | 82.60666667      | 5294           | PIK3CG            | 0.01204902  | 0.065739172 | molecular_function |
| GO:0071253 | connexin binding                                                                                                        | 1       | 30        | 5      | 12391    | 0.0       | 0.000   | 82.60666667      | 2697           | GJA1              | 0.01204902  | 0.065739172 | molecular_function |
| GO:0071682 | endocytic vesicle lumen                                                                                                 | 1       | 30        | 6      | 14857    | 0.0       | 0.000   | 82.53888889      | 3320           | HSP90AA1          | 0.012056524 | 0.089332063 | cellular_component |
| GO:0043220 | Schmidt-Lanterman incisure                                                                                              | 1       | 30        | 6      | 14857    | 0.0       | 0.000   | 82.53888889      | 231            | AKR1B1            | 0.012056524 | 0.089332063 | cellular_component |
| GO:0019899 | enzyme binding                                                                                                          | 3       | 30        | 203    | 12391    | 0.1       | 0.016   | 6.103940887      | 7153;6331;5578 | TOP2A;SCN5A;PRKCA | 0.012704289 | 0.065739172 | molecular_function |
| GO:0002076 | osteoblast development                                                                                                  | 1       | 30        | 6      | 13332    | 0.0       | 0.000   | 74.06666667      | 860            | RUNX2             | 0.013428129 | 0.053821332 | biological_process |
| GO:0071374 | cellular response to parathyroid hormone stimulus                                                                       | 1       | 30        | 6      | 13332    | 0.0       | 0.000   | 74.06666667      | 2697           | GJA1              | 0.013428129 | 0.053821332 | biological_process |
| GO:0008210 | estrogen metabolic process                                                                                              | 1       | 30        | 6      | 13332    | 0.0       | 0.000   | 74.06666667      | 6817           | SULT1A1           | 0.013428129 | 0.053821332 | biological_process |
| GO:1901653 | cellular response to peptide                                                                                            | 1       | 30        | 6      | 13332    | 0.0       | 0.000   | 74.06666667      | 231            | AKR1B1            | 0.013428129 | 0.053821332 | biological_process |
| GO:0060044 | negative regulation of cardiac muscle cell proliferation                                                                | 1       | 30        | 6      | 13332    | 0.0       | 0.000   | 74.06666667      | 2697           | GJA1              | 0.013428129 | 0.053821332 | biological_process |
| GO:0006265 | DNA topological change                                                                                                  | 1       | 30        | 6      | 13332    | 0.0       | 0.000   | 74.06666667      | 7153           | TOP2A             | 0.013428129 | 0.053821332 | biological_process |
| GO:1903206 | negative regulation of hydrogen peroxide-induced cell death                                                             | 1       | 30        | 6      | 13332    | 0.0       | 0.000   | 74.06666667      | 4780           | NFE2L2            | 0.013428129 | 0.053821332 | biological_process |
| GO:0032495 | response to muramyl dipeptide                                                                                           | 1       | 30        | 6      | 13332    | 0.0       | 0.000   | 74.06666667      | 1432           | MAPK14            | 0.013428129 | 0.053821332 | biological_process |
| GO:0003231 | cardiac ventricle development                                                                                           | 1       | 30        | 6      | 13332    | 0.0       | 0.000   | 74.06666667      | 6331           | SCN5A             | 0.013428129 | 0.053821332 | biological_process |
| GO:0009410 | response to xenobiotic stimulus                                                                                         | 1       | 30        | 6      | 13332    | 0.0       | 0.000   | 74.06666667      | 196            | AHR               | 0.013428129 | 0.053821332 | biological_process |
| GO:0055118 | negative regulation of cardiac muscle contraction                                                                       | 1       | 30        | 6      | 13332    | 0.0       | 0.000   | 74.06666667      | 5294           | PIK3CG            | 0.013428129 | 0.053821332 | biological_process |
| GO:0051186 | cofactor metabolic process                                                                                              | 1       | 30        | 6      | 13332    | 0.0       | 0.000   | 74.06666667      | 3320           | HSP90AA1          | 0.013428129 | 0.053821332 | biological_process |
| GO:0035235 | ionotropic glutamate receptor signaling pathway                                                                         | 1       | 30        | 6      | 13332    | 0.0       | 0.000   | 74.06666667      | 351            | APP               | 0.013428129 | 0.053821332 | biological_process |
| GO:0071223 | cellular response to lipoteichoic acid                                                                                  | 1       | 30        | 6      | 13332    | 0.0       | 0.000   | 74.06666667      | 1432           | MAPK14            | 0.013428129 | 0.053821332 | biological_process |
| GO:0042770 | signal transduction in response to DNA damage                                                                           | 1       | 30        | 6      | 13332    | 0.0       | 0.000   | 74.06666667      | 1432           | MAPK14            | 0.013428129 | 0.053821332 | biological_process |
| GO:0035994 | response to muscle stretch                                                                                              | 1       | 30        | 6      | 13332    | 0.0       | 0.000   | 74.06666667      | 1432           | MAPK14            | 0.013428129 | 0.053821332 | biological_process |
| GO:0010831 | positive regulation of myotube differentiation                                                                          | 1       | 30        | 6      | 13332    | 0.0       | 0.000   | 74.06666667      | 1432           | MAPK14            | 0.013428129 | 0.053821332 | biological_process |
| GO:0044070 | regulation of anion transport                                                                                           | 1       | 30        | 6      | 13332    | 0.0       | 0.000   | 74.06666667      | 760            | CA2               | 0.013428129 | 0.053821332 | biological_process |
| GO:0051272 | positive regulation of cellular component movement                                                                      | 1       | 30        | 6      | 13332    | 0.0       | 0.000   | 74.06666667      | 7422           | VEGFA             | 0.013428129 | 0.053821332 | biological_process |
| GO:0086015 | SA node cell action potential                                                                                           | 1       | 30        | 6      | 13332    | 0.0       | 0.000   | 74.06666667      | 6331           | SCN5A             | 0.013428129 | 0.053821332 | biological_process |
| GO:0033010 | paranodal junction                                                                                                      | 1       | 30        | 7      | 14857    | 0.0       | 0.000   | 70.74761905      | 231            | AKR1B1            | 0.014052235 | 0.089332063 | cellular_component |
| GO:0000307 | cyclin-dependent protein kinase holoenzyme complex                                                                      | 1       | 30        | 7      | 14857    | 0.0       | 0.000   | 70.74761905      | 1017           | CDK2              | 0.014052235 | 0.089332063 | cellular_component |
| GO:0005916 | fascia adherens                                                                                                         | 1       | 30        | 7      | 14857    | 0.0       | 0.000   | 70.74761905      | 2697           | GJA1              | 0.014052235 | 0.089332063 | cellular_component |
| GO:0001162 | RNA polymerase II intronic transcription regulatory region sequence-specific DNA binding                                | 1       | 30        | 6      | 12391    | 0.0       | 0.000   | 68.83888889      | 10499          | NCOA2             | 0.014441926 | 0.065739172 | molecular_function |
| GO:0019870 | potassium channel inhibitor activity                                                                                    | 1       | 30        | 6      | 12391    | 0.0       | 0.000   | 68.83888889      | 5921           | RASA1             | 0.014441926 | 0.065739172 | molecular_function |
| GO:0042826 | histone deacetylase binding                                                                                             | 2       | 30        | 77     | 12391    | 0.1       | 0.006   | 10.72813853      | 3320;7153      | HSP90AA1;TOP2A    | 0.014816299 | 0.065739172 | molecular_function |
| GO:0030165 | PDZ domain binding                                                                                                      | 2       | 30        | 77     | 12391    | 0.1       | 0.006   | 10.72813853      | 2697;5728      | GJA1;PTEN         | 0.014816299 | 0.065739172 | molecular_function |
| GO:0000086 | G2/M transition of mitotic cell cycle                                                                                   | 2       | 30        | 83     | 13332    | 0.1       | 0.006   | 10.70843373      | 3320;332       | HSP90AA1;BIRC5    | 0.014878767 | 0.053821332 | biological_process |
| GO:0005125 | cytokine activity                                                                                                       | 2       | 30        | 79     | 12391    | 0.1       | 0.006   | 10.45654008      | 3565;7422      | IL4;VEGFA         | 0.015554658 | 0.065739172 | molecular_function |
| GO:0016572 | histone phosphorylation                                                                                                 | 1       | 30        | 7      | 13332    | 0.0       | 0.001   | 63.48571429      | 1017           | CDK2              | 0.015649137 | 0.053821332 | biological_process |
| GO:0016264 | gap junction assembly                                                                                                   | 1       | 30        | 7      | 13332    | 0.0       | 0.001   | 63.48571429      | 2697           | GJA1              | 0.015649137 | 0.053821332 | biological_process |
| GO:0006700 | C21-steroid hormone biosynthetic process                                                                                | 1       | 30        | 7      | 13332    | 0.0       | 0.001   | 63.48571429      | 231            | AKR1B1            | 0.015649137 | 0.053821332 | biological_process |
| GO:1903351 | cellular response to dopamine                                                                                           | 1       | 30        | 7      | 13332    | 0.0       | 0.001   | 63.48571429      | 6818           | SULT1A3           | 0.015649137 | 0.053821332 | biological_process |
| GO:0019395 | fatty acid oxidation                                                                                                    | 1       | 30        | 7      | 13332    | 0.0       | 0.001   | 63.48571429      | 1432           | MAPK14            | 0.015649137 | 0.053821332 | biological_process |
| GO:0044597 | daunorubicin metabolic process                                                                                          | 1       | 30        | 7      | 13332    | 0.0       | 0.001   | 63.48571429      | 231            | AKR1B1            | 0.015649137 | 0.053821332 | biological_process |
| GO:0044598 | doxorubicin metabolic process                                                                                           | 1       | 30        | 7      | 13332    | 0.0       | 0.001   | 63.48571429      | 231            | AKR1B1            | 0.015649137 | 0.053821332 | biological_process |
| GO:0035767 | endothelial cell chemotaxis                                                                                             | 1       | 30        | 7      | 13332    | 0.0       | 0.001   | 63.48571429      | 7422           | VEGFA             | 0.015649137 | 0.053821332 | biological_process |
| GO:0090050 | positive regulation of cell migration involved in sprouting angiogenesis                                                | 1       | 30        | 7      | 13332    | 0.0       | 0.001   | 63.48571429      | 7422           | VEGFA             | 0.015649137 | 0.053821332 | biological_process |
| GO:1903071 | positive regulation of ER-associated ubiquitin-dependent protein catabolic process                                      | 1       | 30        | 7      | 13332    | 0.0       | 0.001   | 63.48571429      | 4780           | NFE2L2            | 0.015649137 | 0.053821332 | biological_process |
| GO:0030225 | macrophage differentiation                                                                                              | 1       | 30        | 7      | 13332    | 0.0       | 0.001   | 63.48571429      | 7422           | VEGFA             | 0.015649137 | 0.053821332 | biological_process |
| GO:1902305 | regulation of sodium ion transmembrane transport                                                                        | 1       | 30        | 7      | 13332    | 0.0       | 0.001   | 63.48571429      | 6331           | SCN5A             | 0.015649137 | 0.053821332 | biological_process |
| GO:0061045 | negative regulation of wound healing                                                                                    | 1       | 30        | 7      | 13332    | 0.0       | 0.001   | 63.48571429      | 2697           | GJA1              | 0.015649137 | 0.053821332 | biological_process |

| Term_ID    | Term_description                                                                     | ListHit | ListTotal | PopHit | PopTotal | GeneRatio | BgRatio | Enrichment_score | Genelds                           | GeneSymbols                                   | p-value     | FDR_bh      | Category           |
|------------|--------------------------------------------------------------------------------------|---------|-----------|--------|----------|-----------|---------|------------------|-----------------------------------|-----------------------------------------------|-------------|-------------|--------------------|
| GO:0014894 | response to denervation involved in regulation of muscle adaptation                  | 1       | 30        | 7      | 13332    | 0.0       | 0.001   | 63.48571429      | 6331                              | SCN5A                                         | 0.015649137 | 0.053821332 | biological_process |
| GO:0010759 | positive regulation of macrophage chemotaxis                                         | 1       | 30        | 7      | 13332    | 0.0       | 0.001   | 63.48571429      | 1432                              | MAPK14                                        | 0.015649137 | 0.053821332 | biological_process |
| GO:2000810 | regulation of bicellular tight junction assembly                                     | 1       | 30        | 7      | 13332    | 0.0       | 0.001   | 63.48571429      | 2697                              | GJA1                                          | 0.015649137 | 0.053821332 | biological_process |
| GO:0045651 | positive regulation of macrophage differentiation                                    | 1       | 30        | 7      | 13332    | 0.0       | 0.001   | 63.48571429      | 5578                              | PRKCA                                         | 0.015649137 | 0.053821332 | biological_process |
| GO:0002675 | positive regulation of acute inflammatory response                                   | 1       | 30        | 7      | 13332    | 0.0       | 0.001   | 63.48571429      | 5294                              | PIK3CG                                        | 0.015649137 | 0.053821332 | biological_process |
| GO:0046697 | decidualization                                                                      | 1       | 30        | 7      | 13332    | 0.0       | 0.001   | 63.48571429      | 2697                              | GJA1                                          | 0.015649137 | 0.053821332 | biological_process |
| GO:0008083 | growth factor activity                                                               | 2       | 30        | 82     | 12391    | 0.1       | 0.007   | 10.07398374      | 3565;7422                         | IL4;VEGFA                                     | 0.016691422 | 0.065739172 | molecular_function |
| GO:0008094 | DNA-dependent ATPase activity                                                        | 1       | 30        | 7      | 12391    | 0.0       | 0.001   | 59.0047619       | 7153                              | TOP2A                                         | 0.016829228 | 0.065739172 | molecular_function |
| GO:0030911 | TPR domain binding                                                                   | 1       | 30        | 7      | 12391    | 0.0       | 0.001   | 59.0047619       | 3320                              | HSP90AA1                                      | 0.016829228 | 0.065739172 | molecular_function |
| GO:0005243 | gap junction channel activity                                                        | 1       | 30        | 7      | 12391    | 0.0       | 0.001   | 59.0047619       | 2697                              | GJA1                                          | 0.016829228 | 0.065739172 | molecular_function |
| GO:0050872 | white fat cell differentiation                                                       | 1       | 30        | 8      | 13332    | 0.0       | 0.001   | 55.55            | 5468                              | PPARG                                         | 0.017865312 | 0.055247351 | biological_process |
| GO:0048545 | response to steroid hormone                                                          | 1       | 30        | 8      | 13332    | 0.0       | 0.001   | 55.55            | 760                               | CA2                                           | 0.017865312 | 0.055247351 | biological_process |
| GO:0046855 | inositol phosphate dephosphorylation                                                 | 1       | 30        | 8      | 13332    | 0.0       | 0.001   | 55.55            | 5728                              | PTEN                                          | 0.017865312 | 0.055247351 | biological_process |
| GO:0007178 | transmembrane receptor protein serine/threonine kinase signaling pathway             | 1       | 30        | 8      | 13332    | 0.0       | 0.001   | 55.55            | 1432                              | MAPK14                                        | 0.017865312 | 0.055247351 | biological_process |
| GO:0006878 | cellular copper ion homeostasis                                                      | 1       | 30        | 8      | 13332    | 0.0       | 0.001   | 55.55            | 351                               | APP                                           | 0.017865312 | 0.055247351 | biological_process |
| GO:0042026 | protein refolding                                                                    | 1       | 30        | 8      | 13332    | 0.0       | 0.001   | 55.55            | 3320                              | HSP90AA1                                      | 0.017865312 | 0.055247351 | biological_process |
| GO:0009268 | response to pH                                                                       | 1       | 30        | 8      | 13332    | 0.0       | 0.001   | 55.55            | 760                               | CA2                                           | 0.017865312 | 0.055247351 | biological_process |
| GO:0045475 | locomotor rhythm                                                                     | 1       | 30        | 8      | 13332    | 0.0       | 0.001   | 55.55            | 10499                             | NCOA2                                         | 0.017865312 | 0.055247351 | biological_process |
| GO:0030949 | positive regulation of vascular endothelial growth factor receptor signaling pathway | 1       | 30        | 8      | 13332    | 0.0       | 0.001   | 55.55            | 7422                              | VEGFA                                         | 0.017865312 | 0.055247351 | biological_process |
| GO:2000279 | negative regulation of DNA biosynthetic process                                      | 1       | 30        | 8      | 13332    | 0.0       | 0.001   | 55.55            | 2697                              | GJA1                                          | 0.017865312 | 0.055247351 | biological_process |
| GO:0033628 | regulation of cell adhesion mediated by integrin                                     | 1       | 30        | 8      | 13332    | 0.0       | 0.001   | 55.55            | 5294                              | PIK3CG                                        | 0.017865312 | 0.055247351 | biological_process |
| GO:0016322 | neuron remodeling                                                                    | 1       | 30        | 8      | 13332    | 0.0       | 0.001   | 55.55            | 351                               | APP                                           | 0.017865312 | 0.055247351 | biological_process |
| GO:0005524 | ATP binding                                                                          | 7       | 30        | 1153   | 12391    | 0.2       | 0.093   | 2.507574443      | 860;7153;5294;1432;3320;5578;1017 | RUNX2;TOP2A;PIK3CG;MAPK14;HSP90AA1;PRKCA;CDK2 | 0.017929715 | 0.067915586 | molecular_function |
| GO:0043209 | myelin sheath                                                                        | 2       | 30        | 104    | 14857    | 0.1       | 0.007   | 9.523717949      | 3320;760                          | HSP90AA1;CA2                                  | 0.018583807 | 0.110263919 | cellular_component |
| GO:0006357 | regulation of transcription from RNA polymerase II promoter                          | 3       | 30        | 254    | 13332    | 0.1       | 0.019   | 5.248818898      | 196;6648;1432                     | AHR;SOD2;MAPK14                               | 0.018989673 | 0.056398564 | biological_process |
| GO:0005161 | platelet-derived growth factor receptor binding                                      | 1       | 30        | 8      | 12391    | 0.0       | 0.001   | 51.62916667      | 7422                              | VEGFA                                         | 0.01921094  | 0.068610501 | molecular_function |
| GO:0001223 | transcription coactivator binding                                                    | 1       | 30        | 8      | 12391    | 0.0       | 0.001   | 51.62916667      | 196                               | AHR                                           | 0.01921094  | 0.068610501 | molecular_function |
| GO:0050930 | induction of positive chemotaxis                                                     | 1       | 30        | 9      | 13332    | 0.0       | 0.001   | 49.37777778      | 7422                              | VEGFA                                         | 0.020076663 | 0.056398564 | biological_process |
| GO:0045672 | positive regulation of osteoclast differentiation                                    | 1       | 30        | 9      | 13332    | 0.0       | 0.001   | 49.37777778      | 760                               | CA2                                           | 0.020076663 | 0.056398564 | biological_process |
| GO:0002009 | morphogenesis of an epithelium                                                       | 1       | 30        | 9      | 13332    | 0.0       | 0.001   | 49.37777778      | 760                               | CA2                                           | 0.020076663 | 0.056398564 | biological_process |
| GO:0001894 | tissue homeostasis                                                                   | 1       | 30        | 9      | 13332    | 0.0       | 0.001   | 49.37777778      | 231                               | AKR1B1                                        | 0.020076663 | 0.056398564 | biological_process |
| GO:0042098 | T cell proliferation                                                                 | 1       | 30        | 9      | 13332    | 0.0       | 0.001   | 49.37777778      | 5294                              | PIK3CG                                        | 0.020076663 | 0.056398564 | biological_process |
| GO:0097755 | positive regulation of blood vessel diameter                                         | 1       | 30        | 9      | 13332    | 0.0       | 0.001   | 49.37777778      | 2697                              | GJA1                                          | 0.020076663 | 0.056398564 | biological_process |
| GO:0030224 | monocyte differentiation                                                             | 1       | 30        | 9      | 13332    | 0.0       | 0.001   | 49.37777778      | 7422                              | VEGFA                                         | 0.020076663 | 0.056398564 | biological_process |
| GO:0007512 | adult heart development                                                              | 1       | 30        | 9      | 13332    | 0.0       | 0.001   | 49.37777778      | 2697                              | GJA1                                          | 0.020076663 | 0.056398564 | biological_process |
| GO:0050918 | positive chemotaxis                                                                  | 1       | 30        | 9      | 13332    | 0.0       | 0.001   | 49.37777778      | 7422                              | VEGFA                                         | 0.020076663 | 0.056398564 | biological_process |
| GO:0086005 | ventricular cardiac muscle cell action potential                                     | 1       | 30        | 9      | 13332    | 0.0       | 0.001   | 49.37777778      | 6331                              | SCN5A                                         | 0.020076663 | 0.056398564 | biological_process |
| GO:0043303 | mast cell degranulation                                                              | 1       | 30        | 9      | 13332    | 0.0       | 0.001   | 49.37777778      | 5294                              | PIK3CG                                        | 0.020076663 | 0.056398564 | biological_process |
| GO:0008360 | regulation of cell shape                                                             | 2       | 30        | 100    | 13332    | 0.1       | 0.008   | 8.888            | 7422;5921                         | VEGFA;RASA1                                   | 0.021138662 | 0.057391439 | biological_process |
| GO:0015075 | ion transmembrane transporter activity                                               | 1       | 30        | 9      | 12391    | 0.0       | 0.001   | 45.89259259      | 2697                              | GJA1                                          | 0.021587075 | 0.072402975 | molecular_function |
| GO:0050998 | nitric-oxide synthase binding                                                        | 1       | 30        | 9      | 12391    | 0.0       | 0.001   | 45.89259259      | 6331                              | SCN5A                                         | 0.021587075 | 0.072402975 | molecular_function |
| GO:0031235 | intrinsic component of the cytoplasmic side of the plasma membrane                   | 1       | 30        | 11     | 14857    | 0.0       | 0.001   | 45.02121212      | 5921                              | RASA1                                         | 0.021996179 | 0.118530577 | cellular_component |
| GO:0008201 | heparin binding                                                                      | 2       | 30        | 95     | 12391    | 0.1       | 0.008   | 8.695438596      | 351;7422                          | APP;VEGFA                                     | 0.022010504 | 0.072402975 | molecular_function |
| GO:0086064 | cell communication by electrical coupling involved in cardiac conduction             | 1       | 30        | 10     | 13332    | 0.0       | 0.001   | 44.44            | 2697                              | GJA1                                          | 0.0222832   | 0.057391439 | biological_process |
| GO:0002042 | cell migration involved in sprouting angiogenesis                                    | 1       | 30        | 10     | 13332    | 0.0       | 0.001   | 44.44            | 7422                              | VEGFA                                         | 0.0222832   | 0.057391439 | biological_process |
| GO:0000712 | resolution of meiotic recombination intermediates                                    | 1       | 30        | 10     | 13332    | 0.0       | 0.001   | 44.44            | 7153                              | TOP2A                                         | 0.0222832   | 0.057391439 | biological_process |
| GO:0032793 | positive regulation of CREB transcription factor activity                            | 1       | 30        | 10     | 13332    | 0.0       | 0.001   | 44.44            | 7422                              | VEGFA                                         | 0.0222832   | 0.057391439 | biological_process |
| GO:0031396 | regulation of protein ubiquitination                                                 | 1       | 30        | 10     | 13332    | 0.0       | 0.001   | 44.44            | 3320                              | HSP90AA1                                      | 0.0222832   | 0.057391439 | biological_process |
| GO:0032332 | positive regulation of chondrocyte differentiation                                   | 1       | 30        | 10     | 13332    | 0.0       | 0.001   | 44.44            | 860                               | RUNX2                                         | 0.0222832   | 0.057391439 | biological_process |
| GO:0030833 | regulation of actin filament polymerization                                          | 1       | 30        | 10     | 13332    | 0.0       | 0.001   | 44.44            | 5921                              | RASA1                                         | 0.0222832   | 0.057391439 | biological_process |
| GO:0032230 | positive regulation of synaptic transmission, GABAergic                              | 1       | 30        | 10     | 13332    | 0.0       | 0.001   | 44.44            | 760                               | CA2                                           | 0.0222832   | 0.057391439 | biological_process |
| GO:0051895 | negative regulation of focal adhesion assembly                                       | 1       | 30        | 10     | 13332    | 0.0       | 0.001   | 44.44            | 5728                              | PTEN                                          | 0.0222832   | 0.057391439 | biological_process |

| Term_ID    | Term_description                                                     | ListHit | ListTotal | PopHit | PopTotal | GeneRatio | BgRatio | Enrichment_score | GeneIds                                                                                              | GeneSymbols      | p-value     | FDR_bh      | Category           |
|------------|----------------------------------------------------------------------|---------|-----------|--------|----------|-----------|---------|------------------|------------------------------------------------------------------------------------------------------|------------------|-------------|-------------|--------------------|
| GO:0046677 | response to antibiotic                                               | 1       | 30        | 10     | 13332    | 0.0       | 0.001   | 44.44            | 3320                                                                                                 | HSP90AA1         | 0.0222832   | 0.057391439 | biological_process |
| GO:0007507 | heart development                                                    | 2       | 30        | 104    | 13332    | 0.1       | 0.008   | 8.546153846      | 2697;5728                                                                                            | GJA1;PTEN        | 0.022746178 | 0.057391439 | biological_process |
| GO:0004697 | protein kinase C activity                                            | 1       | 30        | 10     | 12391    | 0.0       | 0.001   | 41.30333333      | 5578                                                                                                 | PRKCA            | 0.023957644 | 0.073041597 | molecular_function |
| GO:0017134 | fibroblast growth factor binding                                     | 1       | 30        | 10     | 12391    | 0.0       | 0.001   | 41.30333333      | 6331                                                                                                 | SCN5A            | 0.023957644 | 0.073041597 | molecular_function |
| GO:0035257 | nuclear hormone receptor binding                                     | 1       | 30        | 10     | 12391    | 0.0       | 0.001   | 41.30333333      | 10499                                                                                                | NCOA2            | 0.023957644 | 0.073041597 | molecular_function |
| GO:0001518 | voltage-gated sodium channel complex                                 | 1       | 30        | 12     | 14857    | 0.0       | 0.001   | 41.26944444      | 6331                                                                                                 | SCN5A            | 0.023972476 | 0.118530577 | cellular_component |
| GO:0005921 | gap junction                                                         | 1       | 30        | 12     | 14857    | 0.0       | 0.001   | 41.26944444      | 2697                                                                                                 | GJA1             | 0.023972476 | 0.118530577 | cellular_component |
| GO:0008284 | positive regulation of cell proliferation                            | 3       | 30        | 279    | 13332    | 0.1       | 0.021   | 4.778494624      | 860;1017;7422                                                                                        | RUNX2;CDK2;VEGFA | 0.024265981 | 0.057391439 | biological_process |
| GO:0042307 | positive regulation of protein import into nucleus                   | 1       | 30        | 11     | 13332    | 0.0       | 0.001   | 40.4             | 1432                                                                                                 | MAPK14           | 0.024484935 | 0.057391439 | biological_process |
| GO:0002063 | chondrocyte development                                              | 1       | 30        | 11     | 13332    | 0.0       | 0.001   | 40.4             | 860                                                                                                  | RUNX2            | 0.024484935 | 0.057391439 | biological_process |
| GO:0001958 | endochondral ossification                                            | 1       | 30        | 11     | 13332    | 0.0       | 0.001   | 40.4             | 860                                                                                                  | RUNX2            | 0.024484935 | 0.057391439 | biological_process |
| GO:0007004 | telomere maintenance via telomerase                                  | 1       | 30        | 11     | 13332    | 0.0       | 0.001   | 40.4             | 3320                                                                                                 | HSP90AA1         | 0.024484935 | 0.057391439 | biological_process |
| GO:0060968 | regulation of gene silencing                                         | 1       | 30        | 11     | 13332    | 0.0       | 0.001   | 40.4             | 1017                                                                                                 | CDK2             | 0.024484935 | 0.057391439 | biological_process |
| GO:0006801 | superoxide metabolic process                                         | 1       | 30        | 11     | 13332    | 0.0       | 0.001   | 40.4             | 6648                                                                                                 | SOD2             | 0.024484935 | 0.057391439 | biological_process |
| GO:0001953 | negative regulation of cell-matrix adhesion                          | 1       | 30        | 11     | 13332    | 0.0       | 0.001   | 40.4             | 5921                                                                                                 | RASA1            | 0.024484935 | 0.057391439 | biological_process |
| GO:0086004 | regulation of cardiac muscle cell contraction                        | 1       | 30        | 11     | 13332    | 0.0       | 0.001   | 40.4             | 6331                                                                                                 | SCN5A            | 0.024484935 | 0.057391439 | biological_process |
| GO:0051131 | chaperone-mediated protein complex assembly                          | 1       | 30        | 11     | 13332    | 0.0       | 0.001   | 40.4             | 3320                                                                                                 | HSP90AA1         | 0.024484935 | 0.057391439 | biological_process |
| GO:0050999 | regulation of nitric-oxide synthase activity                         | 1       | 30        | 11     | 13332    | 0.0       | 0.001   | 40.4             | 3320                                                                                                 | HSP90AA1         | 0.024484935 | 0.057391439 | biological_process |
| GO:2000352 | negative regulation of endothelial cell apoptotic process            | 1       | 30        | 11     | 13332    | 0.0       | 0.001   | 40.4             | 4780                                                                                                 | NFE2L2           | 0.024484935 | 0.057391439 | biological_process |
| GO:0001816 | cytokine production                                                  | 1       | 30        | 11     | 13332    | 0.0       | 0.001   | 40.4             | 5294                                                                                                 | PIK3CG           | 0.024484935 | 0.057391439 | biological_process |
| GO:0043254 | regulation of protein complex assembly                               | 1       | 30        | 11     | 13332    | 0.0       | 0.001   | 40.4             | 3320                                                                                                 | HSP90AA1         | 0.024484935 | 0.057391439 | biological_process |
| GO:0006897 | endocytosis                                                          | 2       | 30        | 111    | 13332    | 0.1       | 0.008   | 8.007207207      | 351;5294                                                                                             | APP;PIK3CG       | 0.025677266 | 0.059508668 | biological_process |
| GO:0035326 | enhancer binding                                                     | 1       | 30        | 11     | 12391    | 0.0       | 0.001   | 37.54848485      | 196                                                                                                  | AHR              | 0.02632266  | 0.076282279 | molecular_function |
| GO:0070182 | DNA polymerase binding                                               | 1       | 30        | 11     | 12391    | 0.0       | 0.001   | 37.54848485      | 3320                                                                                                 | HSP90AA1         | 0.02632266  | 0.076282279 | molecular_function |
| GO:0010906 | regulation of glucose metabolic process                              | 1       | 30        | 12     | 13332    | 0.0       | 0.001   | 37.03333333      | 10499                                                                                                | NCOA2            | 0.026681876 | 0.059508668 | biological_process |
| GO:0009235 | cobalamin metabolic process                                          | 1       | 30        | 12     | 13332    | 0.0       | 0.001   | 37.03333333      | 5644                                                                                                 | PRSS1            | 0.026681876 | 0.059508668 | biological_process |
| GO:0086012 | membrane depolarization during cardiac muscle cell action potential  | 1       | 30        | 12     | 13332    | 0.0       | 0.001   | 37.03333333      | 6331                                                                                                 | SCN5A            | 0.026681876 | 0.059508668 | biological_process |
| GO:0043403 | skeletal muscle tissue regeneration                                  | 1       | 30        | 12     | 13332    | 0.0       | 0.001   | 37.03333333      | 2697                                                                                                 | GJA1             | 0.026681876 | 0.059508668 | biological_process |
| GO:1901741 | positive regulation of myoblast fusion                               | 1       | 30        | 12     | 13332    | 0.0       | 0.001   | 37.03333333      | 1432                                                                                                 | MAPK14           | 0.026681876 | 0.059508668 | biological_process |
| GO:0060045 | positive regulation of cardiac muscle cell proliferation             | 1       | 30        | 12     | 13332    | 0.0       | 0.001   | 37.03333333      | 1432                                                                                                 | MAPK14           | 0.026681876 | 0.059508668 | biological_process |
| GO:0043434 | response to peptide hormone                                          | 1       | 30        | 12     | 13332    | 0.0       | 0.001   | 37.03333333      | 2697                                                                                                 | GJA1             | 0.026681876 | 0.059508668 | biological_process |
| GO:0005634 | nucleus                                                              | 14      | 30        | 4252   | 14857    | 0.5       | 0.286   | 1.630589526      | 860;7153;5468;332;1432;3320;4780;8625;MAPK14;HSP90AA1;NFE2L2;RUNX1T1;AHR;CASP7;NCOA2;CDK2;NR1I3;RXRA |                  | 0.027022966 | 0.126581261 | cellular_component |
| GO:0008301 | DNA binding, bending                                                 | 1       | 30        | 12     | 12391    | 0.0       | 0.001   | 34.41944444      | 7153                                                                                                 | TOP2A            | 0.028682137 | 0.076282279 | molecular_function |
| GO:0043027 | cysteine-type endopeptidase inhibitor activity involved in apoptotic | 1       | 30        | 12     | 12391    | 0.0       | 0.001   | 34.41944444      | 332                                                                                                  | BIRC5            | 0.028682137 | 0.076282279 | molecular_function |
| GO:0042056 | chemoattractant activity                                             | 1       | 30        | 12     | 12391    | 0.0       | 0.001   | 34.41944444      | 7422                                                                                                 | VEGFA            | 0.028682137 | 0.076282279 | molecular_function |
| GO:0048037 | cofactor binding                                                     | 1       | 30        | 12     | 12391    | 0.0       | 0.001   | 34.41944444      | 332                                                                                                  | BIRC5            | 0.028682137 | 0.076282279 | molecular_function |
| GO:0010613 | positive regulation of cardiac muscle hypertrophy                    | 1       | 30        | 13     | 13332    | 0.0       | 0.001   | 34.18461538      | 5578                                                                                                 | PRKCA            | 0.028874034 | 0.060031889 | biological_process |
| GO:0009408 | response to heat                                                     | 1       | 30        | 13     | 13332    | 0.0       | 0.001   | 34.18461538      | 3320                                                                                                 | HSP90AA1         | 0.028874034 | 0.060031889 | biological_process |
| GO:0031954 | positive regulation of protein autophosphorylation                   | 1       | 30        | 13     | 13332    | 0.0       | 0.001   | 34.18461538      | 7422                                                                                                 | VEGFA            | 0.028874034 | 0.060031889 | biological_process |
| GO:0045995 | regulation of embryonic development                                  | 1       | 30        | 13     | 13332    | 0.0       | 0.001   | 34.18461538      | 4780                                                                                                 | NFE2L2           | 0.028874034 | 0.060031889 | biological_process |
| GO:0070371 | ERK1 and ERK2 cascade                                                | 1       | 30        | 13     | 13332    | 0.0       | 0.001   | 34.18461538      | 6818                                                                                                 | SULT1A3          | 0.028874034 | 0.060031889 | biological_process |
| GO:0007212 | dopamine receptor signaling pathway                                  | 1       | 30        | 13     | 13332    | 0.0       | 0.001   | 34.18461538      | 6818                                                                                                 | SULT1A3          | 0.028874034 | 0.060031889 | biological_process |
| GO:0031663 | lipopolysaccharide-mediated signaling pathway                        | 1       | 30        | 13     | 13332    | 0.0       | 0.001   | 34.18461538      | 1432                                                                                                 | MAPK14           | 0.028874034 | 0.060031889 | biological_process |
| GO:0040014 | regulation of multicellular organism growth                          | 1       | 30        | 13     | 13332    | 0.0       | 0.001   | 34.18461538      | 351                                                                                                  | APP              | 0.028874034 | 0.060031889 | biological_process |
| GO:0001502 | cartilage condensation                                               | 1       | 30        | 13     | 13332    | 0.0       | 0.001   | 34.18461538      | 1432                                                                                                 | MAPK14           | 0.028874034 | 0.060031889 | biological_process |
| GO:0000077 | DNA damage checkpoint                                                | 1       | 30        | 13     | 13332    | 0.0       | 0.001   | 34.18461538      | 1432                                                                                                 | MAPK14           | 0.028874034 | 0.060031889 | biological_process |
| GO:0010765 | positive regulation of sodium ion transport                          | 1       | 30        | 13     | 13332    | 0.0       | 0.001   | 34.18461538      | 6331                                                                                                 | SCN5A            | 0.028874034 | 0.060031889 | biological_process |
| GO:0045648 | positive regulation of erythrocyte differentiation                   | 1       | 30        | 13     | 13332    | 0.0       | 0.001   | 34.18461538      | 1432                                                                                                 | MAPK14           | 0.028874034 | 0.060031889 | biological_process |
| GO:0030660 | Golgi-associated vesicle membrane                                    | 1       | 30        | 15     | 14857    | 0.0       | 0.001   | 33.01555556      | 2697                                                                                                 | GJA1             | 0.029878234 | 0.132958141 | cellular_component |
| GO:0004089 | carbonate dehydratase activity                                       | 1       | 30        | 13     | 12391    | 0.0       | 0.001   | 31.77179487      | 760                                                                                                  | CA2              | 0.031036086 | 0.079173689 | molecular_function |
| GO:0004438 | phosphatidylinositol-3-phosphatase activity                          | 1       | 30        | 13     | 12391    | 0.0       | 0.001   | 31.77179487      | 5728                                                                                                 | PTEN             | 0.031036086 | 0.079173689 | molecular_function |
| GO:0030316 | osteoclast differentiation                                           | 1       | 30        | 14     | 13332    | 0.0       | 0.001   | 31.74285714      | 1432                                                                                                 | MAPK14           | 0.031061419 | 0.060161063 | biological_process |
| GO:0045907 | positive regulation of vasoconstriction                              | 1       | 30        | 14     | 13332    | 0.0       | 0.001   | 31.74285714      | 2697                                                                                                 | GJA1             | 0.031061419 | 0.060161063 | biological_process |
| GO:0016310 | phosphorylation                                                      | 1       | 30        | 14     | 13332    | 0.0       | 0.001   | 31.74285714      | 5294                                                                                                 | PIK3CG           | 0.031061419 | 0.060161063 | biological_process |

| Term_ID    | Term_description                                             | ListHit | ListTotal | PopHit | PopTotal | GeneRatio | BgRatio | Enrichment_score | GeneIds           | GeneSymbols                      | p-value     | FDR_bh      | Category           |
|------------|--------------------------------------------------------------|---------|-----------|--------|----------|-----------|---------|------------------|-------------------|----------------------------------|-------------|-------------|--------------------|
| GO:0051924 | regulation of calcium ion transport                          | 1       | 30        | 14     | 13332    | 0.0       | 0.001   | 31.74285714      | 2697              | GJA1                             | 0.031061419 | 0.060161063 | biological_process |
| GO:0010667 | negative regulation of cardiac muscle cell apoptotic process | 1       | 30        | 14     | 13332    | 0.0       | 0.001   | 31.74285714      | 4780              | NFE2L2                           | 0.031061419 | 0.060161063 | biological_process |
| GO:0030500 | regulation of bone mineralization                            | 1       | 30        | 14     | 13332    | 0.0       | 0.001   | 31.74285714      | 2697              | GJA1                             | 0.031061419 | 0.060161063 | biological_process |
| GO:0007099 | centriole replication                                        | 1       | 30        | 14     | 13332    | 0.0       | 0.001   | 31.74285714      | 1017              | CDK2                             | 0.031061419 | 0.060161063 | biological_process |
| GO:0098586 | cellular response to virus                                   | 1       | 30        | 14     | 13332    | 0.0       | 0.001   | 31.74285714      | 1432              | MAPK14                           | 0.031061419 | 0.060161063 | biological_process |
| GO:0010975 | regulation of neuron projection development                  | 1       | 30        | 14     | 13332    | 0.0       | 0.001   | 31.74285714      | 5728              | PTEN                             | 0.031061419 | 0.060161063 | biological_process |
| GO:0030217 | T cell differentiation                                       | 1       | 30        | 14     | 13332    | 0.0       | 0.001   | 31.74285714      | 860               | RUNX2                            | 0.031061419 | 0.060161063 | biological_process |
| GO:0070555 | response to interleukin-1                                    | 1       | 30        | 14     | 13332    | 0.0       | 0.001   | 31.74285714      | 5578              | PRKCA                            | 0.031061419 | 0.060161063 | biological_process |
| GO:0051899 | membrane depolarization                                      | 1       | 30        | 14     | 13332    | 0.0       | 0.001   | 31.74285714      | 6331              | SCN5A                            | 0.031061419 | 0.060161063 | biological_process |
| GO:0086002 | cardiac muscle cell action potential involved in contraction | 1       | 30        | 14     | 13332    | 0.0       | 0.001   | 31.74285714      | 6331              | SCN5A                            | 0.031061419 | 0.060161063 | biological_process |
| GO:0035556 | intracellular signal transduction                            | 3       | 30        | 308    | 13332    | 0.1       | 0.023   | 4.328571429      | 5578;5921;1432    | PRKCA;RASA1;MAPK14               | 0.031290254 | 0.060286982 | biological_process |
| GO:0001937 | negative regulation of endothelial cell proliferation        | 1       | 30        | 15     | 13332    | 0.0       | 0.001   | 29.62666667      | 2697              | GJA1                             | 0.03324404  | 0.062100542 | biological_process |
| GO:0002092 | positive regulation of receptor internalization              | 1       | 30        | 15     | 13332    | 0.0       | 0.001   | 29.62666667      | 7422              | VEGFA                            | 0.03324404  | 0.062100542 | biological_process |
| GO:0031334 | positive regulation of protein complex assembly              | 1       | 30        | 15     | 13332    | 0.0       | 0.001   | 29.62666667      | 7422              | VEGFA                            | 0.03324404  | 0.062100542 | biological_process |
| GO:0015721 | bile acid and bile salt transport                            | 1       | 30        | 15     | 13332    | 0.0       | 0.001   | 29.62666667      | 10499             | NCOA2                            | 0.03324404  | 0.062100542 | biological_process |
| GO:0060135 | maternal process involved in female pregnancy                | 1       | 30        | 15     | 13332    | 0.0       | 0.001   | 29.62666667      | 231               | AKR1B1                           | 0.03324404  | 0.062100542 | biological_process |
| GO:0010033 | response to organic substance                                | 1       | 30        | 15     | 13332    | 0.0       | 0.001   | 29.62666667      | 1017              | CDK2                             | 0.03324404  | 0.062100542 | biological_process |
| GO:0023026 | MHC class II protein complex binding                         | 1       | 30        | 14     | 12391    | 0.0       | 0.001   | 29.50238095      | 3320              | HSP90AA1                         | 0.03338452  | 0.081198754 | molecular_function |
| GO:0004033 | aldo-keto reductase (NADP) activity                          | 1       | 30        | 14     | 12391    | 0.0       | 0.001   | 29.50238095      | 231               | AKR1B1                           | 0.03338452  | 0.081198754 | molecular_function |
| GO:0005771 | multivesicular body                                          | 1       | 30        | 17     | 14857    | 0.0       | 0.001   | 29.13137255      | 2697              | GJA1                             | 0.033796199 | 0.136720986 | cellular_component |
| GO:0005922 | connexin complex                                             | 1       | 30        | 17     | 14857    | 0.0       | 0.001   | 29.13137255      | 2697              | GJA1                             | 0.033796199 | 0.136720986 | cellular_component |
| GO:0045663 | positive regulation of myoblast differentiation              | 1       | 30        | 16     | 13332    | 0.0       | 0.001   | 27.775           | 1432              | MAPK14                           | 0.035421909 | 0.063898346 | biological_process |
| GO:0016358 | dendrite development                                         | 1       | 30        | 16     | 13332    | 0.0       | 0.001   | 27.775           | 351               | APP                              | 0.035421909 | 0.063898346 | biological_process |
| GO:0021537 | telencephalon development                                    | 1       | 30        | 16     | 13332    | 0.0       | 0.001   | 27.775           | 6331              | SCN5A                            | 0.035421909 | 0.063898346 | biological_process |
| GO:0008202 | steroid metabolic process                                    | 1       | 30        | 16     | 13332    | 0.0       | 0.001   | 27.775           | 6818              | SULT1A3                          | 0.035421909 | 0.063898346 | biological_process |
| GO:0043491 | protein kinase B signaling                                   | 1       | 30        | 16     | 13332    | 0.0       | 0.001   | 27.775           | 5728              | PTEN                             | 0.035421909 | 0.063898346 | biological_process |
| GO:0014065 | phosphatidylinositol 3-kinase signaling                      | 1       | 30        | 16     | 13332    | 0.0       | 0.001   | 27.775           | 5294              | PIK3CG                           | 0.035421909 | 0.063898346 | biological_process |
| GO:0045429 | positive regulation of nitric oxide biosynthetic process     | 1       | 30        | 16     | 13332    | 0.0       | 0.001   | 27.775           | 3320              | HSP90AA1                         | 0.035421909 | 0.063898346 | biological_process |
| GO:0046983 | protein dimerization activity                                | 2       | 30        | 123    | 12391    | 0.1       | 0.010   | 6.71598916       | 10499;196         | NCOA2;AHR                        | 0.035478792 | 0.081198754 | molecular_function |
| GO:0001968 | fibronectin binding                                          | 1       | 30        | 15     | 12391    | 0.0       | 0.001   | 27.53555556      | 7422              | VEGFA                            | 0.035727452 | 0.081198754 | molecular_function |
| GO:0004693 | cyclin-dependent protein serine/threonine kinase activity    | 1       | 30        | 15     | 12391    | 0.0       | 0.001   | 27.53555556      | 1017              | CDK2                             | 0.035727452 | 0.081198754 | molecular_function |
| GO:0016922 | ligand-dependent nuclear receptor binding                    | 1       | 30        | 15     | 12391    | 0.0       | 0.001   | 27.53555556      | 10499             | NCOA2                            | 0.035727452 | 0.081198754 | molecular_function |
| GO:0042113 | B cell activation                                            | 1       | 30        | 17     | 13332    | 0.0       | 0.001   | 26.14117647      | 3565              | IL4                              | 0.037595035 | 0.066835618 | biological_process |
| GO:0045879 | negative regulation of smoothened signaling pathway          | 1       | 30        | 17     | 13332    | 0.0       | 0.001   | 26.14117647      | 860               | RUNX2                            | 0.037595035 | 0.066835618 | biological_process |
| GO:0097194 | execution phase of apoptosis                                 | 1       | 30        | 17     | 13332    | 0.0       | 0.001   | 26.14117647      | 840               | CASP7                            | 0.037595035 | 0.066835618 | biological_process |
| GO:0046914 | transition metal ion binding                                 | 1       | 30        | 16     | 12391    | 0.0       | 0.001   | 25.81458333      | 351               | APP                              | 0.038064893 | 0.08496628  | molecular_function |
| GO:0005876 | spindle microtubule                                          | 1       | 30        | 20     | 14857    | 0.0       | 0.001   | 24.76166667      | 332               | BIRC5                            | 0.039644481 | 0.153406904 | cellular_component |
| GO:0048863 | stem cell differentiation                                    | 1       | 30        | 18     | 13332    | 0.0       | 0.001   | 24.68888889      | 860               | RUNX2                            | 0.039763428 | 0.069350433 | biological_process |
| GO:0030593 | neutrophil chemotaxis                                        | 1       | 30        | 18     | 13332    | 0.0       | 0.001   | 24.68888889      | 5294              | PIK3CG                           | 0.039763428 | 0.069350433 | biological_process |
| GO:0046856 | phosphatidylinositol dephosphorylation                       | 1       | 30        | 18     | 13332    | 0.0       | 0.001   | 24.68888889      | 5728              | PTEN                             | 0.039763428 | 0.069350433 | biological_process |
| GO:0051894 | positive regulation of focal adhesion assembly               | 1       | 30        | 18     | 13332    | 0.0       | 0.001   | 24.68888889      | 7422              | VEGFA                            | 0.039763428 | 0.069350433 | biological_process |
| GO:0030506 | ankyrin binding                                              | 1       | 30        | 17     | 12391    | 0.0       | 0.001   | 24.29607843      | 6331              | SCN5A                            | 0.040396857 | 0.088589599 | molecular_function |
| GO:0045070 | positive regulation of viral genome replication              | 1       | 30        | 19     | 13332    | 0.0       | 0.001   | 23.38947368      | 7153              | TOP2A                            | 0.041927097 | 0.07176359  | biological_process |
| GO:0010043 | response to zinc ion                                         | 1       | 30        | 19     | 13332    | 0.0       | 0.001   | 23.38947368      | 760               | CA2                              | 0.041927097 | 0.07176359  | biological_process |
| GO:0046580 | negative regulation of Ras protein signal transduction       | 1       | 30        | 19     | 13332    | 0.0       | 0.001   | 23.38947368      | 5921              | RASA1                            | 0.041927097 | 0.07176359  | biological_process |
| GO:0051898 | negative regulation of protein kinase B signaling            | 1       | 30        | 19     | 13332    | 0.0       | 0.001   | 23.38947368      | 5728              | PTEN                             | 0.041927097 | 0.07176359  | biological_process |
| GO:0043425 | bHLH transcription factor binding                            | 1       | 30        | 18     | 12391    | 0.0       | 0.001   | 22.9462963       | 860               | RUNX2                            | 0.042723356 | 0.090515585 | molecular_function |
| GO:0048018 | receptor ligand activity                                     | 1       | 30        | 18     | 12391    | 0.0       | 0.001   | 22.9462963       | 7422              | VEGFA                            | 0.042723356 | 0.090515585 | molecular_function |
| GO:0048661 | positive regulation of smooth muscle cell proliferation      | 1       | 30        | 20     | 13332    | 0.0       | 0.002   | 22.22            | 231               | AKR1B1                           | 0.044086054 | 0.074080675 | biological_process |
| GO:0035115 | embryonic forelimb morphogenesis                             | 1       | 30        | 20     | 13332    | 0.0       | 0.002   | 22.22            | 860               | RUNX2                            | 0.044086054 | 0.074080675 | biological_process |
| GO:0003091 | renal water homeostasis                                      | 1       | 30        | 20     | 13332    | 0.0       | 0.002   | 22.22            | 231               | AKR1B1                           | 0.044086054 | 0.074080675 | biological_process |
| GO:0001890 | placenta development                                         | 1       | 30        | 20     | 13332    | 0.0       | 0.002   | 22.22            | 1432              | MAPK14                           | 0.044086054 | 0.074080675 | biological_process |
| GO:0042803 | protein homodimerization activity                            | 4       | 30        | 559    | 12391    | 0.1       | 0.045   | 2.955515802      | 3320;7153;332;862 | HSP90AA1;TOP2A;BIRC5;R<br>UNX1T1 | 0.04433445  | 0.091305485 | molecular_function |
| GO:0005248 | voltage-gated sodium channel activity                        | 1       | 30        | 19     | 12391    | 0.0       | 0.002   | 21.73859649      | 6331              | SCN5A                            | 0.045044402 | 0.091305485 | molecular_function |
| GO:0071479 | cellular response to ionizing radiation                      | 1       | 30        | 21     | 13332    | 0.0       | 0.002   | 21.16190476      | 1432              | MAPK14                           | 0.046240307 | 0.075628591 | biological_process |
| GO:0071773 | cellular response to BMP stimulus                            | 1       | 30        | 21     | 13332    | 0.0       | 0.002   | 21.16190476      | 860               | RUNX2                            | 0.046240307 | 0.075628591 | biological_process |

| Term_ID    | Term_description                                                                                       | ListHit | ListTotal | PopHit | PopTotal | GeneRatio | BgRatio | Enrichment_score | GeneIds | GeneSymbols | p-value     | FDR_bh      | Category           |
|------------|--------------------------------------------------------------------------------------------------------|---------|-----------|--------|----------|-----------|---------|------------------|---------|-------------|-------------|-------------|--------------------|
| GO:0009409 | response to cold                                                                                       | 1       | 30        | 21     | 13332    | 0.0       | 0.002   | 21.16190476      | 3320    | HSP90AA1    | 0.046240307 | 0.075628591 | biological_process |
| GO:0002027 | regulation of heart rate                                                                               | 1       | 30        | 21     | 13332    | 0.0       | 0.002   | 21.16190476      | 6331    | SCN5A       | 0.046240307 | 0.075628591 | biological_process |
| GO:0002931 | response to ischemia                                                                                   | 1       | 30        | 21     | 13332    | 0.0       | 0.002   | 21.16190476      | 2697    | GJA1        | 0.046240307 | 0.075628591 | biological_process |
| GO:0048469 | cell maturation                                                                                        | 1       | 30        | 21     | 13332    | 0.0       | 0.002   | 21.16190476      | 860     | RUNX2       | 0.046240307 | 0.075628591 | biological_process |
| GO:0001205 | transcriptional activator activity, RNA polymerase II distal enhancer<br>sequence-specific DNA binding | 1       | 30        | 20     | 12391    | 0.0       | 0.002   | 20.65166667      | 4780    | NFE2L2      | 0.047360007 | 0.091305485 | molecular_function |
| GO:0030332 | cyclin binding                                                                                         | 1       | 30        | 20     | 12391    | 0.0       | 0.002   | 20.65166667      | 1017    | CDK2        | 0.047360007 | 0.091305485 | molecular_function |
| GO:0046875 | ephrin receptor binding                                                                                | 1       | 30        | 20     | 12391    | 0.0       | 0.002   | 20.65166667      | 5294    | PIK3CG      | 0.047360007 | 0.091305485 | molecular_function |
| GO:0042110 | T cell activation                                                                                      | 1       | 30        | 22     | 13332    | 0.0       | 0.002   | 20.2             | 5294    | PIK3CG      | 0.048389867 | 0.078102943 | biological_process |
| GO:0048701 | embryonic cranial skeleton morphogenesis                                                               | 1       | 30        | 22     | 13332    | 0.0       | 0.002   | 20.2             | 860     | RUNX2       | 0.048389867 | 0.078102943 | biological_process |
| GO:1901215 | negative regulation of neuron death                                                                    | 1       | 30        | 22     | 13332    | 0.0       | 0.002   | 20.2             | 6818    | SULT1A3     | 0.048389867 | 0.078102943 | biological_process |
| GO:0032993 | protein-DNA complex                                                                                    | 1       | 30        | 25     | 14857    | 0.0       | 0.002   | 19.80933333      | 4780    | NFE2L2      | 0.049315656 | 0.182878891 | cellular_component |
| GO:0016303 | 1-phosphatidylinositol-3-kinase activity                                                               | 1       | 30        | 21     | 12391    | 0.0       | 0.002   | 19.66825397      | 5294    | PIK3CG      | 0.049670184 | 0.091305485 | molecular_function |
| GO:0008234 | cysteine-type peptidase activity                                                                       | 1       | 30        | 21     | 12391    | 0.0       | 0.002   | 19.66825397      | 840     | CASP7       | 0.049670184 | 0.091305485 | molecular_function |
| GO:0001784 | phosphotyrosine residue binding                                                                        | 1       | 30        | 21     | 12391    | 0.0       | 0.002   | 19.66825397      | 5921    | RASA1       | 0.049670184 | 0.091305485 | molecular_function |
| GO:0017025 | TBP-class protein binding                                                                              | 1       | 30        | 21     | 12391    | 0.0       | 0.002   | 19.66825397      | 196     | AHR         | 0.049670184 | 0.091305485 | molecular_function |
