# Supplementary material for: Identifying the Mechanism of Polygoni Cuspidati Rhizoma et Radix in Treating Acute Liver Failure Based on Network Pharmacology and Molecular Docking
Source: Hindawi journal article supplement (doi:10.1155/2022/2021066), 2022-04-08
Supplement: f1 [file 2021066.f1.zip]

Supplementary file

Table S5. Kyoto Encyclopedia of Genes and Genomes pathway enrichment analysis

| Term_ID       | Term_description                                     | ListHit | ListTotal | PopHit | PopTotal | GeneRatio  | BgRatio    | Enrichment_score | GeneIds                                                                                                                                                                                                                                                                                                   | GeneSymbols                                                                                                                                                                                                                                                                                                                                        | p-value  | FDR_bh   | Classification_level1 |
|---------------|------------------------------------------------------|---------|-----------|--------|----------|------------|------------|------------------|-----------------------------------------------------------------------------------------------------------------------------------------------------------------------------------------------------------------------------------------------------------------------------------------------------------|----------------------------------------------------------------------------------------------------------------------------------------------------------------------------------------------------------------------------------------------------------------------------------------------------------------------------------------------------|----------|----------|-----------------------|
| path:hsa05200 | Pathways in cancer                                   | 62      | 145       | 523    | 7246     | 0.42758621 | 0.07217775 | 5.924071998      | 4233;3558;5468;1029;4780;4792;862;1950;5578;5743;2099;841;836;2064;2100;4318;5894;598;207;7157;3565;595;1869;5594;5728;2932;596;840;147;1956;1728;6256;581;3481;3569;2944;3458;4313;3725;4193;3320;3162;5579;842;11186;5970;7040;4312;3091;332;1019;4843;2353;6772;1026;7422;4609;2950;367;3576;1017;5925 | MET;IL2;PPARG;CDKN2A;NFE2L2;NFKBIA;RUNX1T1;EGF;PRKCA;PTGS2;ESR1;CASP8;CASP3;ERBB2;ESR2;MMP9;RAF1;BCL2L1;AKT1;TP53;IL4;CCND1;E2F1;MAPK1;PTEN;GSK3B;BCL2;CASP7;CHUK;EGFR;NQO1;RXRA;BAX;IGF2;IL6;GSTM1;IFNG;MMP2;JUN;MDM2;HSP90AA1;HMOX1;PRKCB;CASP9;RASSF1;RELA;TGFB1;MMP1;HIF1A;BIRC5;CDK4;NOS2;FOXS;STAT1;CDKN1A;VEGFA;MYC;GSTP1;AR;CXCL8;CDK2;RB1 | 1.40E-33 | 3.43E-31 | Human Diseases        |
| path:hsa04933 | AGE-RAGE signaling pathway in diabetic complications | 31      | 145       | 99     | 7246     | 0.2137931  | 0.01366271 | 15.64792755      | 6401;5578;5054;836;6347;207;4846;3383;595;1277;5594;596;1281;581;3569;4313;3725;7124;5579;3552;5970;7040;1019;1432;2152;6772;7056;7422;3553;7412;3576                                                                                                                                                     | SELE;PRKCA;SERPINE1;CASP3;CCL2;AKT1;NOS3;ICAM1;CCND1;COL1A1;MAPK1;BCL2;COL3A1;BAX;IL6;MMP2;JUN;TNF;PRKCB;IL1A;RELA;TGFB1;CDK4;MAPK14;F3;STAT1;THBD;VEGFA;IL1B;VCAM1;CXCL8                                                                                                                                                                          | 1.17E-29 | 1.43E-27 | Human Diseases        |
| path:hsa05161 | Hepatitis B                                          | 33      | 145       | 143    | 7246     | 0.22758621 | 0.01973503 | 11.53209549      | 4792;5578;841;836;4318;5894;207;7157;595;1869;5594;5728;596;1147;581;3569;3725;7124;842;5579;5970;7040;332;1019;2353;6772;1026;4609;890;3576;1017;5111;5925                                                                                                                                               | NFKBIA;PRKCA;CASP8;CASP3;MMP9;RAF1;AKT1;TP53;CCND1;E2F1;MAPK1;PTEN;BCL2;CHUK;BAX;IL6;JUN;TNF;CASP9;PRKCB;RELA;TGFB1;BIRC5;CDK4;FOXS;STAT1;CDKN1A;MYC;CCNA2;CXCL8;CDK2;PCNA;RB1                                                                                                                                                                     | 9.43E-27 | 7.67E-25 | Human Diseases        |
| path:hsa05215 | Prostate cancer                                      | 27      | 145       | 97     | 7246     | 0.1862069  | 0.0133867  | 13.90984714      | 1950;4792;5327;2064;4318;4314;5894;207;5328;7157;595;1869;5594;5728;2932;596;1147;1956;4193;3320;842;5970;1026;2950;367;1017;5925                                                                                                                                                                         | EGF;NFKBIA;PLAT;ERBB2;MMP9;MMP3;RAF1;AKT1;PLAU;TP53;CCND1;E2F1;MAPK1;PTEN;GSK3B;BCL2;CHUK;EGFR;MDM2;HSP90AA1;CASP9;RELA;CDKN1A;GSTP1;AR;CDK2;RB1                                                                                                                                                                                                   | 2.61E-24 | 1.59E-22 | Human Diseases        |
| path:hsa05219 | Bladder cancer                                       | 20      | 145       | 41     | 7246     | 0.13793103 | 0.00565829 | 24.37678722      | 1029;1950;2064;4318;5894;7157;595;1869;5594;1956;4313;4193;11186;4312;1019;1026;7422;4609;3576;5925                                                                                                                                                                                                       | CDKN2A;EGF;ERBB2;MMP9;RAF1;TP53;CCND1;E2F1;MAPK1;EGFR;MMP2;MDM2;RASSF1;MMP1;CDK4;CDKN1A;VEGFA;MYC;CXCL8;RB1                                                                                                                                                                                                                                        | 5.23E-24 | 2.55E-22 | Human Diseases        |
| path:hsa05418 | Fluid shear stress and atherosclerosis               | 30      | 145       | 136    | 7246     | 0.20689655 | 0.01876898 | 11.02332657      | 6401;653361;4780;5327;6347;4318;207;4846;7157;3383;596;1147;1728;3458;2944;4313;3725;3320;7124;3162;3552;5970;857;2353;1432;7056;7422;3553;2950;7412                                                                                                                                                      | SELE;NCF1;NFE2L2;PLAT;CCL2;MMP9;AKT1;NOS3;TP53;ICAM1;BCL2;CHUK;NQO1;IFNG;GSTM1;MMP2;JUN;HSP90AA1;TNF;HMOX1;IL1A;RELA;CAV1;FOS;MAPK14;THBD;VEGFA;IL1B;GSTP1;VCAM1                                                                                                                                                                                   | 1.05E-23 | 4.29E-22 | Human Diseases        |
| path:hsa04657 | IL-17 signaling pathway                              | 24      | 145       | 93     | 7246     | 0.16551724 | 0.01283467 | 12.89610679      | 3627;4792;5743;841;836;6347;4318;4314;3565;5594;2932;1147;3458;3569;3725;3320;2920;7124;5970;4312;353;1432;3553;3576                                                                                                                                                                                      | CXCL10;NFKBIA;PTGS2;CASP8;CASP3;CCL2;MMP9;MMP3;IL4;MAPK1;GSK3B;CHUK;IFNG;IL6;JUN;HSP90AA1;CXCL2;TNF;RELA;MMP1;FOS;MAPK14;IL1B;CXCL8                                                                                                                                                                                                                | 8.34E-21 | 2.91E-19 | Organismal Systems    |
| path:hsa05167 | Kaposi sarcoma-associated herpesvirus infection      | 30      | 145       | 186    | 7246     | 0.20689655 | 0.02566933 | 8.060066741      | 5294;4792;5743;841;836;5894;207;7157;3383;595;1869;5594;2932;1147;581;3569;3725;2920;842;5970;3091;1019;1432;2353;6772;1026;7422;4609;3576;5925                                                                                                                                                           | PIK3CG;NFKBIA;PTGS2;CASP8;CASP3;RAF1;AKT1;TP53;ICAM1;CCND1;E2F1;MAPK1;GSK3B;CHUK;BAX;IL6;JUN;CXCL2;CASP9;RELA;HIF1A;CDK4;MAPK14;FOS;STAT1;CDKN1A;VEGFA;MYC;CXCL8;RB1                                                                                                                                                                               | 1.54E-19 | 4.70E-18 | Human Diseases        |

| Term_ID       | Term_description                | ListHit | ListTotal | PopHit | PopTotal | GeneRatio  | BgRatio    | Enrichment_score | GeneIds                                                                                                                                              | GeneSymbols                                                                                                                                                    | p-value  | FDR_bh   | Classification_level1                |
|---------------|---------------------------------|---------|-----------|--------|----------|------------|------------|------------------|------------------------------------------------------------------------------------------------------------------------------------------------------|----------------------------------------------------------------------------------------------------------------------------------------------------------------|----------|----------|--------------------------------------|
| path:hsa05212 | Pancreatic cancer               | 21      | 145       | 75     | 7246     | 0.14482759 | 0.01035054 | 13.99227586      | 1029;1950;2064;5894;598;207;7157;595;1869;5594;1147;1956;581;842;5970;7040;1019;6772;1026;7422;5925                                                  | CDKN2A;EGF;ERBB2;RAF1;BCL2L1;AKT1;TP53;CCND1;E2F1;MAPK1;CHUK;EGFR;BAX;CASP9;RELA;TGFB1;CDK4;STAT1;CDKN1A;VEGFA;RB1                                             | 4.10E-19 | 1.11E-17 | Human Diseases                       |
| path:hsa04668 | TNF signaling pathway           | 24      | 145       | 110    | 7246     | 0.16551724 | 0.01518079 | 10.9030721       | 3627;6401;4792;5743;841;836;6347;4318;4314;3659;207;3383;5594;840;1147;3569;3725;2920;7124;5970;2353;1432;3553;7412                                  | CXCL10;SELE;NFKBIA;PTGS2;CASP8;CASP3;CCL2;MMP9;MMP3;IRF1;AKT1;ICAM1;MAPK1;CASP7;CHUK;IL6;JUN;CXCL2;TNF;RELA;FOS;MAPK14;IL1B;VCAM1                              | 6.13E-19 | 1.49E-17 | Environmental Information Processing |
| path:hsa05163 | Human cytomegalovirus infection | 31      | 145       | 223    | 7246     | 0.2137931  | 0.0307756  | 6.946837792      | 1029;4792;5743;5578;841;836;6347;5894;207;7157;595;1869;5594;2932;1147;1956;581;3569;4193;7124;842;5579;5970;1019;1432;1026;7422;3553;4609;3576;5925 | CDKN2A;NFKBIA;PTGS2;PRKCA;CASP8;CASP3;CCL2;RAF1;AKT1;TP53;CCND1;E2F1;MAPK1;GSK3B;CHUK;EGFR;BAX;IL6;MDM2;TNF;CASP9;PRKCB;RELA;CDK4;MAPK14;CDKN1A;VEGFA;IL1B;MYC | 3.14E-18 | 6.96E-17 | Human Diseases                       |
| path:hsa01522 | Endocrine resistance            | 22      | 145       | 96     | 7246     | 0.15172414 | 0.01324869 | 11.45201149      | 1029;2099;2064;2100;4318;5894;207;7157;595;1869;5594;596;1956;581;4313;3725;4193;1019;1432;2353;1026;5925                                            | CDKN2A;ESR1;ERBB2;ESR2;MMP9;RAF1;AKT1;TP53;CCND1;E2F1;MAPK1;BCL2;EGFR;BAX;MMP2;JUN;MDM2;CDK4;MAPK14;FOS;CDKN1A;RB1                                             | 6.45E-18 | 1.31E-16 | Human Diseases                       |
| path:hsa05206 | MicroRNAs in cancer             | 26      | 145       | 150    | 7246     | 0.17931034 | 0.02070108 | 8.661885057      | 4233;1029;5743;5578;836;2064;4318;5894;5328;7157;595;1545;1869;5594;5728;596;1956;2065;4193;3162;5579;11186;4170;1026;7422;4609                      | MET;CDKN2A;PTGS2;PRKCA;CASP3;ERBB2;MMP9;RAF1;PLAU;TP53;CCND1;CYP1B1;E2F1;MAPK1;PTEN;BCL2;EGFR;ERBB3;MDM2;HMOX1;PRKCB;RASSF1;MCML1;CDKN1A;VEGFA;MYC             | 8.36E-18 | 1.57E-16 | Human Diseases                       |
| path:hsa05223 | Non-small cell lung cancer      | 19      | 145       | 66     | 7246     | 0.13103448 | 0.00910847 | 14.38599791      | 1029;1950;5578;2064;5894;207;7157;595;1869;5594;1956;6256;581;842;5579;11186;1019;1026;5925                                                          | CDKN2A;EGF;PRKCA;ERBB2;RAF1;AKT1;TP53;CCND1;E2F1;MAPK1;EGFR;RXRA;BAX;CASP9;PRKCB;RASSF1;CDK4;CDKN1A;RB1                                                        | 1.25E-17 | 2.17E-16 | Human Diseases                       |
| path:hsa04218 | Cellular senescence             | 26      | 145       | 158    | 7246     | 0.17931034 | 0.02180513 | 8.223308599      | 11200;1029;5054;5894;207;7157;595;1869;5594;5728;3569;4193;3486;3552;5970;7040;891;1019;1432;1026;4609;1111;890;3576;1017;5925                       | CHEK2;CDKN2A;SERPINE1;RAF1;AKT1;TP53;CCND1;E2F1;MAPK1;PTEN;IL6;MDM2;IGFBP3;IL1A;RELA;TGFB1;CCNB1;CDK4;MAPK14;CDKN1A;MYC;CHEK1;CCNA2;CXCL8;CDK2;RB1             | 3.21E-17 | 5.22E-16 | Cellular Processes                   |
| path:hsa05222 | Small cell lung cancer          | 21      | 145       | 93     | 7246     | 0.14482759 | 0.01283467 | 11.28409344      | 4792;5743;836;598;207;7157;595;1869;5728;596;1147;6256;581;842;5970;4843;1019;1026;4609;1017;5925                                                    | NFKBIA;PTGS2;CASP3;BCL2L1;AKT1;TP53;CCND1;E2F1;PTEN;BCL2;CHUK;RXRA;BAX;CASP9;RELA;NOS2;CDK4;CDKN1A;MYC;CDK2;RB1                                                | 5.35E-17 | 8.15E-16 | Human Diseases                       |
| path:hsa04115 | p53 signaling pathway           | 19      | 145       | 72     | 7246     | 0.13103448 | 0.00993652 | 13.18716475      | 11200;1029;5054;836;841;598;7157;595;5728;596;581;4193;842;3486;891;1019;1026;1111;1017                                                              | CHEK2;CDKN2A;SERPINE1;CASP3;CASP8;BCL2L1;TP53;CCND1;PTEN;BCL2;BAX;MDM2;CASP9;IGFBP3;CCNB1;CDK4;CDKN1A;CHEK1;CDK2                                               | 7.67E-17 | 1.10E-15 | Cellular Processes                   |
| path:hsa05225 | Hepatocellular carcinoma        | 26      | 145       | 165    | 7246     | 0.17931034 | 0.02277118 | 7.874440961      | 4233;1029;4780;5578;5894;598;207;7157;595;1869;5594;5728;2932;1956;1728;581;3481;2944;3162;5579;7040;1019;1026;4609;2950;5925                        | MET;CDKN2A;NFE2L2;PRKCA;RAF1;BCL2L1;AKT1;TP53;CCND1;E2F1;MAPK1;PTEN;GSK3B;EGFR;NQO1;BAX;IGF2;GSTM1;HMOX1;PRKCB;TGFB1;CDK4;CDKN1A;MYC;GSTP1;RB1                 | 9.75E-17 | 1.32E-15 | Human Diseases                       |

| Term_ID       | Term_description                          | ListHit | ListTotal | PopHit | PopTotal | GeneRatio  | BgRatio    | Enrichment_score | GeneIds                                                                                                                                                                        | GeneSymbols                                                                                                                                                                                      | p-value  | FDR_bh   | Classification_level1                |
|---------------|-------------------------------------------|---------|-----------|--------|----------|------------|------------|------------------|--------------------------------------------------------------------------------------------------------------------------------------------------------------------------------|--------------------------------------------------------------------------------------------------------------------------------------------------------------------------------------------------|----------|----------|--------------------------------------|
| path:hsa04151 | PI3K-Akt signaling pathway                | 36      | 145       | 353    | 7246     | 0.24827586 | 0.04871653 | 5.096336817      | 4233;5294;3558;1950;5578;3643;2064;5894;598;6696;207;4846;7157;3565;595;1277;5594;5728;2932;596;1147;1956;6256;3481;3569;2065;4193;3320;842;5970;4170;1019;1026;7422;4609;1017 | MET;PIK3CG;IL2;EGF;PRKCA;INSR;ERBB2;RAF1;BCL2L1;SPP1;AKT1;NOS3;TP53;IL4;CCND1;COL1A1;MAPK1;PTEN;GSK3B;BCL2;CHUK;EGFR;RXRA;IGF2;IL6;ERBB3;MDM2;HSP90AA1;CASP9;RELA;MYC;CDK4;CDKN1A;VEGFA;MYC;CDK2 | 1.22E-16 | 1.57E-15 | Environmental Information Processing |
| path:hsa05140 | Leishmaniasis                             | 18      | 145       | 70     | 7246     | 0.12413793 | 0.0096605  | 12.85004926      | 3458;4843;2353;1432;3725;6772;3565;653361;3553;4792;5743;3586;7124;5594;5579;3552;5970;7040                                                                                    | IFNG;NOS2;FOS;MAPK14;JUN;STAT1;IL4;NCF1;IL1B;NFKBIA;PTGS2;IL10;TNF;MAPK1;PRKCB;IL1A;RELA;TGFB1                                                                                                   | 8.70E-16 | 1.06E-14 | Human Diseases                       |
| path:hsa04066 | HIF-1 signaling pathway                   | 20      | 145       | 100    | 7246     | 0.13793103 | 0.01380072 | 9.994482759      | 3099;1950;5578;3643;5054;2064;2074;4846;5594;596;1956;3458;3569;3162;5579;5970;3091;4843;1026;7422                                                                             | HK2;EGF;PRKCA;INSR;SERPINE1;ERBB2;AKT1;NOS3;MAPK1;BCL2;EGFR;IFNG;IL6;HMOX1;PRKCB;RELA;HIF1A;NOS2;CDKN1A;VEGFA                                                                                    | 3.89E-15 | 4.52E-14 | Environmental Information Processing |
| path:hsa05220 | Chronic myeloid leukemia                  | 18      | 145       | 76     | 7246     | 0.12413793 | 0.01048855 | 11.83557169      | 581;5894;598;1019;1029;207;7157;4193;1026;595;4792;4609;1147;1869;5594;5970;7040;5925                                                                                          | BAX;RAF1;BCL2L1;CDK4;CDKN2A;AKT1;TP53;MDM2;CDKN1A;CCND1;NFKBIA;MYC;CHUK;E2F1;MAPK1;RELA;TGFB1;RB1                                                                                                | 4.25E-15 | 4.71E-14 | Human Diseases                       |
| path:hsa05142 | Chagas disease (American trypanosomiasis) | 20      | 145       | 101    | 7246     | 0.13793103 | 0.01393872 | 9.895527484      | 3558;4792;841;5054;3586;6347;207;5594;1147;3458;3569;3725;7124;5970;7040;4843;2353;1432;3553;3576                                                                              | IL2;NFKBIA;CASP8;SERPINE1;IL10;CCL2;AKT1;MAPK1;CHUK;IFNG;IL6;JUN;TNF;RELA;TGFB1;NOS2;FOS;MAPK14;IL1B;CXCL8                                                                                       | 4.77E-15 | 5.06E-14 | Human Diseases                       |
| path:hsa05169 | Epstein-Barr virus infection              | 26      | 145       | 198    | 7246     | 0.17931034 | 0.02732542 | 6.562034134      | 3627;4792;841;836;207;7157;3383;595;1869;596;1147;581;3569;3725;4193;7124;842;5970;1019;1432;6772;1026;4609;890;1017;5925                                                      | CXCL10;NFKBIA;CASP8;CASP3;AKT1;TP53;ICAM1;CCND1;E2F1;BCL2;CHUK;BAX;IL6;JUN;MDM2;TNF;CASP9;RELA;CDK4;MAPK14;STAT1;CDKN1A;MYC;CCNA2;CDK2;RB1                                                       | 9.38E-15 | 9.15E-14 | Human Diseases                       |
| path:hsa05205 | Proteoglycans in cancer                   | 26      | 145       | 198    | 7246     | 0.17931034 | 0.02732542 | 6.562034134      | 4233;5578;2099;836;2064;4318;5894;207;5328;7157;595;5594;1956;3481;4313;2065;4193;7124;5579;7040;857;3091;1432;1026;7422;4609                                                  | MET;PRKCA;ESR1;CASP3;ERBB2;MMP9;RAF1;AKT1;PLAU;TP53;CCND1;MAPK1;EGFR;IGF2;MMP2;ERBB3;MDM2;TNF;PRKCB;TGFB1;CAV1;HIF1A;MAPK14;CDKN1A;VEGFA;MYC                                                     | 9.38E-15 | 9.15E-14 | Human Diseases                       |
| path:hsa05214 | Glioma                                    | 17      | 145       | 71     | 7246     | 0.11724138 | 0.00979851 | 11.96522584      | 581;5894;1019;1029;207;7157;4193;1026;595;1950;1869;5594;5578;5728;5579;1956;5925                                                                                              | BAX;RAF1;CDK4;CDKN2A;AKT1;TP53;MDM2;CDKN1A;CCND1;EGF;E2F1;MAPK1;PRKCA;PTEN;PRKCB;EGFR;RB1                                                                                                        | 2.11E-14 | 1.91E-13 | Human Diseases                       |
| path:hsa01524 | Platinum drug resistance                  | 17      | 145       | 71     | 7246     | 0.11724138 | 0.00979851 | 11.96522584      | 581;7153;598;332;2944;1029;207;7157;4193;1026;2064;2950;842;5594;836;596;841                                                                                                   | BAX;TOP2A;BCL2L1;BIRC5;GSTM1;CDKN2A;AKT1;TP53;MDM2;CDKN1A;ERBB2;GSTP1;CASP9;MAPK1;CASP3;BCL2;CASP8                                                                                               | 2.11E-14 | 1.91E-13 | Human Diseases                       |
| path:hsa05145 | Toxoplasmosis                             | 20      | 145       | 111    | 7246     | 0.13793103 | 0.0153188  | 9.004038521      | 5294;4792;841;3586;836;959;598;207;5594;596;1147;3458;7124;842;240;5970;7040;4843;1432;6772                                                                                    | PIK3CG;NFKBIA;CASP8;IL10;CASP3;CD40LG;BCL2L1;AKT1;MAPK1;BCL2;CHUK;IFNG;TNF;CASP9;ALOX5;RELA;TGFB1;NOS2;MAPK14;STAT1                                                                              | 3.24E-14 | 2.82E-13 | Human Diseases                       |
| path:hsa05210 | Colorectal cancer                         | 18      | 145       | 86     | 7246     | 0.12413793 | 0.01186862 | 10.45934242      | 581;5894;332;207;2353;3725;7157;1026;595;4609;1950;842;5594;2932;596;836;7040;1956                                                                                             | BAX;RAF1;BIRC5;AKT1;FOS;JUN;TP53;CDKN1A;CCND1;MYC;EGF;CASP9;MAPK1;GSK3B;BCL2;CASP3;TGFB1;EGFR                                                                                                    | 4.37E-14 | 3.68E-13 | Human Diseases                       |
| path:hsa01521 | EGFR tyrosine kinase inhibitor resistance | 17      | 145       | 79     | 7246     | 0.11724138 | 0.01090257 | 10.7535574       | 581;4233;5894;598;3569;207;2065;7422;1950;5578;5594;5579;5728;2932;596;2064;1956                                                                                               | BAX;MET;RAF1;BCL2L1;IL6;AKT1;ERBB3;VEGFA;EGF;PRKCA;MAPK1;PRKCB;PTEN;GSK3B;BCL2;ERBB2;EGFR                                                                                                        | 1.42E-13 | 1.16E-12 | Human Diseases                       |

| Term_ID       | Term_description                         | ListHit | ListTotal | PopHit | PopTotal | GeneRatio  | BgRatio    | Enrichment_score | GeneIds                                                                                                                        | GeneSymbols                                                                                                                              | p-value  | FDR_bh   | Classification_level1                |
|---------------|------------------------------------------|---------|-----------|--------|----------|------------|------------|------------------|--------------------------------------------------------------------------------------------------------------------------------|------------------------------------------------------------------------------------------------------------------------------------------|----------|----------|--------------------------------------|
| path:hsa04210 | Apoptosis                                | 21      | 145       | 135    | 7246     | 0.14482759 | 0.01863097 | 7.77348659       | 4792;841;836;5894;598;207;7157;5594;596;840;1147;581;3725;142;7124;842;5970;4170;332;2353;1509                                 | NFKBIA;CASP8;CASP3;RAF1;BCL2L1;AKT1;TP53;MAPK1;BCL2;CASP7;CHUK;BAX;JUN;PARP1;TNF;CASP9;RELA;MCL1;BIRC5;FOS;CTSD                          | 1.49E-13 | 1.17E-12 | Cellular Processes                   |
| path:hsa05218 | Melanoma                                 | 16      | 145       | 72     | 7246     | 0.11034483 | 0.00993652 | 11.10498084      | 581;4233;5894;1019;1029;207;7157;4193;1026;595;1950;1869;5594;5728;1956;5925                                                   | BAX;MET;RAF1;CDK4;CDKN2A;AKT1;TP53;MDM2;CDKN1A;CCND1;EGF;E2F1;MAPK1;PTEN;EGFR;RB1                                                        | 4.53E-13 | 3.46E-12 | Human Diseases                       |
| path:hsa05224 | Breast cancer                            | 21      | 145       | 147    | 7246     | 0.14482759 | 0.02028705 | 7.138916256      | 5241;1950;2099;2064;2100;5894;207;7157;595;1869;5594;5728;2932;1956;581;3725;1019;2353;1026;4609;5925                          | PGR;EGF;ESR1;ERBB2;ESR2;RAF1;AKT1;TP53;CCND1;E2F1;MAPK1;PTEN;GSK3B;EGFR;BAX;JUN;CDK4;FOS;CDKN1A;MYC;RB1                                  | 8.37E-13 | 6.19E-12 | Human Diseases                       |
| path:hsa04068 | FoxO signaling pathway                   | 20      | 145       | 132    | 7246     | 0.13793103 | 0.01821695 | 7.571577847      | 1950;3643;3586;847;5894;207;595;594;5728;1147;1956;3569;4193;6517;7040;891;6648;1432;1026;1017                                 | EGF;INSR;IL10;CAT;RAF1;AKT1;CCND1;MAPK1;PTEN;CHUK;EGFR;IL6;MDM2;SLC2A4;TGFB1;CCNB1;SOD2;MAPK14;CDKN1A;CDK2                               | 9.89E-13 | 7.10E-12 | Environmental Information Processing |
| path:hsa04625 | C-type lectin receptor signaling pathway | 18      | 145       | 104    | 7246     | 0.12413793 | 0.01435275 | 8.649071618      | 5894;3558;3659;3569;841;3725;207;4193;1432;6772;3553;4792;5743;3586;7124;5594;5970;1147                                        | RAF1;IL2;IRF1;IL6;CASP8;JUN;AKT1;MDM2;MAPK14;STAT1;IL1B;NFKBIA;PTGS2;IL10;TNF;MAPK1;RELA;CHUK                                            | 1.40E-12 | 9.78E-12 | Organismal Systems                   |
| path:hsa05164 | Influenza A                              | 22      | 145       | 169    | 7246     | 0.15172414 | 0.02332321 | 6.505284636      | 3627;4792;5578;6347;5894;207;3383;5594;2932;3458;3569;3725;5644;7124;842;5579;3552;5970;1432;6772;3553;3576                    | CXCL10;NFKBIA;PRKCA;CCL2;RAF1;AKT1;ICAM1;MAPK1;GSK3B;IFNG;IL6;JUN;PRSS1;TNF;CASP9;PRKCB;IL1A;RELA;MAPK14;STAT1;IL1B;CXCL8                | 1.58E-12 | 1.07E-11 | Human Diseases                       |
| path:hsa04659 | Th17 cell differentiation                | 18      | 145       | 105    | 7246     | 0.12413793 | 0.01449075 | 8.566699507      | 3091;3558;3569;3458;1432;3725;6772;3320;2353;3565;3553;4792;1147;196;5594;5970;7040;6256                                       | HIF1A;IL2;IL6;IFNG;MAPK14;JUN;STAT1;HSP90AA1;FOS;IL4;IL1B;NFKBIA;CHUK;AHR;MAPK1;RELA;TGFB1;RXRA                                          | 1.67E-12 | 1.10E-11 | Organismal Systems                   |
| path:hsa05166 | Human T-cell leukemia virus 1 infection  | 26      | 145       | 253    | 7246     | 0.17931034 | 0.03491582 | 5.135504975      | 3558;11200;1029;4792;598;207;7157;3383;595;1869;2932;1147;581;3569;3725;7124;5970;7040;1019;2353;1026;4609;1111;7412;5111;5925 | IL2;CHEK2;CDKN2A;NFKBIA;BCL2L1;AKT1;TP53;ICAM1;CCND1;E2F1;GSK3B;CHUK;BAX;IL6;JUN;TNF;RELA;TGFB1;CDK4;FOS;CDKN1A;MYC;CHEK1;VCAM1;PCNA;RB1 | 3.29E-12 | 2.11E-11 | Human Diseases                       |
| path:hsa05213 | Endometrial cancer                       | 14      | 145       | 58     | 7246     | 0.09655172 | 0.00800442 | 12.06230678      | 581;5894;207;7157;1026;595;4609;1950;842;5594;5728;2932;2064;1956                                                              | BAX;RAF1;AKT1;TP53;CDKN1A;CCND1;MYC;EGF;CASP9;MAPK1;PTEN;GSK3B;ERBB2;EGFR                                                                | 4.19E-12 | 2.62E-11 | Human Diseases                       |
| path:hsa05144 | Malaria                                  | 13      | 145       | 49     | 7246     | 0.08965517 | 0.00676235 | 13.25798733      | 4233;6347;959;3458;3569;6401;3383;3553;7124;7412;3586;7040;3576                                                                | MET;CCL2;CD40LG;IFNG;IL6;SELE;ICAM1;IL1B;TNF;VCAM1;IL10;TGFB1;CXCL8                                                                      | 6.80E-12 | 4.15E-11 | Human Diseases                       |
| path:hsa04926 | Relaxin signaling pathway                | 19      | 145       | 130    | 7246     | 0.13103448 | 0.01794093 | 7.303660477      | 4792;5578;4318;5894;207;4846;1277;5594;1956;1281;4313;3725;5970;7040;4312;4843;2353;1432;7422                                  | NFKBIA;PRKCA;MMP9;RAF1;AKT1;NOS3;COL1A1;MAPK1;EGFR;COL3A1;MMP2;JUN;RELA;TGFB1;MMP1;NOS2;FOS;MAPK14;VEGFA                                 | 7.40E-12 | 4.40E-11 | Organismal Systems                   |
| path:hsa04660 | T cell receptor signaling pathway        | 17      | 145       | 101    | 7246     | 0.11724138 | 0.01393872 | 8.411198361      | 959;5894;3558;3458;1019;207;3725;1432;2353;3565;4792;7124;3586;5594;2932;5970;1147                                             | CD40LG;RAF1;IL2;IFNG;CDK4;AKT1;JUN;MAPK14;FOS;IL4;NFKBIA;TNF;IL10;MAPK1;GSK3B;RELA;CHUK                                                  | 9.81E-12 | 5.70E-11 | Organismal Systems                   |
| path:hsa05133 | Pertussis                                | 15      | 145       | 76     | 7246     | 0.10344828 | 0.01048855 | 9.862976407      | 3569;3659;1432;3725;4843;2353;840;3553;7124;3586;3552;5594;836;5970;3576                                                       | IL6;IRF1;MAPK14;JUN;NOS2;FOS;CASP7;IL1B;TNF;IL10;IL1A;MAPK1;CASP3;RELA;CXCL8                                                             | 1.59E-11 | 9.04E-11 | Human Diseases                       |

| Term_ID       | Term_description                        | ListHit | ListTotal | PopHit | PopTotal | GeneRatio  | BgRatio    | Enrichment_score | GeneIds                                                                                                                               | GeneSymbols                                                                                                                                         | p-value  | FDR_bh   | Classification_level1                |
|---------------|-----------------------------------------|---------|-----------|--------|----------|------------|------------|------------------|---------------------------------------------------------------------------------------------------------------------------------------|-----------------------------------------------------------------------------------------------------------------------------------------------------|----------|----------|--------------------------------------|
| path:hsa04010 | MAPK signaling pathway                  | 27      | 145       | 295    | 7246     | 0.1862069  | 0.04071212 | 4.573746347      | 4233;1950;5578;3643;836;2064;5894;207;7157;5594;1147;1956;3481;3725;2065;7124;5579;3552;5970;7040;2353;1432;7422;3553;4609;3315;5921  | MET;EGF;PRKCA;INSR;CASP3;ERBB2;RAF1;AKT1;TP53;MAPK1;CHUK;EGFR;IGF2;JUN;ERBB3;TNF;PRKCB;IL1A;RELA;TGFB1;FOS;MAPK14;VEGFA;IL1B;MYC;HSPB1;RASA1        | 1.87E-11 | 1.04E-10 | Environmental Information Processing |
| path:hsa04064 | NF-kappa B signaling pathway            | 16      | 145       | 93     | 7246     | 0.11034483 | 0.01283467 | 8.597404524      | 959;598;5328;142;3383;2920;3553;4792;5743;7124;5579;7412;596;5970;1147;3576                                                           | CD40LG;BCL2L1;PLAU;PARP1;ICAM1;CXCL2;IL1B;NFKBIA;PTGS2;TNF;PRKCB;VCAM1;BCL2;RELA;CHUK;CXCL8                                                         | 2.93E-11 | 1.59E-10 | Environmental Information Processing |
| path:hsa05226 | Gastric cancer                          | 19      | 145       | 148    | 7246     | 0.13103448 | 0.02042506 | 6.415377446      | 4233;1950;2064;5894;207;7157;595;1869;5594;2932;596;1956;6256;581;7040;1026;4609;1017;5925                                            | MET;EGF;ERBB2;RAF1;AKT1;TP53;CCND1;E2F1;MAPK1;GSK3B;BCL2;EGFR;RXRA;BAX;TGFB1;CDKN1A;MYC;CDK2;RB1                                                    | 7.65E-11 | 4.06E-10 | Human Diseases                       |
| path:hsa05160 | Hepatitis C                             | 18      | 145       | 131    | 7246     | 0.12413793 | 0.01807894 | 6.866438536      | 5894;3659;207;1432;7157;6772;1026;1950;4792;5465;7124;5594;2932;5970;1147;3576;1956;6256                                              | RAF1;IRF1;AKT1;MAPK14;TP53;STAT1;CDKN1A;EGF;NFKBIA;PPARA;TNF;MAPK1;GSK3B;RELA;CHUK;CXCL8;EGFR;RXRA                                                  | 7.94E-11 | 4.12E-10 | Human Diseases                       |
| path:hsa05165 | Human papillomavirus infection          | 28      | 145       | 339    | 7246     | 0.19310345 | 0.04678443 | 4.127515004      | 1950;5743;841;836;5894;3659;6696;207;7157;595;1277;1869;5594;5728;2932;1147;1956;581;4193;7124;5970;1019;6772;1026;7422;890;1017;5925 | EGF;PTGS2;CASP8;CASP3;RAF1;IRF1;SP1;AKT1;TP53;CCND1;COL1A1;E2F1;MAPK1;PTEN;GSK3B;CHUK;EGFR;BAX;MDM2;TNF;RELA;CDK4;STAT1;CDKN1A;VEGFA;CCNA2;CDK2;RB1 | 8.74E-11 | 4.44E-10 | Human Diseases                       |
| path:hsa04620 | Toll-like receptor signaling pathway    | 16      | 145       | 102    | 7246     | 0.11034483 | 0.01407673 | 7.838810007      | 3627;3569;6696;841;3725;207;1432;6772;2353;3553;4792;7124;5594;5970;1147;3576                                                         | CXCL10;IL6;SPP1;CASP8;JUN;AKT1;MAPK14;STAT1;FOS;IL1B;NFKBIA;TNF;MAPK1;RELA;CHUK;CXCL8                                                               | 1.25E-10 | 6.24E-10 | Organismal Systems                   |
| path:hsa05152 | Tuberculosis                            | 20      | 145       | 175    | 7246     | 0.13793103 | 0.02415126 | 5.711133005      | 841;3586;836;5894;207;5594;596;581;3458;3569;7124;842;3552;5970;7040;4843;1432;6772;1509;3553                                         | CASP8;IL10;CASP3;RAF1;AKT1;MAPK1;BCL2;BAX;IFNG;IL6;TNF;CASP9;IL1A;RELA;TGFB1;NOS2;MAPK14;STAT1;CTSD                                                 | 1.99E-10 | 9.71E-10 | Human Diseases                       |
| path:hsa04110 | Cell cycle                              | 17      | 145       | 124    | 7246     | 0.11724138 | 0.01711289 | 6.85105673       | 11200;1019;1029;7157;4193;1026;595;4609;1111;1869;2932;890;7040;891;1017;5111;5925                                                    | IL1B;CHEK2;CDK4;CDKN2A;TP53;MDM2;CDKN1A;CCND1;MYC;CHEK1;E2F1;GSK3B;CCNA2;TGFB1;CCNB1;CDK2;PCNA;RB1                                                  | 2.87E-10 | 1.37E-09 | Cellular Processes                   |
| path:hsa05146 | Amoebiasis                              | 15      | 145       | 95     | 7246     | 0.10344828 | 0.01311068 | 7.890381125      | 3458;3569;4843;3553;1277;7124;3586;5578;5579;836;3315;5970;7040;3576;1281                                                             | IFNG;IL6;NOS2;IL1B;COL1A1;TNF;IL10;PRKCA;PRKCB;CASP3;HSPB1;RELA;TGFB1;CXCL8;COL3A1                                                                  | 4.47E-10 | 2.10E-09 | Human Diseases                       |
| path:hsa05202 | Transcriptional misregulation in cancer | 20      | 145       | 185    | 7246     | 0.13793103 | 0.02553133 | 5.402423113      | 4233;5468;862;5327;860;4318;4314;598;5328;7157;6256;581;3569;4193;3486;4353;5970;1026;4609;3576                                       | MET;PPARG;RUNX1T1;PLAT;RUNX2;MMP9;MMP3;BCL2L1;PLAU;TP53;RXRA;BAX;IL6;MDM2;IGFBP3;MPO;RELA;CDKN1A;MYC;CXCL8                                          | 5.44E-10 | 2.51E-09 | Human Diseases                       |
| path:hsa05143 | African trypanosomiasis                 | 10      | 145       | 34     | 7246     | 0.06896552 | 0.00469224 | 14.69776876      | 3458;3569;6401;3383;3553;7124;5578;7412;5579;3586                                                                                     | IFNG;IL6;SELE;ICAM1;IL1B;TNF;PRKCA;VCAM1;PRKCB;IL10                                                                                                 | 6.56E-10 | 2.96E-09 | Human Diseases                       |
| path:hsa04919 | Thyroid hormone signaling pathway       | 16      | 145       | 116    | 7246     | 0.11034483 | 0.01600883 | 6.89274673       | 3091;5894;2099;207;7157;6772;4193;595;4609;842;5578;5594;5579;2932;10499;6256                                                         | HIF1A;RAF1;ESR1;AKT1;TP53;STAT1;MDM2;CCND1;MYC;CASP9;PRKCA;MAPK1;PRKCB;GSK3B;NCOA2;RXRA                                                             | 9.05E-10 | 4.01E-09 | Organismal Systems                   |
| path:hsa05323 | Rheumatoid arthritis                    | 14      | 145       | 86     | 7246     | 0.09655172 | 0.01186862 | 8.135044106      | 6347;4314;3458;3569;2353;3725;3383;7422;3553;7124;3552;7040;3576;4312                                                                 | CCL2;MMP3;IFNG;IL6;FOS;JUN;ICAM1;VEGFA;IL1B;TNF;IL1A;TGFB1;CXCL8;MMP1                                                                               | 1.16E-09 | 5.06E-09 | Human Diseases                       |
| path:hsa04915 | Estrogen signaling pathway              | 17      | 145       | 136    | 7246     | 0.11724138 | 0.01876898 | 6.246551724      | 2100;4318;5894;207;4846;4313;3725;1509;10499;3320;2353;5241;4988;5594;2099;596;1956                                                   | ESR2;MMP9;RAF1;AKT1;NOS3;MMP2;JUN;CTSD;NCOA2;HSP90AA1;FOS;PGR;OPRM1;MAPK1;ESR1;BCL2;EGFR                                                            | 1.25E-09 | 5.35E-09 | Organismal Systems                   |

| Term_ID       | Term_description                          | ListHit | ListTotal | PopHit | PopTotal | GeneRatio  | BgRatio    | Enrichment_score | GeneIds                                                                                     | GeneSymbols                                                                                                   | p-value  | FDR_bh   | Classification_level1                |
|---------------|-------------------------------------------|---------|-----------|--------|----------|------------|------------|------------------|---------------------------------------------------------------------------------------------|---------------------------------------------------------------------------------------------------------------|----------|----------|--------------------------------------|
| path:hsa04380 | Osteoclast differentiation                | 16      | 145       | 125    | 7246     | 0.11034483 | 0.0172509  | 6.396468966      | 3458;5468;207;1432;3725;6772;2353;653361;3553;4792;1147;7124;3552;5594;5970;7040            | IFNG;PPARG;AKT1;MAPK14;JUN;STAT1;FOS;NCF1;IL1B;NFKBIA;CHUK;TNF;IL1A;MAPK1;RELA;TGFB1                          | 2.78E-09 | 1.17E-08 | Organismal Systems                   |
| path:hsa05321 | Inflammatory bowel disease (IBD)          | 12      | 145       | 63     | 7246     | 0.08275862 | 0.00869445 | 9.518555008      | 3558;3569;3458;3725;6772;3565;3553;7124;3586;3552;5970;7040                                 | IL2;IL6;IFNG;JUN;STAT1;IL4;IL1B;TNF;IL10;IL1A;RELA;TGFB1                                                      | 2.90E-09 | 1.20E-08 | Human Diseases                       |
| path:hsa04932 | Non-alcoholic fatty liver disease (NAFLD) | 17      | 145       | 145    | 7246     | 0.11724138 | 0.02001104 | 5.858834721      | 581;3569;841;207;3725;840;3553;7124;3552;3643;836;2932;5970;7040;3576;5465;6256             | BAX;IL6;CASP8;AKT1;JUN;CASP7;IL1B;TNF;IL1A;INSR;CASP3;GSK3B;RELA;TGFB1;CXCL8;PPARA;RXRA                       | 3.41E-09 | 1.39E-08 | Human Diseases                       |
| path:hsa05170 | Human immunodeficiency virus 1 infection  | 20      | 145       | 211    | 7246     | 0.13793103 | 0.02911951 | 4.736721687      | 4792;5578;841;836;5894;598;207;5594;596;1147;581;3725;7124;842;5579;5970;891;2353;1432;1111 | NFKBIA;PRKCA;CASP8;CASP3;RAF1;BCL2L1;AKT1;MAPK1;BCL2;CHUK;BAX;JUN;TNF;CASP9;PRKCB;RELA;CCNB1;FOS;MAPK14;CHEK1 | 5.58E-09 | 2.20E-08 | Human Diseases                       |
| path:hsa05162 | Measles                                   | 16      | 145       | 131    | 7246     | 0.11034483 | 0.01807894 | 6.103500921      | 3558;3569;1019;207;7157;6772;3458;3565;595;4792;3553;3552;2932;5970;1147;1017               | IL2;IL6;CDK4;AKT1;TP53;STAT1;IFNG;IL4;CCND1;NFKBIA;IL1B;IL1A;GSK3B;RELA;CHUK;CDK2                             | 5.58E-09 | 2.20E-08 | Human Diseases                       |
| path:hsa05134 | Legionellosis                             | 11      | 145       | 55     | 7246     | 0.07586207 | 0.00759039 | 9.994482759      | 3569;841;840;2920;3553;4792;7124;842;836;5970;3576                                          | IL6;CASP8;CASP7;CXCL2;IL1B;NFKBIA;TNF;CASP9;CASP3;RELA;CXCL8                                                  | 7.93E-09 | 3.07E-08 | Human Diseases                       |
| path:hsa04917 | Prolactin signaling pathway               | 12      | 145       | 70     | 7246     | 0.08275862 | 0.0096605  | 8.566699507      | 2100;5894;3659;207;1432;2353;2932;6772;595;5594;2099;5970                                   | ESR2;RAF1;IRF1;AKT1;MAPK14;FOS;GSK3B;STAT1;CCND1;MAPK1;ESR1;RELA                                              | 1.03E-08 | 3.88E-08 | Organismal Systems                   |
| path:hsa04012 | ErbB signaling pathway                    | 13      | 145       | 85     | 7246     | 0.08965517 | 0.01173061 | 7.642839757      | 5894;207;3725;2065;1026;1950;4609;5578;5594;5579;2932;2064;1956                             | RAF1;AKT1;JUN;ERBB3;CDKN1A;EGF;MYC;PRKCA;MAPK1;PRKCB;GSK3B;ERBB2;EGFR                                         | 1.03E-08 | 3.88E-08 | Environmental Information Processing |
| path:hsa04370 | VEGF signaling pathway                    | 11      | 145       | 59     | 7246     | 0.07586207 | 0.00814242 | 9.316890707      | 5894;207;1432;4846;7422;5743;842;5578;5594;5579;3315                                        | RAF1;AKT1;MAPK14;NOS3;VEGFA;PTGS2;CASP9;PRKCA;MAPK1;PRKCB;HSPB1                                               | 1.73E-08 | 6.40E-08 | Environmental Information Processing |
| path:hsa04621 | NOD-like receptor signaling pathway       | 17      | 145       | 167    | 7246     | 0.11724138 | 0.0230472  | 5.087012183      | 6347;598;3569;841;1432;3725;6772;3320;2920;3553;4792;7124;5594;596;5970;1147;3576           | CCL2;BCL2L1;IL6;CASP8;MAPK14;JUN;STAT1;HSP90AA1;CXCL2;IL1B;NFKBIA;TNF;MAPK1;BCL2;RELA;CHUK;CXCL8              | 2.95E-08 | 1.08E-07 | Organismal Systems                   |
| path:hsa05014 | Amyotrophic lateral sclerosis (ALS)       | 10      | 145       | 50     | 7246     | 0.06896552 | 0.00690036 | 9.994482759      | 581;598;1432;7157;6647;7124;842;596;836;847                                                 | BAX;BCL2L1;MAPK14;TP53;SOD1;TNF;CASP9;BCL2;CASP3;CAT                                                          | 3.91E-08 | 1.40E-07 | Human Diseases                       |
| path:hsa05230 | Central carbon metabolism in cancer       | 11      | 145       | 65     | 7246     | 0.07586207 | 0.00897047 | 8.456870027      | 4233;3091;5894;3099;207;7157;4609;5594;5728;2064;1956                                       | MET;HIF1A;RAF1;HK2;AKT1;TP53;MYC;MAPK1;PTEN;ERBB2;EGFR                                                        | 5.00E-08 | 1.77E-07 | Human Diseases                       |
| path:hsa04510 | Focal adhesion                            | 18      | 145       | 199    | 7246     | 0.12413793 | 0.02746343 | 4.520117831      | 4233;5894;6696;207;3725;7422;595;1950;1277;5578;5594;5579;5728;2932;596;2064;1956;857       | MET;RAF1;SPPI;AKT1;JUN;VEGFA;CCND1;EGF;COL1A1;PRKCA;MAPK1;PRKCB;PTEN;GSK3B;BCL2;ERBB2;EGFR;CAV1               | 7.15E-08 | 2.49E-07 | Cellular Processes                   |
| path:hsa04071 | Sphingolipid signaling pathway            | 14      | 145       | 118    | 7246     | 0.09655172 | 0.01628485 | 5.92893045       | 581;5894;207;1432;4846;7157;1509;7124;5578;5594;5579;5728;596;5970                          | BAX;RAF1;AKT1;MAPK14;NOS3;TP53;CSD;TNF;PRKCA;MAPK1;PRKCB;PTEN;BCL2;RELA                                       | 7.71E-08 | 2.65E-07 | Environmental Information Processing |
| path:hsa05132 | Salmonella infection                      | 12      | 145       | 84     | 7246     | 0.08275862 | 0.0115926  | 7.138916256      | 3458;3569;4843;1432;3725;2353;2920;3553;3552;5594;5970;3576                                 | IFNG;IL6;NOS2;MAPK14;JUN;FOS;CXCL2;IL1B;IL1A;MAPK1;RELA;CXCL8                                                 | 8.58E-08 | 2.91E-07 | Human Diseases                       |
| path:hsa04630 | Jak-STAT signaling pathway                | 16      | 145       | 162    | 7246     | 0.11034483 | 0.02235716 | 4.935547041      | 4170;5894;3558;3569;207;598;3458;6772;1026;3565;595;4609;1950;596;3586;1956                 | MCL1;RAF1;IL2;IL6;AKT1;BCL2L1;IFNG;STAT1;CDKN1A;IL4;CCND1;MYC;EGF;BCL2;IL10;EGFR                              | 1.19E-07 | 3.97E-07 | Environmental Information Processing |

| Term_ID       | Term_description                                           | ListHit | ListTotal | PopHit | PopTotal | GeneRatio  | BgRatio    | Enrichment_score | GeneIds                                                                         | GeneSymbols                                                                                   | p-value  | FDR_bh     | Classification_level1                |
|---------------|------------------------------------------------------------|---------|-----------|--------|----------|------------|------------|------------------|---------------------------------------------------------------------------------|-----------------------------------------------------------------------------------------------|----------|------------|--------------------------------------|
| path:hsa04931 | Insulin resistance                                         | 13      | 145       | 107    | 7246     | 0.08965517 | 0.01476677 | 6.07141476       | 3569;207;4846;5770;4792;7124;6517;5579;3643;5728;2932;5970;5465                 | IL6;AKT1;NOS3;PTPN1;NFKBIA;TNF;SLC2A4;PRKCB;INSR;PTEN;GSK3B;RELA;PPARA                        | 1.74E-07 | 5.73E-07   | Human Diseases                       |
| path:hsa04215 | Apoptosis - multiple species                               | 8       | 145       | 33     | 7246     | 0.05517241 | 0.00455424 | 12.11452456      | 581;598;332;840;842;836;596;841                                                 | BAX;BCL2L1;BIRC5;CASP7;CASP9;CASP3;BCL2;CASP8                                                 | 1.93E-07 | 6.27E-07   | Cellular Processes                   |
| path:hsa05203 | Viral carcinogenesis                                       | 17      | 145       | 200    | 7246     | 0.11724138 | 0.02760144 | 4.247655172      | 581;1019;1029;3725;841;4193;1026;7157;595;4792;1111;5594;836;890;5970;1017;5925 | BAX;CDK4;CDKN2A;JUN;CASP8;MDM2;CDKN1A;TP53;CCND1;NFKBIA;CHEK1;MAPK1;CASP3;CCNA2;RELA;CDK2;RB1 | 4.16E-07 | 1.34E-06   | Human Diseases                       |
| path:hsa05216 | Thyroid cancer                                             | 8       | 145       | 37     | 7246     | 0.05517241 | 0.00510627 | 10.80484623      | 581;5468;7157;1026;595;4609;5594;6256                                           | BAX;PPARG;TP53;CDKN1A;CCND1;MYC;MAPK1;RXRA                                                    | 5.01E-07 | 1.59E-06   | Human Diseases                       |
| path:hsa04662 | B cell receptor signaling pathway                          | 10      | 145       | 70     | 7246     | 0.06896552 | 0.0096605  | 7.138916256      | 5894;207;2353;3725;4792;5579;5594;2932;5970;1147                                | RAF1;AKT1;FOS;JUN;NFKBIA;PRKCB;MAPK1;GSK3B;RELA;CHUK                                          | 1.07E-06 | 3.36E-06   | Organismal Systems                   |
| path:hsa04658 | Th1 and Th2 cell differentiation                           | 11      | 145       | 90     | 7246     | 0.07586207 | 0.01242065 | 6.107739464      | 3558;3458;2353;1432;3725;6772;3565;4792;5594;5970;1147                          | IL2;IFNG;FOS;MAPK14;JUN;STAT1;IL4;NFKBIA;MAPK1;RELA;CHUK                                      | 1.51E-06 | 4.68E-06   | Organismal Systems                   |
| path:hsa04726 | Serotonergic synapse                                       | 12      | 145       | 113    | 7246     | 0.08275862 | 0.01559481 | 5.306805005      | 351;3356;5894;5742;5743;5578;5594;240;5579;4129;836;6532                        | APP;HTR2A;RAF1;PTGS1;PTGS2;PRKCA;MAPK1;ALOX5;PRKCB;MAOB;CASP3;SLC6A4                          | 2.28E-06 | 6.96E-06   | Organismal Systems                   |
| path:hsa05168 | Herpes simplex infection                                   | 15      | 145       | 183    | 7246     | 0.10344828 | 0.02525531 | 4.096099491      | 6347;3458;3569;841;2353;3725;6772;7157;3553;4792;7124;836;5970;1147;1017        | CCL2;IFNG;IL6;CASP8;FOS;JUN;STAT1;TP53;IL1B;NFKBIA;TNF;CASP3;RELA;CHUK;CDK2                   | 3.30E-06 | 9.93E-06   | Human Diseases                       |
| path:hsa04062 | Chemokine signaling pathway                                | 15      | 145       | 187    | 7246     | 0.10344828 | 0.02580734 | 4.00848239       | 6347;5894;5294;3627;207;6772;2920;653361;4792;5579;5594;2932;5970;1147;3576     | CCL2;RAF1;PIK3CG;CXCL10;AKT1;STAT1;CXCL2;NCF1;NFKBIA;PRKCB;MAPK1;GSK3B;RELA;CHUK;CXCL8        | 4.31E-06 | 1.28E-05   | Organismal Systems                   |
| path:hsa05221 | Acute myeloid leukemia                                     | 9       | 145       | 66     | 7246     | 0.06206897 | 0.00910847 | 6.814420063      | 5894;207;595;862;4609;4353;5594;5970;1147                                       | RAF1;AKT1;CCND1;RUNX1T1;MYC;MPK1;MAPK1;RELA;CHUK                                              | 5.63E-06 | 1.65E-05   | Human Diseases                       |
| path:hsa05120 | Epithelial cell signaling in Helicobacter pylori infection | 9       | 145       | 68     | 7246     | 0.06206897 | 0.00938449 | 6.613995943      | 4233;1432;3725;4792;836;5970;1147;3576;1956                                     | MET;MAPK14;JUN;NFKBIA;CASP3;RELA;CHUK;CXCL8;EGFR                                              | 7.24E-06 | 2.10E-05   | Human Diseases                       |
| path:hsa05211 | Renal cell carcinoma                                       | 9       | 145       | 69     | 7246     | 0.06206897 | 0.0095225  | 6.51814093       | 4233;3091;5894;207;3725;1026;7422;5594;7040                                     | MET;HIF1A;RAF1;AKT1;JUN;CDKN1A;VEGFA;MAPK1;TGFB1                                              | 8.19E-06 | 2.35E-05   | Human Diseases                       |
| path:hsa04014 | Ras signaling pathway                                      | 16      | 145       | 232    | 7246     | 0.11034483 | 0.03201766 | 3.446373365      | 4233;5894;3481;598;207;7422;1950;5578;3643;5594;11186;5579;5970;1147;1956;5921  | MET;RAF1;IGF2;BCL2L1;AKT1;VEGFA;EGF;PRKCA;INSR;MAPK1;RASSF1;PRKB;RELA;CHUK;EGFR;RASA1         | 1.42E-05 | 4.03E-05   | Environmental Information Processing |
| path:hsa04722 | Neurotrophin signaling pathway                             | 11      | 145       | 119    | 7246     | 0.07586207 | 0.01642285 | 4.619298754      | 581;5894;207;1432;3725;7157;4792;5594;2932;596;5970                             | BAX;RAF1;AKT1;MAPK14;JUN;TP53;NFKBIA;MAPK1;GSK3B;BCL2;RELA                                    | 2.34E-05 | 6.55E-05   | Organismal Systems                   |
| path:hsa05231 | Choline metabolism in cancer                               | 10      | 145       | 99     | 7246     | 0.06896552 | 0.01366271 | 5.047718565      | 3091;5894;207;2353;3725;1950;5578;5594;5579;1956                                | HIF1A;RAF1;AKT1;FOS;JUN;EGF;PRKCA;MAPK1;PRKCB;EGFR                                            | 2.57E-05 | 7.12E-05   | Human Diseases                       |
| path:hsa05204 | Chemical carcinogenesis                                    | 9       | 145       | 80     | 7246     | 0.06206897 | 0.01104057 | 5.621896552      | 2944;1543;1576;1545;6817;1544;2950;5743;6818                                    | GSTM1;CYP1A1;CYP3A4;CYP1B1;SULT1A1;CYP1A2;GSTP1;PTGS2;SULT1A3                                 | 2.78E-05 | 7.62E-05   | Human Diseases                       |
| path:hsa01523 | Antifolate resistance                                      | 6       | 145       | 31     | 7246     | 0.04137931 | 0.00427822 | 9.672080089      | 3569;3553;7124;5970;1147;9429                                                   | IL6;IL1B;TNF;RELA;CHUK;ABCG2                                                                  | 2.82E-05 | 7.65E-05   | Human Diseases                       |
| path:hsa04928 | Parathyroid hormone synthesis, secretion and action        | 10      | 145       | 106    | 7246     | 0.06896552 | 0.01462876 | 4.71437866       | 860;5894;2353;1026;5578;5594;5579;596;1956;6256                                 | RUNX2;RAF1;FOS;CDKN1A;PRKCA;MAPK1;PRKCB;BCL2;EGFR;RXRA                                        | 4.66E-05 | 0.00012501 | Organismal Systems                   |

| Term_ID       | Term_description                             | ListHit | ListTotal | PopHit | PopTotal | GeneRatio  | BgRatio    | Enrichment_score | GeneIds                                                    | GeneSymbols                                                        | p-value    | FDR_bh     | Classification_level1                |
|---------------|----------------------------------------------|---------|-----------|--------|----------|------------|------------|------------------|------------------------------------------------------------|--------------------------------------------------------------------|------------|------------|--------------------------------------|
| path:hsa04921 | Oxytocin signaling pathway                   | 12      | 145       | 152    | 7246     | 0.08275862 | 0.02097709 | 3.945190563      | 5294;5894;2353;4846;3725;1026;595;5743;5578;5594;5579;1956 | PIK3CG;RAF1;FOS;NOS3;JUN;CDKN1A;CCND1;PTGS2;PRKCA;MAPK1;PRKCB;EGFR | 4.82E-05   | 0.00012775 | Organismal Systems                   |
| path:hsa05020 | Prion diseases                               | 6       | 145       | 34     | 7246     | 0.04137931 | 0.00469224 | 8.818661258      | 581;3569;6647;3553;3552;5594                               | BAX;IL6;SOD1;IL1B;IL1A;MAPK1                                       | 4.90E-05   | 0.00012867 | Human Diseases                       |
| path:hsa04664 | Fc epsilon RI signaling pathway              | 8       | 145       | 67     | 7246     | 0.05517241 | 0.00924648 | 5.966855378      | 5894;207;1432;3565;7124;5578;5594;240                      | RAF1;AKT1;MAPK14;IL4;TNF;PRKCA;MAPK1;ALOX5                         | 5.10E-05   | 0.00013234 | Organismal Systems                   |
| path:hsa05330 | Allograft rejection                          | 6       | 145       | 35     | 7246     | 0.04137931 | 0.00483025 | 8.566699507      | 959;3558;3458;3565;7124;3586                               | CD40LG;IL2;IFNG;IL4;TNF;IL10                                       | 5.82E-05   | 0.00014954 | Human Diseases                       |
| path:hsa04920 | Adipocytokine signaling pathway              | 8       | 145       | 69     | 7246     | 0.05517241 | 0.0095225  | 5.793903048      | 207;4792;7124;6517;5970;1147;5465;6256                     | AKT1;NFKBIA;TNF;SLC2A4;RELA;CHUK;PPARA;RXRA                        | 6.32E-05   | 0.00016062 | Organismal Systems                   |
| path:hsa04622 | RIG-I-like receptor signaling pathway        | 8       | 145       | 70     | 7246     | 0.05517241 | 0.0096605  | 5.711133005      | 3627;841;1432;4792;7124;5970;1147;3576                     | CXCL10;CASP8;MAPK14;NFKBIA;TNF;RELA;CHUK;CXCL8                     | 7.02E-05   | 0.00017647 | Organismal Systems                   |
| path:hsa05332 | Graft-versus-host disease                    | 6       | 145       | 37     | 7246     | 0.04137931 | 0.00510627 | 8.103634669      | 3458;3558;3569;3553;7124;3552                              | IFNG;IL2;IL6;IL1B;TNF;IL1A                                         | 8.07E-05   | 0.0002009  | Human Diseases                       |
| path:hsa05416 | Viral myocarditis                            | 7       | 145       | 56     | 7246     | 0.04827586 | 0.0077284  | 6.246551724      | 959;3383;595;842;836;841;857                               | CD40LG;ICAM1;CCND1;CASP9;CASP3;CASP8;CAV1                          | 0.00011352 | 0.00027978 | Human Diseases                       |
| path:hsa04914 | Progesterone-mediated oocyte maturation      | 9       | 145       | 99     | 7246     | 0.06206897 | 0.01366271 | 4.542946708      | 5894;207;1432;3320;5241;5594;890;891;1017                  | RAF1;AKT1;MAPK14;HSP90AA1;PGR;MAPK1;CCNA2;CCNB1;CDK2               | 0.00015036 | 0.00036687 | Organismal Systems                   |
| path:hsa04610 | Complement and coagulation cascades          | 8       | 145       | 79     | 7246     | 0.05517241 | 0.01090257 | 5.060497599      | 2155;2152;5328;7056;2147;2159;5327;5054                    | F7;F3;PLAU;THBD;F2;F10;PLAT;SERPIN E1                              | 0.00016661 | 0.00040251 | Organismal Systems                   |
| path:hsa04934 | Cushing syndrome                             | 11      | 145       | 154    | 7246     | 0.07586207 | 0.02125311 | 3.569458128      | 1019;1029;1026;595;1869;196;5594;2932;1956;1017;5925       | CDK4;CDKN2A;CDKN1A;CCND1;E2F1;AHR;MAPK1;GSK3B;EGFR;CDK2;RB1        | 0.00024468 | 0.00058532 | Human Diseases                       |
| path:hsa04672 | Intestinal immune network for IgA production | 6       | 145       | 46     | 7246     | 0.04137931 | 0.00634833 | 6.51814093       | 959;3558;3569;3565;3586;7040                               | CD40LG;IL2;IL6;IL4;IL10;TGFB1                                      | 0.00028037 | 0.00066419 | Organismal Systems                   |
| path:hsa04540 | Gap junction                                 | 8       | 145       | 88     | 7246     | 0.05517241 | 0.01214463 | 4.542946708      | 3356;5894;1950;2697;5578;5594;5579;1956                    | HTR2A;RAF1;EGF;GJA1;PRKCA;MAPK1;PRKCB;EGFR                         | 0.00035284 | 0.00082783 | Cellular Processes                   |
| path:hsa04211 | Longevity regulating pathway                 | 8       | 145       | 89     | 7246     | 0.05517241 | 0.01228264 | 4.491902363      | 581;6648;5468;207;7157;3643;5970;847                       | BAX;SOD2;PPARG;AKT1;TP53;INSR;RELA;CAT                             | 0.00038123 | 0.00088591 | Organismal Systems                   |
| path:hsa04371 | Apelin signaling pathway                     | 10      | 145       | 137    | 7246     | 0.06896552 | 0.01890698 | 3.647621445      | 5894;5294;4843;6696;207;4846;595;5594;5327;5054            | RAF1;PIK3CG;NOS2;SPP1;AKT1;NOS3;CCND1;MAPK1;PLAT;SERPINE1          | 0.00039595 | 0.00091144 | Environmental Information Processing |
| path:hsa04912 | GnRH signaling pathway                       | 8       | 145       | 93     | 7246     | 0.05517241 | 0.01283467 | 4.298702262      | 5894;1432;4313;3725;5578;5594;5579;1956                    | RAF1;MAPK14;MMP2;JUN;PRKCA;MAPK1;PRKCB;EGFR                        | 0.00051401 | 0.00117215 | Organismal Systems                   |
| path:hsa04150 | mTOR signaling pathway                       | 10      | 145       | 151    | 7246     | 0.06896552 | 0.02083908 | 3.309431377      | 5894;207;7124;5578;5594;3643;5728;2932;5579;1147           | RAF1;AKT1;TNF;PRKCA;MAPK1;INSR;PTEN;GSK3B;PRKCB;CHUK               | 0.00085257 | 0.00192619 | Environmental Information Processing |
| path:hsa00380 | Tryptophan metabolism                        | 5       | 145       | 40     | 7246     | 0.03448276 | 0.00552029 | 6.246551724      | 1543;1545;1544;4129;847                                    | CYP1A1;CYP1B1;CYP1A2;MAOB;CAT                                      | 0.00112093 | 0.00250923 | Metabolism                           |
| path:hsa04940 | Type I diabetes mellitus                     | 5       | 145       | 41     | 7246     | 0.03448276 | 0.00565829 | 6.094196804      | 3458;3558;3553;7124;3552                                   | IFNG;IL2;IL1B;TNF;IL1A                                             | 0.00125632 | 0.00278674 | Human Diseases                       |
| path:hsa04623 | Cytosolic DNA-sensing pathway                | 6       | 145       | 62     | 7246     | 0.04137931 | 0.00855644 | 4.836040044      | 3627;3569;3553;4792;5970;1147                              | CXCL10;IL6;IL1B;NFKBIA;RELA;CHUK                                   | 0.00141571 | 0.00311201 | Organismal Systems                   |
| path:hsa04217 | Necroptosis                                  | 10      | 145       | 162    | 7246     | 0.06896552 | 0.02235716 | 3.084716901      | 581;3458;142;6772;3320;3553;7124;3552;596;841              | BAX;IFNG;PARP1;STAT1;HSP90AA1;IL1B;TNF;IL1A;BCL2;CASP8             | 0.00145946 | 0.00317954 | Cellular Processes                   |
| path:hsa04910 | Insulin signaling pathway                    | 9       | 145       | 137    | 7246     | 0.06206897 | 0.01890698 | 3.2828593        | 5894;3099;207;5770;31;6517;5594;3643;2932                  | RAF1;HK2;AKT1;PTPN1;ACACA;SLC2A4;MAPK1;INSR;GSK3B                  | 0.00163675 | 0.00353422 | Organismal Systems                   |
| path:hsa04725 | Cholinergic synapse                          | 8       | 145       | 112    | 7246     | 0.05517241 | 0.0154568  | 3.569458128      | 5294;43;207;2353;5578;5594;5579;596                        | PIK3CG;ACHE;AKT1;FOS;PRKCA;MAPK1;PRKCB;BCL2                        | 0.00174525 | 0.00370296 | Organismal Systems                   |



| Term_ID       | Term_description                                | ListHit | ListTotal | PopHit | PopTotal | GeneRatio  | BgRatio    | Enrichment_score | GeneIds                                                              | GeneSymbols                                                              | p-value    | FDR_bh     | Classification_level1                |
|---------------|-------------------------------------------------|---------|-----------|--------|----------|------------|------------|------------------|----------------------------------------------------------------------|--------------------------------------------------------------------------|------------|------------|--------------------------------------|
| path:hsa04670 | Leukocyte transendothelial migration            | 8       | 145       | 112    | 7246     | 0.05517241 | 0.0154568  | 3.569458128      | 4318;1432;4313;3383;653361;5578;7412;5579                            | MMP9;MAPK14;MMP2;ICAM1;NCF1;PRKCA;VCAM1;PRKCB                            | 0.00174525 | 0.00370296 | Organismal Systems                   |
| path:hsa05131 | Shigellosis                                     | 6       | 145       | 65     | 7246     | 0.04137931 | 0.00897047 | 4.612838196      | 1432;4792;5594;5970;1147;3576                                        | MAPK14;NFKBIA;MAPK1;RELA;CHUK;CXCL8                                      | 0.0018112  | 0.00377719 | Human Diseases                       |
| path:hsa04137 | Mitophagy - animal                              | 6       | 145       | 65     | 7246     | 0.04137931 | 0.00897047 | 4.612838196      | 3091;598;3725;7157;1869;5970                                         | HIF1A;BCL2L1;JUN;TP53;E2F1;RELA                                          | 0.0018112  | 0.00377719 | Cellular Processes                   |
| path:hsa04060 | Cytokine-cytokine receptor interaction          | 14      | 145       | 292    | 7246     | 0.09655172 | 0.0402981  | 2.395937648      | 6347;959;3627;3569;3558;3458;3565;2920;3553;7124;3552;3586;7040;3576 | CCL2;CD40LG;CXCL10;IL6;IL2;IFNG;IL4;CXCL2;IL1B;TNF;IL1A;IL10;TGFB1;CXCL8 | 0.00204735 | 0.0042335  | Environmental Information Processing |
| path:hsa04930 | Type II diabetes mellitus                       | 5       | 145       | 46     | 7246     | 0.03448276 | 0.00634833 | 5.431784108      | 3099;7124;6517;5594;3643                                             | HK2;TNF;SLC2A4;MAPK1;INSR                                                | 0.00212126 | 0.00434948 | Human Diseases                       |
| path:hsa05310 | Asthma                                          | 4       | 145       | 28     | 7246     | 0.02758621 | 0.0038642  | 7.138916256      | 7124;3586;959;3565                                                   | TNF;IL10;CD40LG;IL4                                                      | 0.00216765 | 0.00440755 | Human Diseases                       |
| path:hsa05031 | Amphetamine addiction                           | 6       | 145       | 68     | 7246     | 0.04137931 | 0.00938449 | 4.409330629      | 2353;3725;6531;5578;5579;4129                                        | FOS;JUN;SLC6A3;PRKCA;PRKCB;MAOB                                          | 0.00228535 | 0.00460847 | Human Diseases                       |
| path:hsa04072 | Phospholipase D signaling pathway               | 9       | 145       | 145    | 7246     | 0.06206897 | 0.02001104 | 3.101736029      | 5294;5894;207;1950;5578;5594;3643;3576;1956                          | PIK3CG;RAF1;AKT1;EGF;PRKCA;MAPK1;INSR;CXCL8;EGFR                         | 0.00241996 | 0.00483991 | Environmental Information Processing |
| path:hsa04015 | Rap1 signaling pathway                          | 11      | 145       | 206    | 7246     | 0.07586207 | 0.02842948 | 2.668429863      | 4233;5894;207;1432;7422;1950;5578;5594;3643;5579;1956                | MET;RAF1;AKT1;MAPK14;VEGFA;EGF;PRKCA;MAPK1;INSR;PRKCB;EGFR               | 0.00271817 | 0.00539215 | Environmental Information Processing |
| path:hsa04913 | Ovarian steroidogenesis                         | 5       | 145       | 49     | 7246     | 0.03448276 | 0.00676235 | 5.099225897      | 1543;1545;5743;240;3643                                              | CYP11A1;CYP11B1;PTGS2;ALOX5;INSR                                         | 0.00281284 | 0.00553493 | Organismal Systems                   |
| path:hsa04520 | Adherens junction                               | 6       | 145       | 72     | 7246     | 0.04137931 | 0.00993652 | 4.164367816      | 4233;5770;5594;3643;2064;1956                                        | MET;PTPN1;MAPK1;INSR;ERBB2;EGFR                                          | 0.00305624 | 0.00591843 | Cellular Processes                   |
| path:hsa00980 | Metabolism of xenobiotics by cytochrome P450    | 6       | 145       | 72     | 7246     | 0.04137931 | 0.00993652 | 4.164367816      | 2944;1543;1576;1545;1544;2950                                        | GSTM1;CYP11A1;CYP3A4;CYP11B1;CYP1A2;GSTP1                                | 0.00305624 | 0.00591843 | Metabolism                           |
| path:hsa04611 | Platelet activation                             | 8       | 145       | 123    | 7246     | 0.05517241 | 0.01697488 | 3.250238295      | 5294;5742;207;1432;4846;1277;5594;1281                               | PIK3CG;PTGS1;AKT1;MAPK14;NOS3;COL1A1;MAPK1;COL3A1                        | 0.00314501 | 0.00604239 | Organismal Systems                   |
| path:hsa00232 | Caffeine metabolism                             | 2       | 145       | 5      | 7246     | 0.0137931  | 0.00069004 | 19.98896552      | 7498;1544                                                            | XDH;CYP1A2                                                               | 0.00382262 | 0.00724188 | Metabolism                           |
| path:hsa04650 | Natural killer cell mediated cytotoxicity       | 8       | 145       | 127    | 7246     | 0.05517241 | 0.01752691 | 3.147868585      | 5894;3458;3383;7124;5578;5594;5579;836                               | RAF1;IFNG;ICAM1;TNF;PRKCA;MAPK1;PRKCB;CASP3                              | 0.0038287  | 0.00724188 | Organismal Systems                   |
| path:hsa04140 | Autophagy - animal                              | 8       | 145       | 128    | 7246     | 0.05517241 | 0.01766492 | 3.123275862      | 3091;5894;598;207;1509;5594;5728;596                                 | HIF1A;RAF1;BCL2L1;AKT1;CTSD;MAPK1;PTEN;BCL2                              | 0.00401635 | 0.00753839 | Cellular Processes                   |
| path:hsa04922 | Regulation of lipolysis in adipocytes           | 5       | 145       | 54     | 7246     | 0.03448276 | 0.00745239 | 4.627075351      | 5742;207;5743;3643;154                                               | PTGS1;AKT1;PTGS2;INSR;ADRB2                                              | 0.00430746 | 0.00802306 | Organismal Systems                   |
| path:hsa04728 | Dopaminergic synapse                            | 8       | 145       | 131    | 7246     | 0.05517241 | 0.01807894 | 3.051750461      | 207;1432;2353;6531;5578;5579;2932;4129                               | AKT1;MAPK14;FOS;SLC6A3;PRKCA;PRKCB;GSK3B;MAOB                            | 0.00462223 | 0.00854413 | Organismal Systems                   |
| path:hsa05010 | Alzheimer disease                               | 9       | 145       | 164    | 7246     | 0.06206897 | 0.02263318 | 2.742388562      | 351;841;840;3553;7124;842;5594;2932;836                              | APP;CASP8;CASP7;IL1B;TNF;CASP9;MAPK1;GSK3B;CASP3                         | 0.0054859  | 0.01006436 | Human Diseases                       |
| path:hsa04960 | Aldosterone-regulated sodium reabsorption       | 4       | 145       | 37     | 7246     | 0.02758621 | 0.00510627 | 5.402423113      | 5594;5578;3643;5579                                                  | MAPK1;PRKCA;INSR;PRKCB                                                   | 0.00608487 | 0.01107991 | Organismal Systems                   |
| path:hsa04213 | Longevity regulating pathway - multiple species | 5       | 145       | 62     | 7246     | 0.03448276 | 0.00855644 | 4.03003337       | 6648;207;6647;3643;847                                               | SOD2;AKT1;SOD1;INSR;CAT                                                  | 0.007761   | 0.01402728 | Organismal Systems                   |
| path:hsa04261 | Adrenergic signaling in cardiomyocytes          | 8       | 145       | 144    | 7246     | 0.05517241 | 0.01987303 | 2.776245211      | 5294;207;1432;6331;5578;5594;154;596                                 | PIK3CG;AKT1;MAPK14;SCN5A;PRKCA;MAPK1;ADRB2;BCL2                          | 0.00809567 | 0.01452459 | Organismal Systems                   |
| path:hsa04666 | Fc gamma R-mediated phagocytosis                | 6       | 145       | 90     | 7246     | 0.04137931 | 0.01242065 | 3.331494253      | 5894;207;653361;5578;5594;5579                                       | RAF1;AKT1;NCF1;PRKCA;MAPK1;PRKCB                                         | 0.00909129 | 0.01619178 | Organismal Systems                   |
| path:hsa04152 | AMPK signaling pathway                          | 7       | 145       | 120    | 7246     | 0.04827586 | 0.01656086 | 2.915057471      | 5468;207;595;31;6517;3643;890                                        | PPARG;AKT1;CCND1;ACACA;SLC2A4;INSR;CCNA2                                 | 0.01008854 | 0.0178377  | Environmental Information Processing |
| path:hsa04020 | Calcium signaling pathway                       | 9       | 145       | 182    | 7246     | 0.06206897 | 0.02511731 | 2.471163319      | 3356;4843;4846;2065;5578;5579;154;2064;1956                          | HTR2A;NOS2;NOS3;ERBB3;PRKCA;PRKCB;ADRB2;ERBB2;EGFR                       | 0.0105908  | 0.01859104 | Environmental Information Processing |

| Term_ID       | Term_description                                 | ListHit | ListTotal | PopHit | PopTotal | GeneRatio  | BgRatio    | Enrichment_score | GeneIds                                    | GeneSymbols                                     | p-value    | FDR_bh     | Classification_level1                |
|---------------|--------------------------------------------------|---------|-----------|--------|----------|------------|------------|------------------|--------------------------------------------|-------------------------------------------------|------------|------------|--------------------------------------|
| path:hsa04973 | Carbohydrate digestion and absorption            | 4       | 145       | 44     | 7246     | 0.02758621 | 0.00607232 | 4.542946708      | 8972;3099;5579;207                         | MGAM;HK2;PRKCB;AKT1                             | 0.01123192 | 0.01957563 | Organismal Systems                   |
| path:hsa00982 | Drug metabolism - cytochrome P450                | 5       | 145       | 68     | 7246     | 0.03448276 | 0.00938449 | 3.674442191      | 2944;1576;1544;2950;4129                   | GSTM1;CYP3A4;CYP1A2;GSTP1;MAOB                  | 0.01136814 | 0.01967253 | Metabolism                           |
| path:hsa04916 | Melanogenesis                                    | 6       | 145       | 101    | 7246     | 0.04137931 | 0.01393872 | 2.968658245      | 5894;5578;5594;5579;2932;7299              | RAF1;PRKCA;MAPK1;PRKCB;GSK3B;TYR                | 0.01549152 | 0.02661923 | Organismal Systems                   |
| path:hsa05030 | Cocaine addiction                                | 4       | 145       | 49     | 7246     | 0.02758621 | 0.00676235 | 4.079380718      | 3725;5970;6531;4129                        | JUN;RELA;SLC6A3;MAOB                            | 0.01623937 | 0.02751671 | Human Diseases                       |
| path:hsa00330 | Arginine and proline metabolism                  | 4       | 145       | 49     | 7246     | 0.02758621 | 0.00676235 | 4.079380718      | 4129;4953;4843;4846                        | MAOB;ODC1;NOS2;NOS3                             | 0.01623937 | 0.02751671 | Metabolism                           |
| path:hsa05320 | Autoimmune thyroid disease                       | 4       | 145       | 50     | 7246     | 0.02758621 | 0.00690036 | 3.997793103      | 3586;3558;959;3565                         | IL10;IL2;CD40LG;IL4                             | 0.01738402 | 0.02925311 | Human Diseases                       |
| path:hsa04024 | cAMP signaling pathway                           | 9       | 145       | 199    | 7246     | 0.06206897 | 0.02746343 | 2.260058915      | 5894;207;2353;3725;4792;5594;154;5970;5465 | RAF1;AKT1;FOS;JUN;NFKBIA;MAPK1;ADRB2;RELA;PPARA | 0.01811682 | 0.03027743 | Environmental Information Processing |
| path:hsa00983 | Drug metabolism - other enzymes                  | 5       | 145       | 77     | 7246     | 0.03448276 | 0.01062655 | 3.244961935      | 2944;7498;1576;2950;4353                   | GSTM1;XDH;CYP3A4;GSTP1;MPO                      | 0.01869269 | 0.03102733 | Metabolism                           |
| path:hsa00052 | Galactose metabolism                             | 3       | 145       | 31     | 7246     | 0.02068966 | 0.00427822 | 4.836040044      | 8972;3099;231                              | MGAM;HK2;AKR1B1                                 | 0.02343149 | 0.03863029 | Metabolism                           |
| path:hsa04146 | Peroxisome                                       | 5       | 145       | 83     | 7246     | 0.03448276 | 0.0114546  | 3.010386373      | 6648;4843;7498;6647;847                    | SOD2;NOS2;XDH;SOD1;CAT                          | 0.02499527 | 0.04093185 | Cellular Processes                   |
| path:hsa04350 | TGF-beta signaling pathway                       | 5       | 145       | 84     | 7246     | 0.03448276 | 0.0115926  | 2.97454844       | 3458;4609;7124;5594;7040                   | IFNG;MYC;TNF;MAPK1;TGFB1                        | 0.02616322 | 0.04255884 | Environmental Information Processing |
| path:hsa04310 | Wnt signaling pathway                            | 7       | 145       | 146    | 7246     | 0.04827586 | 0.02014905 | 2.395937648      | 3725;7157;595;4609;5578;5579;2932          | JUN;TP53;CCND1;MYC;PRKCA;PRKCB;GSK3B            | 0.02686841 | 0.04341651 | Environmental Information Processing |
| path:hsa00140 | Steroid hormone biosynthesis                     | 4       | 145       | 60     | 7246     | 0.02758621 | 0.00828043 | 3.331494253      | 1543;1545;1576;1544                        | CYP1A1;CYP1B1;CYP3A4;CYP1A2                     | 0.03161516 | 0.05041895 | Metabolism                           |
| path:hsa04730 | Long-term depression                             | 4       | 145       | 60     | 7246     | 0.02758621 | 0.00828043 | 3.331494253      | 5578;5894;5594;5579                        | PRKCA;RAF1;MAPK1;PRKCB                          | 0.03161516 | 0.05041895 | Organismal Systems                   |
| path:hsa05016 | Huntington disease                               | 8       | 145       | 187    | 7246     | 0.05517241 | 0.02580734 | 2.137857275      | 581;6648;5468;7157;6647;842;836;841        | BAX;SOD2;PPARG;TP53;SOD1;CASP9;CASP3;CASP8      | 0.03365835 | 0.05332882 | Human Diseases                       |
| path:hsa04390 | Hippo signaling pathway                          | 7       | 145       | 154    | 7246     | 0.04827586 | 0.02125311 | 2.271473354      | 332;595;4609;11186;2932;5054;7040          | BIRC5;CCND1;MYC;RASSF1;GSK3B;SERPINE1;TGFB1     | 0.03453068 | 0.05435798 | Environmental Information Processing |
| path:hsa05217 | Basal cell carcinoma                             | 4       | 145       | 63     | 7246     | 0.02758621 | 0.00869445 | 3.172851669      | 581;1026;7157;2932                         | BAX;CDKN1A;TP53;GSK3B                           | 0.03690441 | 0.05772228 | Human Diseases                       |
| path:hsa04640 | Hematopoietic cell lineage                       | 5       | 145       | 94     | 7246     | 0.03448276 | 0.01297267 | 2.658107117      | 3569;3565;3553;7124;3552                   | IL6;IL4;IL1B;TNF;IL1A                           | 0.03977771 | 0.06182013 | Organismal Systems                   |
| path:hsa04720 | Long-term potentiation                           | 4       | 145       | 67     | 7246     | 0.02758621 | 0.00924648 | 2.983427689      | 5578;5894;5594;5579                        | PRKCA;RAF1;MAPK1;PRKCB                          | 0.04470393 | 0.0686732  | Organismal Systems                   |
| path:hsa04022 | cGMP-PKG signaling pathway                       | 7       | 145       | 163    | 7246     | 0.04827586 | 0.02249517 | 2.14605458       | 5294;5894;207;4846;5594;3643;154           | PIK3CG;RAF1;AKT1;NOS3;MAPK1;INSR;ADRB2          | 0.04475016 | 0.0686732  | Environmental Information Processing |
| path:hsa04750 | Inflammatory mediator regulation of TRP channels | 5       | 145       | 99     | 7246     | 0.03448276 | 0.01366271 | 2.523859282      | 3356;1432;3553;5578;5579                   | HTR2A;MAPK14;IL1B;PRKCA;PRKCB                   | 0.04794368 | 0.07311411 | Organismal Systems                   |
