# Supplementary material for: Identifying the Mechanism of Polygoni Cuspidati Rhizoma et Radix in Treating Acute Liver Failure Based on Network Pharmacology and Molecular Docking
Source: Hindawi journal article supplement (doi:10.1155/2022/2021066), 2022-04-08
Supplement: f1 [file 2021066.f1.zip]

Supplementary file

Table S2. 2013 ALF-related target genes

| No. | Gene           | No. | Gene     | No. | Gene         | No. | Gene     | No. | Gene     | No. | Gene    | No. | Gene     |
|-----|----------------|-----|----------|-----|--------------|-----|----------|-----|----------|-----|---------|-----|----------|
| 1   | TP53           | 56  | BRCA2    | 111 | ABCB1        | 166 | FASLG    | 221 | IL17A    | 276 | MME     | 331 | NFKB1    |
| 2   | TERT           | 57  | TMEM67   | 112 | FAS          | 167 | SH3GL1   | 222 | CP       | 277 | FAH     | 332 | MIR22    |
| 3   | JAK2           | 58  | NSD1     | 113 | NPPA         | 168 | ERCC6    | 223 | FOS      | 278 | FANCM   | 333 | CD46     |
| 4   | RTEL1          | 59  | CBFB     | 114 | LARS1        | 169 | ATM      | 224 | XIAP     | 279 | MKS1    | 334 | CCL5     |
| 5   | FLT3           | 60  | NPPB     | 115 | EGF          | 170 | APC      | 225 | TSC2     | 280 | IL3     | 335 | MET      |
| 6   | TTN            | 61  | DDX41    | 116 | HNF4A        | 171 | ATP7B    | 226 | CSF2     | 281 | NOS2    | 336 | NOBOX    |
| 7   | IL6            | 62  | PIK3CA   | 117 | SERPINA1     | 172 | HADHB    | 227 | TLR2     | 282 | CST3    | 337 | SRP72    |
| 8   | RTEL1-TNFRSF6B | 63  | MIR122   | 118 | BAX          | 173 | POLG2    | 228 | FMR1     | 283 | U2AF1   | 338 | NPHP1    |
| 9   | LIPC           | 64  | MYC      | 119 | MPO          | 174 | MIR320A  | 229 | IL2RA    | 284 | MT-ND1  | 339 | GAREM2   |
| 10  | TNF            | 65  | HADHA    | 120 | MEFV         | 175 | HLA-DQB1 | 230 | APOB     | 285 | SETD2   | 340 | SST      |
| 11  | CEBPA          | 66  | PTEN     | 121 | GNB1         | 176 | MAT1A    | 231 | ADIPOQ   | 286 | BCL2    | 341 | FBN1     |
| 12  | RUNX1          | 67  | CC2D2A   | 122 | IFNL3        | 177 | MPL      | 232 | PLAT     | 287 | PTGS2   | 342 | CALR     |
| 13  | NPM1           | 68  | CDKN2A   | 123 | CHEK2        | 178 | ABCB11   | 233 | VWF      | 288 | JUN     | 343 | RPL5     |
| 14  | TRMU           | 69  | IDH1     | 124 | MMP9         | 179 | SLC25A13 | 234 | CD34     | 289 | SMPD1   | 344 | HIF1A    |
| 15  | IFNG           | 70  | PARN     | 125 | MIR210       | 180 | MAPK1    | 235 | IFIH1    | 290 | BCS1L   | 345 | MAPK8    |
| 16  | KRAS           | 71  | PAX5     | 126 | MIR203A      | 181 | IFNA2    | 236 | MIR152   | 291 | PIK3C2A | 346 | LDLR     |
| 17  | ALB            | 72  | SLC17A5  | 127 | F3           | 182 | LPL      | 237 | NR1H4    | 292 | RYR1    | 347 | HLA-DQA1 |
| 18  | RANBP2         | 73  | PKD1     | 128 | PTPRC        | 183 | CFTR     | 238 | MIRLET7C | 293 | SF3B1   | 348 | ASS1     |
| 19  | IL10           | 74  | PML      | 129 | RBCK1        | 184 | CFH      | 239 | HBB      | 294 | SOD1    | 349 | CD79A    |
| 20  | INSL6          | 75  | IKZF1    | 130 | THPO         | 185 | CXCL10   | 240 | TSC1     | 295 | CCND1   | 350 | MIR16-1  |
| 21  | STAT3          | 76  | TERC     | 131 | HLA-C        | 186 | HAVCR2   | 241 | MYH11    | 296 | COL4A5  | 351 | ADRB2    |
| 22  | KIT            | 77  | FOXP3    | 132 | PTPN11       | 187 | LCN2     | 242 | GALT     | 297 | CYP2D6  | 352 | MILR1    |
| 23  | HMBS           | 78  | ERCC6L2  | 133 | NOS3         | 188 | TF       | 243 | NRAS     | 298 | CHAT    | 353 | RUNX1T1  |
| 24  | ETV6           | 79  | SP140    | 134 | STAT1        | 189 | MIR15A   | 244 | PBX1     | 299 | PMS2    | 354 | MT-CYB   |
| 25  | RINT1          | 80  | POLG     | 135 | CCL2         | 190 | CEP290   | 245 | TCF3     | 300 | TINF2   | 355 | FOXL2    |
| 26  | F2             | 81  | IDH2     | 136 | IL18         | 191 | SERPINE1 | 246 | MDM2     | 301 | CXCL12  | 356 | IL6R     |
| 27  | GPT            | 82  | VEGFA    | 137 | LOC110806263 | 192 | HGF      | 247 | LEP      | 302 | IL1A    | 357 | MIR18A   |
| 28  | ACE            | 83  | ACTB     | 138 | CTLA4        | 193 | AKT1     | 248 | KRT8     | 303 | MYH7    | 358 | EP300    |
| 29  | NPHP3          | 84  | HLA-B    | 139 | HP           | 194 | HNF1B    | 249 | GSTM1    | 304 | WDR19   | 359 | HADH     |
| 30  | KMT2A          | 85  | THBD     | 140 | IL2          | 195 | EGFR     | 250 | MIR27A   | 305 | PDGFRA  | 360 | CYP2E1   |
| 31  | CRP            | 86  | CTNNB1   | 141 | PPARG        | 196 | SMAD4    | 251 | FGFR1    | 306 | CSF3R   | 361 | TNFRSF1A |
| 32  | HFE            | 87  | APOE     | 142 | CASP8        | 197 | AGTR1    | 252 | TIMP1    | 307 | HJV     | 362 | MAP2K1   |
| 33  | CPT2           | 88  | PKHD1    | 143 | PKD2         | 198 | SCARB2   | 253 | PRKAR1A  | 308 | CD81    | 363 | CPT1A    |
| 34  | NBAS           | 89  | HNF1A    | 144 | BCR          | 199 | MBL2     | 254 | MYB      | 309 | EIF2AK3 | 364 | MT-ND4   |
| 35  | GBE1           | 90  | F5       | 145 | MIR204       | 200 | SBDS     | 255 | CDKN1A   | 310 | MT-ATP6 | 365 | NR5A2    |
| 36  | LMNA           | 91  | CCR5     | 146 | FADD         | 201 | CASP3    | 256 | PMM2     | 311 | NUP98   | 366 | SEPTIN9  |
| 37  | DNAJC21        | 92  | RARA     | 147 | SERPINC1     | 202 | IGF1     | 257 | UROD     | 312 | MTM1    | 367 | MIRLET7D |
| 38  | DNMT3A         | 93  | INPP5E   | 148 | IL18BP       | 203 | KRT18    | 258 | CCR6     | 313 | ANXA5   | 368 | NOTCH2   |
| 39  | GATA2          | 94  | MIR21    | 149 | NEK8         | 204 | CD4      | 259 | SERPINA3 | 314 | PPOX    | 369 | GAA      |
| 40  | NBN            | 95  | TLR4     | 150 | HAVCR1       | 205 | C3       | 260 | MIR221   | 315 | MMP2    | 370 | ITGB3    |
| 41  | MIR155         | 96  | AFP      | 151 | ALDH2        | 206 | MIR34A   | 261 | TNNT2    | 316 | VHL     | 371 | CDKN2B   |
| 42  | HLA-DRB1       | 97  | RPGRIP1L | 152 | MIR17        | 207 | GGT1     | 262 | JAK3     | 317 | FECH    | 372 | GATA4    |
| 43  | IL1B           | 98  | REN      | 153 | CRLF2        | 208 | CPOX     | 263 | MPV17    | 318 | JAG1    | 373 | MMP1     |
| 44  | INS            | 99  | TLR3     | 154 | ELANE        | 209 | POF1B    | 264 | TGM6     | 319 | SURF1   | 374 | SFTPC    |
| 45  | SP110          | 100 | WT1      | 155 | JAK1         | 210 | ICAM1    | 265 | CFI      | 320 | IGF2R   | 375 | G6PD     |
| 46  | TET2           | 101 | STAT5B   | 156 | LPP          | 211 | CD40LG   | 266 | FN1      | 321 | B2M     | 376 | DGKE     |
| 47  | NUP214         | 102 | STAR     | 157 | ZBTB16       | 212 | GATA3    | 267 | TICAM1   | 322 | BRCA1   | 377 | CDKN3    |
| 48  | ABL1           | 103 | LPIN1    | 158 | CREBBP       | 213 | MECOM    | 268 | APOA1    | 323 | MTOR    | 378 | DYNC2H1  |
| 49  | MIR126         | 104 | IRF3     | 159 | NOTCH1       | 214 | CAV1     | 269 | SCYL1    | 324 | ASXL1   | 379 | MIR23A   |
| 50  | CXCL8          | 105 | IL4      | 160 | TBK1         | 215 | CYP3A4   | 270 | AGT      | 325 | IL7R    | 380 | BRAF     |
| 51  | GATA1          | 106 | MTHFR    | 161 | TAL1         | 216 | ABCB4    | 271 | IGHMBP2  | 326 | MIR222  | 381 | ANPEP    |
| 52  | ALAD           | 107 | TTR      | 162 | EDN1         | 217 | ENG      | 272 | FIP1L1   | 327 | EIF2AK2 | 382 | CYCS     |
| 53  | TGFB1          | 108 | CSF3     | 163 | HRAS         | 218 | HMOX1    | 273 | PRF1     | 328 | ADA     | 383 | FLT1     |
| 54  | IFNA1          | 109 | EPO      | 164 | HAMP         | 219 | MT-CO3   | 274 | ADAMTS13 | 329 | FANCA   | 384 | CLCN6    |
| 55  | MIR223         | 110 | HLA-A    | 165 | IL1RN        | 220 | MIR146A  | 275 | DDX3X    | 330 | MIR29A  | 385 | SLC22A12 |

Table S2. 2913 ALF-related target genes (continued)

| No. | Gene     | No. | Gene         | No. | Gene     | No. | Gene    | No. | Gene         | No. | Gene      | No. | Gene         |
|-----|----------|-----|--------------|-----|----------|-----|---------|-----|--------------|-----|-----------|-----|--------------|
| 386 | GBA      | 441 | SCARB1       | 496 | LIPA     | 551 | SCN5A   | 606 | IRF7         | 661 | POLR1C    | 716 | PTHLH        |
| 387 | SLC22A5  | 442 | MIR20A       | 497 | STAT5A   | 552 | NFKBIA  | 607 | CCL11        | 662 | NOTCH3    | 717 | PCK1         |
| 388 | INSR     | 443 | ABCC2        | 498 | CYP3A5   | 553 | CDH1    | 608 | HSD3B7       | 663 | RPS19     | 718 | PECAM1       |
| 389 | SLC10A1  | 444 | TFRC         | 499 | IRF2BP2  | 554 | TNFSF10 | 609 | TCIRG1       | 664 | NDUFS4    | 719 | ADH5         |
| 390 | SARS2    | 445 | MYH6         | 500 | AXIN1    | 555 | AGXT    | 610 | MYD88        | 665 | AHI1      | 720 | STAT2        |
| 391 | IFT140   | 446 | NCAM1        | 501 | RPS26    | 556 | TSPO    | 611 | TEK          | 666 | ABCD1     | 721 | ALAS2        |
| 392 | ESR1     | 447 | ERCC1        | 502 | SRC      | 557 | MAPK14  | 612 | MIR199A1     | 667 | MST1      | 722 | CYP19A1      |
| 393 | IFNB1    | 448 | MIR23B       | 503 | LGALS3   | 558 | MVK     | 613 | NLRP3        | 668 | TGFB3     | 723 | EFL1         |
| 394 | MIR127   | 449 | MIR106B      | 504 | DNAH8    | 559 | HOTAIR  | 614 | LOC107303340 | 669 | PTCH1     | 724 | CXCR3        |
| 395 | CYP1A1   | 450 | MX1          | 505 | OTC      | 560 | FGA     | 615 | MMACHC       | 670 | HLA-DPB1  | 725 | CYP7A1       |
| 396 | GSTP1    | 451 | ABCC8        | 506 | CD14     | 561 | MT-ND2  | 616 | LRRC56       | 671 | SMAD3     | 726 | PRL          |
| 397 | BTK      | 452 | NR1H2        | 507 | SLC25A15 | 562 | ERBB3   | 617 | SDHA         | 672 | CBS       | 727 | PRTN3        |
| 398 | MIR181A1 | 453 | TJP2         | 508 | VCAM1    | 563 | ERCC2   | 618 | ACADVL       | 673 | COL4A3    | 728 | CCL3         |
| 399 | DMD      | 454 | PTH1R        | 509 | IL13     | 564 | TCF4    | 619 | SLC2A2       | 674 | LMBRD1    | 729 | SKIV2L       |
| 400 | MT-TL1   | 455 | LOC110806306 | 510 | LEPR     | 565 | CDKN1C  | 620 | PARGC1A      | 675 | BMP2      | 730 | SPINK1       |
| 401 | IKBKG    | 456 | CLCN5        | 511 | CBL      | 566 | RETN    | 621 | NOD2         | 676 | LOX       | 731 | SYK          |
| 402 | ACAD9    | 457 | PTX3         | 512 | TMEM216  | 567 | SET     | 622 | CDK1         | 677 | AVP       | 732 | ACTC1        |
| 403 | MIR181A2 | 458 | DSP          | 513 | MIR25    | 568 | ACADM   | 623 | TTC21B       | 678 | ERCC4     | 733 | GAPDH        |
| 404 | CD19     | 459 | FANCC        | 514 | POMC     | 569 | MRTFA   | 624 | NKX2-5       | 679 | MMP3      | 734 | IL12A        |
| 405 | DDX58    | 460 | NABP1        | 515 | PON1     | 570 | IFNAR2  | 625 | IL15         | 680 | CACNA1S   | 735 | CDKN2B-AS1   |
| 406 | ABCC1    | 461 | ALMS1        | 516 | BDNF     | 571 | MUC1    | 626 | LIG4         | 681 | BAAT      | 736 | HLA-G        |
| 407 | BCOR     | 462 | MT-ND6       | 517 | NFE2L2   | 572 | FABP1   | 627 | IL2RB        | 682 | EDNRB     | 737 | SQSTM1       |
| 408 | TRAF3    | 463 | ELN          | 518 | CD40     | 573 | MT-CO1  | 628 | CFHR1        | 683 | NQO1      | 738 | MSH2         |
| 409 | TPMT     | 464 | ITGAM        | 519 | IL1R1    | 574 | DES     | 629 | ACADS        | 684 | HMGCR     | 739 | TMEM237      |
| 410 | CCN2     | 465 | ABCG2        | 520 | IFT172   | 575 | BIRC5   | 630 | MAVS         | 685 | DNMT3B    | 740 | FCGR2A       |
| 411 | SAMD9L   | 466 | NPC1         | 521 | SAA1     | 576 | NF1     | 631 | MCL1         | 686 | CIITA     | 741 | ERBB2        |
| 412 | PLG      | 467 | KDR          | 522 | NR3C2    | 577 | TRB     | 632 | CYP1A2       | 687 | EDN3      | 742 | MYSM1        |
| 413 | RSF1     | 468 | INVS         | 523 | RAD51    | 578 | COL4A4  | 633 | GLIS2        | 688 | XRCC4     | 743 | GCK          |
| 414 | ADM      | 469 | CREB1        | 524 | CXCR4    | 579 | GLA     | 634 | PRKCD        | 689 | BCL10     | 744 | MEG3         |
| 415 | SPP1     | 470 | ACVRL1       | 525 | TFR2     | 580 | EZH2    | 635 | PNPLA3       | 690 | NPHP3-AS1 | 745 | IL6ST        |
| 416 | PPARA    | 471 | OCN          | 526 | RBP4     | 581 | MIR181C | 636 | CD274        | 691 | KCNJ11    | 746 | AQP2         |
| 417 | BCL2L1   | 472 | XRCC2        | 527 | SELE     | 582 | ENPP1   | 637 | AIRE         | 692 | MIR93     | 747 | LPA          |
| 418 | MTTP     | 473 | RAF1         | 528 | HMGB1    | 583 | LBP     | 638 | GRB2         | 693 | LCK       | 748 | SCN1A        |
| 419 | CALCA    | 474 | FANCI        | 529 | PEX6     | 584 | PMP22   | 639 | CD28         | 694 | OFD1      | 749 | GHR          |
| 420 | MB       | 475 | ATP8B1       | 530 | BMP15    | 585 | ADCY10  | 640 | CSF1         | 695 | CYP2B6    | 750 | B9D1         |
| 421 | KITLG    | 476 | CYP11A1      | 531 | RET      | 586 | NPHP4   | 641 | SIRT1        | 696 | ZCCHC8    | 751 | SOD2         |
| 422 | SELP     | 477 | HFE-AS1      | 532 | IGF2     | 587 | CD8A    | 642 | GLUL         | 697 | EDAR      | 752 | UNC93B1      |
| 423 | BSCL2    | 478 | AGPAT2       | 533 | MIF      | 588 | CHUK    | 643 | SYCE1        | 698 | APRT      | 753 | IGF1R        |
| 424 | SEPSECS  | 479 | MT-ND3       | 534 | CASR     | 589 | ACE2    | 644 | SLCO1B1      | 699 | ALG9      | 754 | IL12RB1      |
| 425 | CFB      | 480 | CDKN1B       | 535 | AKR1D1   | 590 | TFAM    | 645 | DNMT1        | 700 | IKBKB     | 755 | CAVIN1       |
| 426 | MIR19A   | 481 | NR3C1        | 536 | ADRB1    | 591 | TMEM231 | 646 | SRSF2        | 701 | SRP54     | 756 | CETP         |
| 427 | ABCA3    | 482 | DZIP1L       | 537 | ASGR1    | 592 | CYP2C9  | 647 | TGFBR1       | 702 | UGT1A1    | 757 | AARS2        |
| 428 | MT-ND5   | 483 | ITGA2B       | 538 | CD44     | 593 | PTPN22  | 648 | NDUFAF2      | 703 | G6PC1     | 758 | RPS14        |
| 429 | BMP6     | 484 | DGUOK        | 539 | SLC40A1  | 594 | RUNX2   | 649 | SOCS3        | 704 | NDUFS2    | 759 | TLR9         |
| 430 | LTA      | 485 | CLDN1        | 540 | RB1      | 595 | MIR125A | 650 | TWINK        | 705 | GDF9      | 760 | ATRX         |
| 431 | VDR      | 486 | IL5          | 541 | RARB     | 596 | MIR143  | 651 | IFT122       | 706 | APOC2     | 761 | TGFBR2       |
| 432 | LAMTOR5  | 487 | KNG1         | 542 | CLEC4M   | 597 | KRT19   | 652 | CDK4         | 707 | CXCR1     | 762 | ALOX5        |
| 433 | DKC1     | 488 | MAPK3        | 543 | MIR196A2 | 598 | GH1     | 653 | WDR35        | 708 | TCTN2     | 763 | CDK2         |
| 434 | FGF2     | 489 | H2AC18       | 544 | IL7      | 599 | CAT     | 654 | IQCB1        | 709 | ADAR      | 764 | SFTPA2       |
| 435 | CD33     | 490 | SOHLH1       | 545 | MIR181B1 | 600 | MSH5    | 655 | STIL         | 710 | PCSK9     | 765 | ADORA2A      |
| 436 | UMOD     | 491 | CYP2C19      | 546 | CD36     | 601 | PLAUR   | 656 | HPRT1        | 711 | SON       | 766 | LOC101928371 |
| 437 | XDH      | 492 | SLC2A9       | 547 | PARP1    | 602 | GC      | 657 | WRAP53       | 712 | ANKRD26   | 767 | GANAB        |
| 438 | ASGR2    | 493 | SOCS1        | 548 | IFNL4    | 603 | CASP9   | 658 | ACTA1        | 713 | CEP19     | 768 | STK11        |
| 439 | MIR195   | 494 | RAG1         | 549 | CEBPB    | 604 | CFHR5   | 659 | GNAS         | 714 | BGLAP     | 769 | IFNGR1       |
| 440 | PDCD1    | 495 | SLC4A1       | 550 | ANGPT2   | 605 | GDNF    | 660 | IGFBP3       | 715 | NAGLU     | 770 | GLIS3        |

Table S2. 2913 ALF-related target genes (continued)

| No. | Gene     | No. | Gene      | No. | Gene      | No. | Gene      | No.  | Gene     | No.  | Gene     | No.  | Gene           |
|-----|----------|-----|-----------|-----|-----------|-----|-----------|------|----------|------|----------|------|----------------|
| 771 | MIR499A  | 826 | SFTPD     | 881 | RXRA      | 936 | HDAC9     | 991  | RPS24    | 1046 | CTSB     | 1101 | VIPAS39        |
| 772 | GFI1     | 827 | HSPA4     | 882 | CD247     | 937 | ECE1      | 992  | NR112    | 1047 | TRPV4    | 1102 | MDM4           |
| 773 | SLC6A4   | 828 | MIR199B   | 883 | ERCC8     | 938 | ABCC3     | 993  | SCO2     | 1048 | CXCR2    | 1103 | CASP7          |
| 774 | LEF1     | 829 | CYC1      | 884 | TYK2      | 939 | DPAGT1    | 994  | LIF      | 1049 | TGM1     | 1104 | FHIT           |
| 775 | RUNX3    | 830 | ARG1      | 885 | RRM2B     | 940 | PEX1      | 995  | ALAS1    | 1050 | FANCL    | 1105 | PIK3C2G        |
| 776 | SH2D1A   | 831 | HDAC1     | 886 | MIR378A   | 941 | FKRP      | 996  | MLLT1    | 1051 | COX5A    | 1106 | HNRNPUL2-BSCL2 |
| 777 | B9D2     | 832 | FANCG     | 887 | CD86      | 942 | PAH       | 997  | CLDN6    | 1052 | NPHS2    | 1107 | PSMB9          |
| 778 | GSTT1    | 833 | NDUFV1    | 888 | GYPA      | 943 | FLNC      | 998  | ANGPT1   | 1053 | IL11     | 1108 | SLC7A7         |
| 779 | TTC37    | 834 | COQ2      | 889 | NPY       | 944 | MIR9-1    | 999  | IRF8     | 1054 | SREBF1   | 1109 | NDUFAF6        |
| 780 | SELL     | 835 | SDCCAG8   | 890 | MCCC1     | 945 | AR        | 1000 | LRP5     | 1055 | CD38     | 1110 | SMC3           |
| 781 | VCL      | 836 | SLPI      | 891 | ABCC6     | 946 | F8        | 1001 | MIR140   | 1056 | IFT43    | 1111 | TUG1           |
| 782 | MARS1    | 837 | TNFRSF1E  | 892 | CCNA2     | 947 | SFTPA1    | 1002 | FOXO1    | 1057 | LYN      | 1112 | RPS7           |
| 783 | SLC2A1   | 838 | AMACR     | 893 | TIMP2     | 948 | HSP90AA1  | 1003 | CYP7B1   | 1058 | AGK      | 1113 | SUZ12          |
| 784 | FABP3    | 839 | ABCB7     | 894 | DIPK1A    | 949 | BLM       | 1004 | GSR      | 1059 | MMP8     | 1114 | RPS17          |
| 785 | AIP      | 840 | XRCC1     | 895 | BAG3      | 950 | PNLIP     | 1005 | NPHS1    | 1060 | TREX1    | 1115 | TRA            |
| 786 | CYP17A1  | 841 | DIAPH2    | 896 | BMPR2     | 951 | CHPT1     | 1006 | PDE5A    | 1061 | CHIT1    | 1116 | SLCO1B3        |
| 787 | ALPP     | 842 | TNFRSF13I | 897 | AVPR2     | 952 | MIR224    | 1007 | SELENON  | 1062 | MIR324   | 1117 | FARSB          |
| 788 | PRSS1    | 843 | CFHR3     | 898 | DLD       | 953 | LDHA      | 1008 | TK2      | 1063 | ALK      | 1118 | IL21           |
| 789 | NHP2     | 844 | UROS      | 899 | TSFM      | 954 | F7        | 1009 | ACOX1    | 1064 | IGFBP2   | 1119 | NTRK1          |
| 790 | PIK3CG   | 845 | CCDC85B   | 900 | CSF1R     | 955 | NDUFS7    | 1010 | MEIS1    | 1065 | MIR125B1 | 1120 | TG             |
| 791 | TCTN3    | 846 | RPL11     | 901 | TNFRSF8   | 956 | NDUFA13   | 1011 | GLI1     | 1066 | GFER     | 1121 | IL3RA          |
| 792 | TGFB2    | 847 | IRF5      | 902 | C4A       | 957 | PLAU      | 1012 | TNFAIP3  | 1067 | BSG      | 1122 | AHCY           |
| 793 | PSAP     | 848 | CHGA      | 903 | GPR35     | 958 | MIR150    | 1013 | KRT7     | 1068 | IL4R     | 1123 | HSPD1          |
| 794 | MYBPC3   | 849 | PTGS1     | 904 | SCO1      | 959 | PMFBP1    | 1014 | SMN1     | 1069 | TGIF1    | 1124 | CPD            |
| 795 | PROM1    | 850 | NAGS      | 905 | TGFA      | 960 | GFAP      | 1015 | AKT2     | 1070 | ITCH     | 1125 | MIR34C         |
| 796 | HMGCL    | 851 | MT-TK     | 906 | JC1071335 | 961 | LBR       | 1016 | PNPLA2   | 1071 | PTPA     | 1126 | DDX3Y          |
| 797 | CYP11B2  | 852 | PIK3R1    | 907 | NOS1      | 962 | PALB2     | 1017 | TPO      | 1072 | GUSB     | 1127 | NEAT1          |
| 798 | IL10RB   | 853 | MIR191    | 908 | ITGAL     | 963 | FLNA      | 1018 | GDF15    | 1073 | FANCF    | 1128 | KCNQ1          |
| 799 | NPPC     | 854 | GHRL      | 909 | MPI       | 964 | RBM15     | 1019 | SERPINF2 | 1074 | ICOSLG   | 1129 | BRIP1          |
| 800 | PF4      | 855 | EDNRA     | 910 | RPS6KB1   | 965 | CASP1     | 1020 | RAG2     | 1075 | MIRLET7E | 1130 | PLA2G6         |
| 801 | MECP2    | 856 | ACHE      | 911 | HOXA9     | 966 | COL1A1    | 1021 | BCL2L11  | 1076 | KMT2D    | 1131 | IL22           |
| 802 | RLBP1    | 857 | BCL6      | 912 | C4B       | 967 | PPIG      | 1022 | CTCF     | 1077 | DPP4     | 1132 | ZAP70          |
| 803 | KDM4C    | 858 | TYMP      | 913 | TLR5      | 968 | HLA-DPA1  | 1023 | IGH      | 1078 | ABCD3    | 1133 | BBS1           |
| 804 | GLS      | 859 | MIR200B   | 914 | S100B     | 969 | AURKC     | 1024 | THY1     | 1079 | PEX13    | 1134 | AHSG           |
| 805 | SMARCA4  | 860 | FOXP1     | 915 | PI4KA     | 970 | CD7       | 1025 | IFI27    | 1080 | NKX2-1   | 1135 | POU5F1         |
| 806 | TYMS     | 861 | KLRK1     | 916 | SPI1      | 971 | TNFRSF10I | 1026 | PVT1     | 1081 | PIGA     | 1136 | SLC19A1        |
| 807 | APOBEC3G | 862 | CASP10    | 917 | AGER      | 972 | KL        | 1027 | MBP      | 1082 | H19      | 1137 | APBB1          |
| 808 | NOP10    | 863 | TNFRSF11I | 918 | MIR130A   | 973 | VPS33B    | 1028 | RSAD2    | 1083 | MIR30D   | 1138 | HSPG2          |
| 809 | RYR2     | 864 | MALAT1    | 919 | HSPA1A    | 974 | MTR       | 1029 | RELA     | 1084 | GALE     | 1139 | TAC1           |
| 810 | APOH     | 865 | IFNAR1    | 920 | FOXO3     | 975 | EPOR      | 1030 | MIR483   | 1085 | CD163    | 1140 | CCL4           |
| 811 | MVP      | 866 | HAX1      | 921 | IRS1      | 976 | ADA2      | 1031 | ALDOB    | 1086 | CLCNKB   | 1141 | HSPA5          |
| 812 | FOXRED1  | 867 | JC1066279 | 922 | DHFR      | 977 | IGFBP1    | 1032 | CXCL9    | 1087 | MYH9     | 1142 | FCGR3A         |
| 813 | CD209    | 868 | TLR7      | 923 | GZMB      | 978 | SDHB      | 1033 | MLXIPL   | 1088 | AXL      | 1143 | MIR124-1       |
| 814 | KIR3DL1  | 869 | LCAT      | 924 | HPX       | 979 | PYGM      | 1034 | NR1I3    | 1089 | ISG15    | 1144 | HMGA2          |
| 815 | DNAJC19  | 870 | FGF23     | 925 | LMO2      | 980 | DCK       | 1035 | MT-TE    | 1090 | EPHX1    | 1145 | DBH            |
| 816 | FBXW7    | 871 | PSMB8     | 926 | ANKS6     | 981 | PHKG2     | 1036 | THBS1    | 1091 | CLDN9    | 1146 | BLNK           |
| 817 | DEK      | 872 | DNAJB11   | 927 | PSMA7     | 982 | MYCN      | 1037 | TANGO2   | 1092 | FANCD2   | 1147 | SDHD           |
| 818 | MIR142   | 873 | PDGFRB    | 928 | JC1060990 | 983 | GCG       | 1038 | PEX5     | 1093 | IL12B    | 1148 | NR0B1          |
| 819 | RNASE3   | 874 | ITGB1     | 929 | FH        | 984 | SCGB1A1   | 1039 | MRPS7    | 1094 | PLK1     | 1149 | PTMA           |
| 820 | PRDM16   | 875 | CD80      | 930 | SHH       | 985 | TRIP4     | 1040 | CCK      | 1095 | LAMP2    | 1150 | CXCL1          |
| 821 | SLC25A20 | 876 | IRF1      | 931 | JC1100063 | 986 | TNFSF11   | 1041 | CORIN    | 1096 | GATA6    | 1151 | ABCC4          |
| 822 | VIM      | 877 | TOP1      | 932 | SH2B3     | 987 | CD55      | 1042 | PTH      | 1097 | SLC37A4  | 1152 | SLC34A1        |
| 823 | APOC3    | 878 | CDK6      | 933 | TAFAZZIN  | 988 | ANXA2     | 1043 | SMAD2    | 1098 | MIR30A   | 1153 | C5             |
| 824 | SUN5     | 879 | CSF2RA    | 934 | STAT4     | 989 | TCL1A     | 1044 | GJA1     | 1099 | PRODH    | 1154 | PRAME          |
| 825 | ETFDH    | 880 | MIR24-2   | 935 | CSPP1     | 990 | MUC5B     | 1045 | MEN1     | 1100 | MT-TW    | 1155 | SLC9A3         |

Table S2. 2913 ALF-related target genes (continued)

| No.  | Gene         | No.  | Gene    | No.  | Gene      |
|------|----------|------|----------|------|----------|------|----------|------|--------------|------|---------|------|-----------|
| 1156 | ITGB2    | 1211 | ASL      | 1266 | GSN      | 1321 | KIR2DL3  | 1376 | CCL17        | 1431 | KMT2C   | 1486 | BTNL2     |
| 1157 | RAD51C   | 1212 | CD5      | 1267 | APOL1    | 1322 | CHEK1    | 1377 | RPN1         | 1432 | ITPA    | 1487 | SEC63     |
| 1158 | NCR1     | 1213 | SERPINA7 | 1268 | GP1BA    | 1323 | SUFU     | 1378 | NFU1         | 1433 | RPS28   | 1488 | SHBG      |
| 1159 | ETFB     | 1214 | MIR182   | 1269 | KLRC1    | 1324 | SUMO1    | 1379 | PCCB         | 1434 | RPL31   | 1489 | CYBB      |
| 1160 | AUTS2    | 1215 | GFM1     | 1270 | LMF1     | 1325 | CLEC12A  | 1380 | UTS2         | 1435 | TREM1   | 1490 | CASP2     |
| 1161 | ALPL     | 1216 | ALG8     | 1271 | XBP1     | 1326 | MS4A1    | 1381 | FCGR1A       | 1436 | ATP7A   | 1491 | APEX1     |
| 1162 | PICK1    | 1217 | GOLM1    | 1272 | RPL26    | 1327 | MTAP     | 1382 | GSK3B        | 1437 | SLC10A2 | 1492 | GLE1      |
| 1163 | PEX19    | 1218 | HBG2     | 1273 | TAP2     | 1328 | CR2      | 1383 | VCP          | 1438 | PSEN1   | 1493 | SLC35A2   |
| 1164 | TBX5     | 1219 | BCKDHB   | 1274 | RNF31    | 1329 | UCA1     | 1384 | RPL15        | 1439 | NCOA2   | 1494 | PRKN      |
| 1165 | BMI1     | 1220 | CLCNKA   | 1275 | GRHPR    | 1330 | FANCB    | 1385 | AURKB        | 1440 | TCN2    | 1495 | OSTM1     |
| 1166 | FGFR3    | 1221 | PRKCA    | 1276 | CPS1     | 1331 | ANKRD1   | 1386 | FASN         | 1441 | SLC6A8  | 1496 | NTS       |
| 1167 | IFT80    | 1222 | COMT     | 1277 | NEU1     | 1332 | RPS29    | 1387 | NAMPT        | 1442 | TOP2A   | 1497 | MC2R      |
| 1168 | PAX2     | 1223 | SP1      | 1278 | CYBA     | 1333 | PCK2     | 1388 | CDA          | 1443 | SMARCB1 | 1498 | TIMP3     |
| 1169 | ETFA     | 1224 | TALDO1   | 1279 | MIR196A1 | 1334 | NDUFAF1  | 1389 | HDAC2        | 1444 | GSTA1   | 1499 | FOXA2     |
| 1170 | SKP2     | 1225 | NME1     | 1280 | RFX5     | 1335 | PTPN6    | 1390 | RPL18        | 1445 | SLC12A3 | 1500 | CNOT3     |
| 1171 | CRH      | 1226 | MIR128-2 | 1281 | MIR148A  | 1336 | TRMT10C  | 1391 | TH           | 1446 | FBP1    | 1501 | TMEM126B  |
| 1172 | PPBP     | 1227 | MIR328   | 1282 | SRP19    | 1337 | RHOA     | 1392 | PEX11B       | 1447 | PRKCSH  | 1502 | CRYAB     |
| 1173 | RFXANK   | 1228 | CCND2    | 1283 | NCL      | 1338 | NSMCE2   | 1393 | RPL35A       | 1448 | SLC1A2  | 1503 | CD2       |
| 1174 | RPS10    | 1229 | CFHR4    | 1284 | AMPD1    | 1339 | SAMHD1   | 1394 | HSD17B4      | 1449 | LRP6    | 1504 | CD9       |
| 1175 | MT-TV    | 1230 | PRKAG2   | 1285 | TTC7A    | 1340 | MIR214   | 1395 | VKORC1       | 1450 | MIR192  | 1505 | MAOA      |
| 1176 | FANCE    | 1231 | AGTR2    | 1286 | FGF      | 1341 | CCR2     | 1396 | DLAT         | 1451 | MPZ     | 1506 | KLRD1     |
| 1177 | IL1RAPL2 | 1232 | NPC2     | 1287 | MT-CO2   | 1342 | AMBP     | 1397 | KIR2DL1      | 1452 | MRPL44  | 1507 | CD96      |
| 1178 | BCHE     | 1233 | TEX14    | 1288 | GATM     | 1343 | MIR15B   | 1398 | LOC102723566 | 1453 | NSUN2   | 1508 | CRKL      |
| 1179 | STN1     | 1234 | BICC1    | 1289 | ASNS     | 1344 | PGF      | 1399 | FOXO3        | 1454 | BBS4    | 1509 | MYO5B     |
| 1180 | KDM6A    | 1235 | MIR424   | 1290 | LIPE     | 1345 | SF3B2    | 1400 | NDUFS1       | 1455 | GNMT    | 1510 | DIABLO    |
| 1181 | PYGL     | 1236 | TP73     | 1291 | RFXAP    | 1346 | GALK1    | 1401 | ISG20        | 1456 | C1S     | 1511 | IL18R1    |
| 1182 | MIR331   | 1237 | OPRM1    | 1292 | IL33     | 1347 | ASAH1    | 1402 | NR0B2        | 1457 | FTL     | 1512 | GLI3      |
| 1183 | LTF      | 1238 | CX3CR1   | 1293 | EVC      | 1348 | ABCA1    | 1403 | MATR3        | 1458 | SIGLEC5 | 1513 | FTO       |
| 1184 | CCDC115  | 1239 | FSHR     | 1294 | PDX1     | 1349 | PIK3CD   | 1404 | EGR1         | 1459 | LAMA2   | 1514 | PNP       |
| 1185 | IFIT1    | 1240 | DCTN1    | 1295 | NEK1     | 1350 | HCRT     | 1405 | SLC25A4      | 1460 | SOS1    | 1515 | CYP2A6    |
| 1186 | STEAP3   | 1241 | MIRLET7F | 1296 | PEX14    | 1351 | NCR3     | 1406 | P4HB         | 1461 | TNFSF15 | 1516 | DNASE1    |
| 1187 | BMP7     | 1242 | KLF4     | 1297 | MTFMT    | 1352 | DNAH2    | 1407 | PDE4D        | 1462 | TNFRSF9 | 1517 | AZU1      |
| 1188 | FASTKD2  | 1243 | MIR151A  | 1298 | SMN2     | 1353 | CACNA1C  | 1408 | CD3D         | 1463 | LARS2   | 1518 | HNRNP1    |
| 1189 | OTULIN   | 1244 | LDB3     | 1299 | PLA2G7   | 1354 | CDH2     | 1409 | TRIM37       | 1464 | RPS15A  | 1519 | IRF4      |
| 1190 | NCOR1    | 1245 | KIF7     | 1300 | CAPN3    | 1355 | VIP      | 1410 | DSG2         | 1465 | ERCC5   | 1520 | TNFRSF13C |
| 1191 | NCOR2    | 1246 | ITGAX    | 1301 | SLX4     | 1356 | NHLRC1   | 1411 | GPIHBP1      | 1466 | GNRH1   | 1521 | NARS2     |
| 1192 | LACTB    | 1247 | PEX16    | 1302 | GAST     | 1357 | SCT      | 1412 | MUSK         | 1467 | TAT     | 1522 | SAA2      |
| 1193 | CYP27B1  | 1248 | GDF2     | 1303 | CLDN16   | 1358 | ARID1B   | 1413 | CTC1         | 1468 | IDO1    | 1523 | CD27      |
| 1194 | EVC2     | 1249 | CEACAM5  | 1304 | TRD      | 1359 | CTSD     | 1414 | GNB3         | 1469 | COG8    | 1524 | CS        |
| 1195 | PEX3     | 1250 | SAA4     | 1305 | ABCG5    | 1360 | MEF2A    | 1415 | IRF9         | 1470 | ATRIP   | 1525 | PGM1      |
| 1196 | MAP2K2   | 1251 | ITGA4    | 1306 | MIR149   | 1361 | FCGR3B   | 1416 | DDOST        | 1471 | AGL     | 1526 | ATP11A    |
| 1197 | SOX9     | 1252 | F13A1    | 1307 | COA8     | 1362 | UCP2     | 1417 | MRC1         | 1472 | DLL4    | 1527 | FIG4      |
| 1198 | MIR145   | 1253 | MKKS     | 1308 | COL3A1   | 1363 | TMPO     | 1418 | IARS2        | 1473 | TRG     | 1528 | HM13      |
| 1199 | PEX2     | 1254 | PEX10    | 1309 | ENO2     | 1364 | MIR451A  | 1419 | MMAA         | 1474 | CAV3    | 1529 | SDC1      |
| 1200 | FHL1     | 1255 | BRD4     | 1310 | CFHR2    | 1365 | CD22     | 1420 | GOPC         | 1475 | HDAC6   | 1530 | PSMB4     |
| 1201 | HSPB1    | 1256 | EIF2S1   | 1311 | MIR326   | 1366 | SULT1A3  | 1421 | PLA2G2A      | 1476 | MMUT    | 1531 | ATP5F1A   |
| 1202 | CTSG     | 1257 | MUC5AC   | 1312 | SLC12A1  | 1367 | FAM13A   | 1422 | MIR144       | 1477 | LUC7L2  | 1532 | SPAG17    |
| 1203 | MYL3     | 1258 | CFLAR    | 1313 | CR1      | 1368 | CFAP92   | 1423 | KIAA0586     | 1478 | GPS2    | 1533 | PHOX      |
| 1204 | APAF1    | 1259 | CHKA     | 1314 | ZMPSTE24 | 1369 | MIR130B  | 1424 | SRF          | 1479 | MIR10A  | 1534 | MMP7      |
| 1205 | RPS27    | 1260 | SGSH     | 1315 | F10      | 1370 | FLI1     | 1425 | CLCN7        | 1480 | MGMT    | 1535 | CHD7      |
| 1206 | ARID5B   | 1261 | DDB1     | 1316 | CDKN2C   | 1371 | TRAF3IP1 | 1426 | DYNC2I1      | 1481 | IL21R   | 1536 | MIR29B1   |
| 1207 | SCNN1A   | 1262 | PCNA     | 1317 | EPCAM    | 1372 | JUP      | 1427 | APLN         | 1482 | S100A9  | 1537 | AFDN      |
| 1208 | EIF2AK1  | 1263 | VAV1     | 1318 | SERAC1   | 1373 | RAC1     | 1428 | FLNB         | 1483 | AMH     | 1538 | PHF6      |
| 1209 | LEPQTL1  | 1264 | ICOS     | 1319 | RAD21    | 1374 | MIR423   | 1429 | CEBPE        | 1484 | UQCRCF1 | 1539 | NDUFB11   |
| 1210 | SRPRA    | 1265 | FGL2     | 1320 | WRN      | 1375 | TUSC7    | 1430 | SOX2         | 1485 | ARL13B  | 1540 | TSPAN7    |

Table S2. 2913 ALF-related target genes (continued)

| No.  | Gene         | No.  | Gene         | No.  | Gene      | No.  | Gene    | No.  | Gene          | No.  | Gene     | No.  | Gene       |
|------|--------------|------|--------------|------|-----------|------|---------|------|---------------|------|----------|------|------------|
| 1541 | BPI          | 1596 | ERBB4        | 1651 | KCNK3     | 1706 | ACTA2   | 1761 | NNT           | 1816 | H4C1     | 1871 | TNFSF12    |
| 1542 | DPYD         | 1597 | MIR30C1      | 1652 | LZTFL1    | 1707 | FTH1    | 1762 | PRKG1         | 1817 | CPA1     | 1872 | SPTAN1     |
| 1543 | GYS1         | 1598 | HNRNPA1      | 1653 | TBC1D20   | 1708 | IGHE    | 1763 | HPD           | 1818 | GLUD1    | 1873 | MIR24-1    |
| 1544 | TCF7L2       | 1599 | CREB3L3      | 1654 | ITIH4     | 1709 | APOA5   | 1764 | COG2          | 1819 | MAOB     | 1874 | MICA       |
| 1545 | EIF4E        | 1600 | SOX4         | 1655 | HELLS     | 1710 | CCAT1   | 1765 | TNFSF13B      | 1820 | EPX      | 1875 | IL23A      |
| 1546 | NDUFAF8      | 1601 | SNCA         | 1656 | NR1H3     | 1711 | RMND1   | 1766 | SLC6A3        | 1821 | EHHADH   | 1876 | PROC       |
| 1547 | ACD          | 1602 | NAT2         | 1657 | MIR338    | 1712 | ACTG1   | 1767 | S100A8        | 1822 | RMND5B   | 1877 | COG7       |
| 1548 | GPD1         | 1603 | CYP21A2      | 1658 | HTR1A     | 1713 | FUT4    | 1768 | TXN           | 1823 | MT-TF    | 1878 | NGF        |
| 1549 | HSPA8        | 1604 | LOC105371049 | 1659 | CHI3L1    | 1714 | CEACAM3 | 1769 | CCR7          | 1824 | VEGFC    | 1879 | RPL27      |
| 1550 | CD59         | 1605 | DICER1       | 1660 | USB1      | 1715 | PITX2   | 1770 | KCNN4         | 1825 | CITED2   | 1880 | AP1B1      |
| 1551 | HHEX         | 1606 | P2RY12       | 1661 | MGP       | 1716 | MYL2    | 1771 | PPIA          | 1826 | TERF1    | 1881 | G6PC3      |
| 1552 | OCRL         | 1607 | SOX10        | 1662 | HLA-DRA   | 1717 | CYP24A1 | 1772 | CYP27A1       | 1827 | MMP12    | 1882 | RBP1       |
| 1553 | EPRS1        | 1608 | MTRR         | 1663 | NDUFA6    | 1718 | CNR1    | 1773 | TXNRD2        | 1828 | HVBS7    | 1883 | UGT1A7     |
| 1554 | APP          | 1609 | PTPN2        | 1664 | HOXA10    | 1719 | EPAS1   | 1774 | CLU           | 1829 | ERG      | 1884 | SYN        |
| 1555 | CYB5R3       | 1610 | ATP2A2       | 1665 | LIFR      | 1720 | PNPLA6  | 1775 | C1QTNF3-AMACR | 1830 | FURIN    | 1885 | MIR128-1   |
| 1556 | RASA1        | 1611 | LRP2         | 1666 | MKI67     | 1721 | IFT52   | 1776 | YAP1          | 1831 | OPTN     | 1886 | CARS1      |
| 1557 | SHC1         | 1612 | REG3A        | 1667 | CEP83     | 1722 | ALG2    | 1777 | ATG5          | 1832 | NT5C2    | 1887 | HNRNPK     |
| 1558 | HBB-LCR      | 1613 | PORCN        | 1668 | IL36RN    | 1723 | ITGA5   | 1778 | HTR2A         | 1833 | XIST     | 1888 | TPI1       |
| 1559 | KCNJ5        | 1614 | ADAM17       | 1669 | NCF1      | 1724 | ABCC5   | 1779 | ID4           | 1834 | CRAT     | 1889 | CA2        |
| 1560 | FCGR2B       | 1615 | ALOX5AP      | 1670 | GFI1B     | 1725 | HSD11B2 | 1780 | ITGA2         | 1835 | TMEM70   | 1890 | GGH        |
| 1561 | EIF4EBP1     | 1616 | OLR1         | 1671 | TAP1      | 1726 | GALC    | 1781 | ORM1          | 1836 | AGO2     | 1891 | AARS1      |
| 1562 | TYR          | 1617 | CPLANE1      | 1672 | SUCLG1    | 1727 | PTK2    | 1782 | BUB1          | 1837 | FGF7     | 1892 | CDX2       |
| 1563 | YARS1        | 1618 | KLK3         | 1673 | TRPM3     | 1728 | ENO1    | 1783 | ACP1          | 1838 | INHA     | 1893 | PRDX1      |
| 1564 | STMN1        | 1619 | WNT5A        | 1674 | MLH1      | 1729 | MAPT    | 1784 | S100A12       | 1839 | NCOA3    | 1894 | DDIT3      |
| 1565 | TSR2         | 1620 | AOC3         | 1675 | DYRK1A    | 1730 | PDHA1   | 1785 | ACP5          | 1840 | CDK9     | 1895 | ATP6AP2    |
| 1566 | BBS9         | 1621 | GPX3         | 1676 | TGM2      | 1731 | RPS20   | 1786 | GRK2          | 1841 | F12      | 1896 | SLC35C1    |
| 1567 | TP63         | 1622 | PCCA         | 1677 | TNFRSF10A | 1732 | FMO3    | 1787 | SPINK5        | 1842 | MCCC2    | 1897 | POLR3A     |
| 1568 | LOC100505541 | 1623 | HOGA1        | 1678 | WNT4      | 1733 | DLL1    | 1788 | NDUFV2        | 1843 | IL9      | 1898 | RASSF1     |
| 1569 | DDIT3        | 1624 | E2F1         | 1679 | RASGRP1   | 1734 | CUBN    | 1789 | BOLA3         | 1844 | GHRHR    | 1899 | SLC3A1     |
| 1570 | PKHD1L1      | 1625 | PMPCA        | 1680 | ABCG8     | 1735 | NFKB2   | 1790 | AQP1          | 1845 | PLIN1    | 1900 | CDH23      |
| 1571 | KHDRBS1      | 1626 | OXT          | 1681 | PRKD1     | 1736 | POLR2A  | 1791 | IL2RG         | 1846 | IRAK4    | 1901 | LTBP4      |
| 1572 | DAXX         | 1627 | PRNP         | 1682 | DDC       | 1737 | BAK1    | 1792 | CXCR5         | 1847 | SKI      | 1902 | BIRC2      |
| 1573 | NUBPL        | 1628 | ACSF3        | 1683 | MIR1225   | 1738 | FOXM1   | 1793 | ABHD5         | 1848 | ADK      | 1903 | FES        |
| 1574 | TCAP         | 1629 | SMAD7        | 1684 | UQCRB     | 1739 | CYP11B1 | 1794 | PRKCB         | 1849 | UBA1     | 1904 | PLCE1      |
| 1575 | TXNDC15      | 1630 | HRH2         | 1685 | PNKD      | 1740 | IFITM3  | 1795 | DPP9          | 1850 | EIF2B3   | 1905 | MT-TS1     |
| 1576 | FBXL4        | 1631 | MIR212       | 1686 | SPRTN     | 1741 | COX10   | 1796 | COL1A2        | 1851 | ARID1A   | 1906 | FGF21      |
| 1577 | NDUFAF5      | 1632 | MIR335       | 1687 | KDM1A     | 1742 | HOXA7   | 1797 | NAXE          | 1852 | DRD2     | 1907 | PSC        |
| 1578 | SLC11A2      | 1633 | AOPEP        | 1688 | ATG7      | 1743 | POSTN   | 1798 | NDUFS8        | 1853 | RPL35    | 1908 | TKT        |
| 1579 | NUP62        | 1634 | GPC3         | 1689 | APOA2     | 1744 | SPARC   | 1799 | PC            | 1854 | DDB2     | 1909 | SEMA3C     |
| 1580 | XPO1         | 1635 | CIDEC        | 1690 | DACT1     | 1745 | CCR9    | 1800 | FBLN5         | 1855 | HVBS8    | 1910 | CTH        |
| 1581 | PAPPA        | 1636 | IL23R        | 1691 | POR       | 1746 | SLC3A2  | 1801 | MIR374A       | 1856 | MUS81    | 1911 | PKM        |
| 1582 | MRPL12       | 1637 | PON2         | 1692 | INF2      | 1747 | SUCLA2  | 1802 | HBA1          | 1857 | PDGFB    | 1912 | NANOG      |
| 1583 | FLT3LG       | 1638 | TNFRSF11A    | 1693 | MMP14     | 1748 | MIR30E  | 1803 | ACSL4         | 1858 | CCND3    | 1913 | INPP5D     |
| 1584 | IL1RL1       | 1639 | MIR193A      | 1694 | H4-16     | 1749 | RTN4    | 1804 | GCDH          | 1859 | SOD3     | 1914 | MT-TI      |
| 1585 | COG4         | 1640 | USP18        | 1695 | IREB2     | 1750 | LTC4S   | 1805 | POU2AF1       | 1860 | LPIN2    | 1915 | FGG        |
| 1586 | VAPB         | 1641 | RNASEH2I     | 1696 | MIR31     | 1751 | CXCR6   | 1806 | RIPK1         | 1861 | TAF15    | 1916 | ATF4       |
| 1587 | MIR27B       | 1642 | TBX1         | 1697 | ZEB2      | 1752 | WAS     | 1807 | TRAPPC11      | 1862 | BMPR1A   | 1917 | CLDN19     |
| 1588 | RARS1        | 1643 | VIPR1        | 1698 | CD69      | 1753 | NDUFB9  | 1808 | DGAT1         | 1863 | RNASEH2C | 1918 | PRSS2      |
| 1589 | MRPS34       | 1644 | IARS1        | 1699 | DARS2     | 1754 | NDUFS3  | 1809 | IRS2          | 1864 | BECN1    | 1919 | TBX21      |
| 1590 | NEK9         | 1645 | TRIM22       | 1700 | RPGRIP1   | 1755 | MLF1    | 1810 | DEPDC5        | 1865 | CARD14   | 1920 | ATP1A3     |
| 1591 | KCNH2        | 1646 | DYNC2LI1     | 1701 | CXCL2     | 1756 | BMP4    | 1811 | AQP4          | 1866 | ASCL1    | 1921 | CD68       |
| 1592 | NAIP         | 1647 | CTNS         | 1702 | WT1-AS    | 1757 | ADORA1  | 1812 | EIF2AK4       | 1867 | MT-TT    | 1922 | IGHV4-38-2 |
| 1593 | SIN3A        | 1648 | GNAQ         | 1703 | GLI2      | 1758 | CD24    | 1813 | SI            | 1868 | SERPING1 | 1923 | VTN        |
| 1594 | NDUFAF3      | 1649 | YARS2        | 1704 | SLC30A10  | 1759 | PGR     | 1814 | BBS7          | 1869 | LRBA     | 1924 | FUS        |
| 1595 | KHK          | 1650 | LYRM7        | 1705 | LGALS9    | 1760 | NDUFA1  | 1815 | BAD           | 1870 | CYP26A1  | 1925 | GAS6       |

Table S2. 2913 ALF-related target genes (continued)

| No.  | Gene      | No.  | Gene     | No.  | Gene     | No.  | Gene     | No.  | Gene     | No.  | Gene         | No.  | Gene     |
|------|-----------|------|----------|------|----------|------|----------|------|----------|------|--------------|------|----------|
| 1926 | SLAMF1    | 1981 | SSBP1    | 2036 | PIK3CB   | 2091 | ELP1     | 2146 | FCER2    | 2201 | AQP9         | 2256 | DNTT     |
| 1927 | MIR6511B1 | 1982 | CD48     | 2037 | CTF1     | 2092 | ALG1     | 2147 | BRD2     | 2202 | THRA         | 2257 | PLN      |
| 1928 | METTL3    | 1983 | SLC11A1  | 2038 | COL2A1   | 2093 | COG1     | 2148 | SPCS1    | 2203 | HOXA-AS2     | 2258 | UGT1A3   |
| 1929 | HNRNPA2B1 | 1984 | GAL      | 2039 | KIF1B    | 2094 | APC2     | 2149 | MYOCD    | 2204 | PLA2R1       | 2259 | UGT1A4   |
| 1930 | OSM       | 1985 | HCFC1    | 2040 | GUCY2C   | 2095 | H3-2     | 2150 | HTR3A    | 2205 | LRRK2        | 2260 | BNC1     |
| 1931 | STING1    | 1986 | XPNPEP3  | 2041 | CD3E     | 2096 | MIR615   | 2151 | AFF4     | 2206 | FCN2         | 2261 | MCM8     |
| 1932 | VPS33A    | 1987 | FABP2    | 2042 | ABCB6    | 2097 | C5AR1    | 2152 | RRM2     | 2207 | TNFRSF4      | 2262 | DPY19L2  |
| 1933 | F9        | 1988 | CDC25A   | 2043 | DUSP1    | 2098 | BRF1     | 2153 | MIR133A1 | 2208 | SSR4         | 2263 | MYPN     |
| 1934 | PCBP2     | 1989 | UBE2L3   | 2044 | CDH5     | 2099 | CEP120   | 2154 | HOXA5    | 2209 | FOXP2        | 2264 | DLC1     |
| 1935 | NDUFAF4   | 1990 | AKT3     | 2045 | CEACAM6  | 2100 | NHLRC2   | 2155 | HPSE     | 2210 | COQ4         | 2265 | UGT1A10  |
| 1936 | MIR486-1  | 1991 | RBPJ     | 2046 | IL10RA   | 2101 | PAX4     | 2156 | BIRC3    | 2211 | ATF6         | 2266 | COX8A    |
| 1937 | TNFRSF6B  | 1992 | MCM4     | 2047 | A2ML1    | 2102 | ANGPTL4  | 2157 | DOT1L    | 2212 | RPS27A       | 2267 | NGLY1    |
| 1938 | SLC22A6   | 1993 | STAT6    | 2048 | KLF9-DT  | 2103 | MADD     | 2158 | GSTZ1    | 2213 | VPREB1       | 2268 | KCNE2    |
| 1939 | MIR208B   | 1994 | CCNC     | 2049 | MLN      | 2104 | SDHC     | 2159 | FGF1     | 2214 | PNPLA8       | 2269 | MT-TN    |
| 1940 | APOA4     | 1995 | COL4A1   | 2050 | FUT8     | 2105 | F2R      | 2160 | PSTPIP1  | 2215 | TRIP-TREX    | 2270 | MICOS13  |
| 1941 | HDAC3     | 1996 | RNASEH2A | 2051 | MIR590   | 2106 | PODXL    | 2161 | XRCC5    | 2216 | UMPS         | 2271 | KDM5A    |
| 1942 | OPA1      | 1997 | ID1      | 2052 | SP100    | 2107 | FNDC5    | 2162 | MARCA1   | 2217 | STOX1        | 2272 | MYLK     |
| 1943 | FPGS      | 1998 | LMNB2    | 2053 | DEFB4A   | 2108 | SGCD     | 2163 | SMARCA2  | 2218 | BHLHE40      | 2273 | ACOX2    |
| 1944 | SMC1A     | 1999 | MYRF     | 2054 | DNM1L    | 2109 | IRAK1    | 2164 | CLIC2    | 2219 | SLC22A2      | 2274 | UGT2B7   |
| 1945 | WFS1      | 2000 | CDC6     | 2055 | ANG      | 2110 | TRIP13   | 2165 | FER      | 2220 | BCORL1       | 2275 | GCKR     |
| 1946 | SLC52A3   | 2001 | SPART    | 2056 | DLK1     | 2111 | DMBT1    | 2166 | HCK      | 2221 | LOC100507346 | 2276 | TMEM199  |
| 1947 | KARS1     | 2002 | PEX7     | 2057 | MIR340   | 2112 | CEP57    | 2167 | KIF1C    | 2222 | CLEC7A       | 2277 | ONECUT1  |
| 1948 | NCR2      | 2003 | BDKRB2   | 2058 | IDUA     | 2113 | CPQ      | 2168 | DHCR24   | 2223 | ATP6AP1      | 2278 | MSH6     |
| 1949 | MIR141    | 2004 | CCR1     | 2059 | PIGL     | 2114 | MAP3K7   | 2169 | SERPINA6 | 2224 | PRKCE        | 2279 | UNC13D   |
| 1950 | TNFSF4    | 2005 | TFAP2A   | 2060 | ACKR1    | 2115 | UGT1A8   | 2170 | AKR1B1   | 2225 | ATP6V1B1     | 2280 | CCNQ1OT1 |
| 1951 | SALL4     | 2006 | PIEZO1   | 2061 | GDF1     | 2116 | TRPV1    | 2171 | TSLP     | 2226 | MIR10B       | 2281 | PEMT     |
| 1952 | COX4I1    | 2007 | UBA7     | 2062 | BST2     | 2117 | IVNS1ABF | 2172 | RAB27A   | 2227 | SLC5A1       | 2282 | ADIPOR1  |
| 1953 | UQCRC2    | 2008 | CACNA1A  | 2063 | HARS1    | 2118 | UCP1     | 2173 | SLC39A8  | 2228 | TTN-AS1      | 2283 | STX11    |
| 1954 | EARS2     | 2009 | CD47     | 2064 | WNT2B    | 2119 | TRIM32   | 2174 | CCR4     | 2229 | SETBP1       | 2284 | MOGS     |
| 1955 | TET1      | 2010 | IGFBP7   | 2065 | BCL11A   | 2120 | CCL20    | 2175 | CRABP1   | 2230 | MLLT10       | 2285 | ADH1B    |
| 1956 | ALDH1A1   | 2011 | PANK2    | 2066 | C11orf65 | 2121 | AFF2     | 2176 | FYN      | 2231 | PICALM       | 2286 | LMO1     |
| 1957 | GRP       | 2012 | TUBB     | 2067 | PTK2B    | 2122 | MAPK10   | 2177 | GPX1     | 2232 | NR5A1        | 2287 | GLS2     |
| 1958 | STXBP2    | 2013 | SETX     | 2068 | VANGL2   | 2123 | TET3     | 2178 | EMD      | 2233 | CHIC2        | 2288 | RALGAPA1 |
| 1959 | NDUFB3    | 2014 | CD226    | 2069 | IVD      | 2124 | SLC9A1   | 2179 | CXCL5    | 2234 | TNNI3        | 2289 | GLB1     |
| 1960 | PDE4A     | 2015 | MMAB     | 2070 | DAPK1    | 2125 | TJP1     | 2180 | GLRX5    | 2235 | STAG3        | 2290 | SLC26A1  |
| 1961 | ERN1      | 2016 | DTNA     | 2071 | CELA2A   | 2126 | ATXN2    | 2181 | GRIN2B   | 2236 | BRDT         | 2291 | PARS2    |
| 1962 | SSB       | 2017 | CCNB1    | 2072 | MIR99A   | 2127 | H4C2     | 2182 | CCR3     | 2237 | NUMA1        | 2292 | DNAH17   |
| 1963 | CCL18     | 2018 | TIMMDC1  | 2073 | CDK8     | 2128 | H4C3     | 2183 | MUC16    | 2238 | TBL1XR1      | 2293 | BHMT     |
| 1964 | SPIB      | 2019 | LRPPRC   | 2074 | IL17F    | 2129 | UGT1A    | 2184 | MAP3K5   | 2239 | PFKL         | 2294 | TMPRSS6  |
| 1965 | MIRLET7A1 | 2020 | ARG2     | 2075 | ADD1     | 2130 | USH2A    | 2185 | CTBP1    | 2240 | AFF1         | 2295 | TKFC     |
| 1966 | CHRND     | 2021 | PTF1A    | 2076 | CES1     | 2131 | MIR100HC | 2186 | UCHL1    | 2241 | SFTPB        | 2296 | UGT1A5   |
| 1967 | NOTCH4    | 2022 | CARS2    | 2077 | MIR125B2 | 2132 | CTSL     | 2187 | CD2AP    | 2242 | BAALC        | 2297 | STX1A    |
| 1968 | TNPO3     | 2023 | ATP4A    | 2078 | SLC2A4   | 2133 | BUB1B    | 2188 | RAI1     | 2243 | KAT6A        | 2298 | COX6B1   |
| 1969 | ATP6V0A2  | 2024 | FGF8     | 2079 | ALG11    | 2134 | RAPSN    | 2189 | SCN4A    | 2244 | MCM9         | 2299 | NDUFB8   |
| 1970 | MYL1      | 2025 | GOT1     | 2080 | MDK      | 2135 | RECQL4   | 2190 | ADAMTSL  | 2245 | PPA2         | 2300 | HSD17B10 |
| 1971 | DCLRE1C   | 2026 | CISH     | 2081 | AICDA    | 2136 | AHR      | 2191 | UBR1     | 2246 | SLC13A3      | 2301 | UBE2T    |
| 1972 | C2CD3     | 2027 | TCOF1    | 2082 | SLC22A4  | 2137 | KLF6     | 2192 | NOX4     | 2247 | RAD54L       | 2302 | ACACA    |
| 1973 | DYNC2I2   | 2028 | CAMK2D   | 2083 | UCN      | 2138 | FLVCR2   | 2193 | CA5A     | 2248 | TLX1         | 2303 | PRKAB1   |
| 1974 | TRAF6     | 2029 | MOG      | 2084 | ETS1     | 2139 | SNAI1    | 2194 | MDH2     | 2249 | FRAXA        | 2304 | HULC     |
| 1975 | MASP2     | 2030 | NDUFA11  | 2085 | OXA1L    | 2140 | CTRC     | 2195 | UGT1A6   | 2250 | TLX3         | 2305 | TACO1    |
| 1976 | NDUFS6    | 2031 | ADIPOR2  | 2086 | PKLR     | 2141 | PAX6     | 2196 | ADAMTS1  | 2251 | PLCZ1        | 2306 | PRPS1    |
| 1977 | MT-ATP8   | 2032 | C1QBP    | 2087 | IFITM1   | 2142 | UQCRCQ   | 2197 | COPA     | 2252 | UGT1A9       | 2307 | TPM1     |
| 1978 | ATP12A    | 2033 | DPM1     | 2088 | CYP2C8   | 2143 | AURKA    | 2198 | FHL2     | 2253 | BLVRA        | 2308 | MSH4     |
| 1979 | SUOX      | 2034 | PSMB10   | 2089 | AKR1A1   | 2144 | FGFR2    | 2199 | DOCK6    | 2254 | CDH17        | 2309 | HBA2     |
| 1980 | TNFAIP2   | 2035 | COX15    | 2090 | HSD11B1  | 2145 | FOXF1    | 2200 | PTGIS    | 2255 | PHKB         | 2310 | ADH1C    |

Table S2. 2913 ALF-related target genes (continued)

| No.  | Gene         | No.  | Gene         | No.  | Gene         | No.  | Gene     | No.  | Gene     | No.  | Gene         | No.  | Gene     |
|------|--------------|------|--------------|------|--------------|------|----------|------|----------|------|--------------|------|----------|
| 2311 | GNB          | 2366 | MIR200A      | 2421 | SLC4A2       | 2476 | RMRP     | 2531 | CHGB     | 2586 | LOC113633877 | 2641 | SLC51A   |
| 2312 | PSEN2        | 2367 | MHRT         | 2422 | NRG1         | 2477 | PKD2L1   | 2532 | BAZ1B    | 2587 | SERPINB1     | 2642 | XPA      |
| 2313 | BSND         | 2368 | NDUFB10      | 2423 | CEL          | 2478 | CLPP     | 2533 | ARID2    | 2588 | SLC25A19     | 2643 | ALDH18A1 |
| 2314 | PRKAA1       | 2369 | NEB          | 2424 | NANOS1       | 2479 | ELAC2    | 2534 | PLD3     | 2589 | PRDX3        | 2644 | SHMT1    |
| 2315 | ACTN2        | 2370 | FXN          | 2425 | GRK5         | 2480 | CYP3A7   | 2535 | IGF2BP2  | 2590 | FCHO1        | 2645 | CSTB     |
| 2316 | CASK         | 2371 | MFN2         | 2426 | HYDIN        | 2481 | LDB1     | 2536 | HBZ      | 2591 | CLEC4G       | 2646 | KRT14    |
| 2317 | TMEM43       | 2372 | CTSA         | 2427 | LOC111674472 | 2482 | SCP2     | 2537 | PIBF1    | 2592 | MAGT1        | 2647 | STARD13  |
| 2318 | FGF19        | 2373 | SALL2        | 2428 | PKP2         | 2483 | CANX     | 2538 | TRPC6    | 2593 | MIR205       | 2648 | NAPB     |
| 2319 | PKD1L1       | 2374 | GOT2         | 2429 | ABCC9        | 2484 | JMJD1C   | 2539 | EIF2B2   | 2594 | PMAIP1       | 2649 | NLRP1    |
| 2320 | FGL1         | 2375 | DYNLT2B      | 2430 | CTTN         | 2485 | NGFR     | 2540 | KIF3A    | 2595 | PROS1        | 2650 | PDE4B    |
| 2321 | CCDC47       | 2376 | HGSNAT       | 2431 | PEPD         | 2486 | GJB2     | 2541 | MAT2A    | 2596 | LOC113664106 | 2651 | TCF7     |
| 2322 | GJB1         | 2377 | GSTM3        | 2432 | GPBAR1       | 2487 | RAC2     | 2542 | LAS1L    | 2597 | NTRK2        | 2652 | FOLR2    |
| 2323 | EYA4         | 2378 | SCNN1G       | 2433 | DVL2         | 2488 | PRKDC    | 2543 | C1R      | 2598 | APEH         | 2653 | DAO      |
| 2324 | SCD          | 2379 | GBA2         | 2434 | ARSB         | 2489 | HK2      | 2544 | CEP41    | 2599 | STS          | 2654 | WWOX     |
| 2325 | AOX1         | 2380 | HGD          | 2435 | PRKACA       | 2490 | MESD     | 2545 | PRLR     | 2600 | SNRPN        | 2655 | SLC16A2  |
| 2326 | LECT2        | 2381 | MEGF10       | 2436 | ARSA         | 2491 | PDHX     | 2546 | SLC19A2  | 2601 | MRPS28       | 2656 | TFPI     |
| 2327 | PET100       | 2382 | AK7          | 2437 | ACACB        | 2492 | CFTR-AS1 | 2547 | FLVCR1   | 2602 | MIR200C      | 2657 | ZRSR2    |
| 2328 | SLC22A1      | 2383 | GCLC         | 2438 | PRDM2        | 2493 | CEACAM1  | 2548 | FARSA    | 2603 | UGCG         | 2658 | GJA5     |
| 2329 | FAN1         | 2384 | CES2         | 2439 | SIL1         | 2494 | MOCOS    | 2549 | MFSD2A   | 2604 | PLP1         | 2659 | SLC22A7  |
| 2330 | TMEM165      | 2385 | CYB5A        | 2440 | GSTA2        | 2495 | LYRM4    | 2550 | CTNNA1   | 2605 | MRAP         | 2660 | TNC      |
| 2331 | TMPRSS15     | 2386 | SREBF2       | 2441 | ARHGAP9      | 2496 | SEC61A1  | 2551 | OGG1     | 2606 | PTRH2        | 2661 | OCA2     |
| 2332 | PTPN3        | 2387 | GNPTAB       | 2442 | LYST         | 2497 | DPM2     | 2552 | APTX     | 2607 | AHSP         | 2662 | P2RX7    |
| 2333 | CCNH         | 2388 | DHDDS        | 2443 | RARS2        | 2498 | SIRT3    | 2553 | SMARCE1  | 2608 | YY1AP1       | 2663 | TAB2     |
| 2334 | RBM20        | 2389 | MYOT         | 2444 | AFF3         | 2499 | SARDH    | 2554 | NDUFA9   | 2609 | NRP1         | 2664 | HAND2    |
| 2335 | CSRP3        | 2390 | IFT88        | 2445 | LIMK1        | 2500 | RGN      | 2555 | PLOD1    | 2610 | PDHA2        | 2665 | PRKCQ    |
| 2336 | SCNN1B       | 2391 | ESR2         | 2446 | FABP12       | 2501 | MAN1B1   | 2556 | KLKB1    | 2611 | ERCC3        | 2666 | KCNH1    |
| 2337 | SULT2A1      | 2392 | SEC23B       | 2447 | COA3         | 2502 | MARS2    | 2557 | MGAM     | 2612 | NDUFA10      | 2667 | GAMT     |
| 2338 | MIR29C       | 2393 | LOC107980440 | 2448 | TTC19        | 2503 | DUSP6    | 2558 | MN1      | 2613 | PURB         | 2668 | NLRP12   |
| 2339 | DHCR7        | 2394 | RARRES2      | 2449 | STT3B        | 2504 | ANGPTL8  | 2559 | B4GALT1  | 2614 | LIN28B       | 2669 | XRCC3    |
| 2340 | STAG2        | 2395 | DNASE1L3     | 2450 | AXIN2        | 2505 | HEXB     | 2560 | NPC1L1   | 2615 | GALNS        | 2670 | TRIB3    |
| 2341 | CBFA2T2      | 2396 | BTBD         | 2451 | CEP85L       | 2506 | ADRA2C   | 2561 | FDFT1    | 2616 | TFDP1        | 2671 | EVPL     |
| 2342 | COLEC10      | 2397 | GYPC         | 2452 | FCN3         | 2507 | CD82     | 2562 | CRYAA    | 2617 | ORM2         | 2672 | GK       |
| 2343 | PON3         | 2398 | GALM         | 2453 | UBD          | 2508 | CFP      | 2563 | NEFH     | 2618 | TBX4         | 2673 | CLPX     |
| 2344 | IDS          | 2399 | PFKM         | 2454 | GHRH         | 2509 | MIR154   | 2564 | CUL3     | 2619 | SDHAF1       | 2674 | SUMF1    |
| 2345 | LOC107982234 | 2400 | AKR1C2       | 2455 | PHYH         | 2510 | RELN     | 2565 | PTP4A3   | 2620 | NOTAIRM      | 2675 | GTF2IRD1 |
| 2346 | LMOD3        | 2401 | SLC46A1      | 2456 | CYBC1        | 2511 | FMO1     | 2566 | ALDOA    | 2621 | GPHN         | 2676 | APOC1    |
| 2347 | CLMP         | 2402 | COG6         | 2457 | NEUROD1      | 2512 | BLK      | 2567 | ATP5F1E  | 2622 | ODC1         | 2677 | KAT6B    |
| 2348 | CERS1        | 2403 | KRT5         | 2458 | VRK2         | 2513 | RFWD3    | 2568 | TWIST1   | 2623 | FOXA1        | 2678 | COQ8B    |
| 2349 | FGFR4        | 2404 | GAS5         | 2459 | MIR132       | 2514 | MLLT6    | 2569 | AFG3L2   | 2624 | KISS1        | 2679 | ACO1     |
| 2350 | EPHX2        | 2405 | DNM2         | 2460 | PHOX2B       | 2515 | MIR183   | 2570 | MRPL3    | 2625 | VPS11        | 2680 | MEF2C    |
| 2351 | LTBP3        | 2406 | NAT1         | 2461 | LYZ          | 2516 | TUFM     | 2571 | HSF2BP   | 2626 | CAMP         | 2681 | VPS37A   |
| 2352 | AKR1C4       | 2407 | HBG1         | 2462 | KEAP1        | 2517 | ABCG1    | 2572 | AAAS     | 2627 | ITK          | 2682 | BCL2L2   |
| 2353 | TTC21A       | 2408 | KLF1         | 2463 | H6PD         | 2518 | PHGDH    | 2573 | NU4ATA   | 2628 | CLPB         | 2683 | SGK1     |
| 2354 | PPP2R3C      | 2409 | MSR1         | 2464 | INTU         | 2519 | PLCG1    | 2574 | SPTB     | 2629 | WNT1         | 2684 | MASP1    |
| 2355 | KIAA0319L    | 2410 | MIR107       | 2465 | PREPL        | 2520 | SLC7A9   | 2575 | AK2      | 2630 | PLTP         | 2685 | PUS1     |
| 2356 | IKZF3        | 2411 | MAD2L2       | 2466 | MIR26A1      | 2521 | OXCT1    | 2576 | ADRB3    | 2631 | GPC4         | 2686 | F13B     |
| 2357 | FABP4        | 2412 | PIK3R2       | 2467 | LOC111674475 | 2522 | GTF2I    | 2577 | GREM1    | 2632 | NEXN         | 2687 | SPN      |
| 2358 | HELLPAR      | 2413 | SLC2A10      | 2468 | SLCO1A2      | 2523 | GRN      | 2578 | SQOR     | 2633 | MERTK        | 2688 | ADCY6    |
| 2359 | EPHB4        | 2414 | MTHFD1       | 2469 | F11          | 2524 | POLD1    | 2579 | GP1BB    | 2634 | NAGA         | 2689 | SMARCC2  |
| 2360 | ATPAF2       | 2415 | ANGPTL3      | 2470 | TRIB1        | 2525 | DNA2     | 2580 | SFRP1    | 2635 | NSD2         | 2690 | TPP1     |
| 2361 | PLIN2        | 2416 | SPTA1        | 2471 | CPB2         | 2526 | NFS1     | 2581 | SLC39A14 | 2636 | PTPN1        | 2691 | IAPP     |
| 2362 | FLAD1        | 2417 | JAGN1        | 2472 | LRP1         | 2527 | SLC39A4  | 2582 | CYP8B1   | 2637 | SULT1A1      | 2692 | MCU      |
| 2363 | MYOD1        | 2418 | M6PR         | 2473 | NFIX         | 2528 | COL6A2   | 2583 | SERPINB3 | 2638 | RFC2         | 2693 | MIR184   |
| 2364 | MAFB         | 2419 | PRKAA2       | 2474 | AIFM1        | 2529 | TTPA     | 2584 | SALL1    | 2639 | DEFB1        | 2694 | ROBO1    |
| 2365 | MAN2B1       | 2420 | ID2          | 2475 | FUCA1        | 2530 | UTP4     | 2585 | NCF2     | 2640 | GLYAT        | 2695 | HMGCS2   |

Table S2. 2913 ALF-related target genes (continued)

| No.  | Gene          | No.  | Gene     | No.  | Gene         | No.  | Gene          | No. | Gene | No. | Gene | No. | Gene |
|------|---------------|------|----------|------|--------------|------|---------------|-----|------|-----|------|-----|------|
| 2696 | SLC4A4        | 2751 | ACVR2B   | 2806 | CASC15       | 2861 | SEC61B        |     |      |     |      |     |      |
| 2697 | NPR2          | 2752 | FADS1    | 2807 | FADS2        | 2862 | MRE11         |     |      |     |      |     |      |
| 2698 | ALG12         | 2753 | WNT3A    | 2808 | NDE1         | 2863 | CHRNA1        |     |      |     |      |     |      |
| 2699 | HSD3B2        | 2754 | APCS     | 2809 | MSLN         | 2864 | KLRC2         |     |      |     |      |     |      |
| 2700 | OGDH          | 2755 | ACTG2    | 2810 | SNAI2        | 2865 | NCF4          |     |      |     |      |     |      |
| 2701 | HOXA13        | 2756 | STARD3   | 2811 | KCNB1        | 2866 | KCNA5         |     |      |     |      |     |      |
| 2702 | PEG10         | 2757 | APLNR    | 2812 | ETS2         | 2867 | WNT7A         |     |      |     |      |     |      |
| 2703 | GADD45G       | 2758 | TBL2     | 2813 | FTCD         | 2868 | KRT20         |     |      |     |      |     |      |
| 2704 | DDAH1         | 2759 | PCSK1    | 2814 | LHX4         | 2869 | TFDP3         |     |      |     |      |     |      |
| 2705 | KCNJ1         | 2760 | PYY      | 2815 | TPM3         | 2870 | GNA11         |     |      |     |      |     |      |
| 2706 | ALG6          | 2761 | NES      | 2816 | MIR98        | 2871 | MIR30B        |     |      |     |      |     |      |
| 2707 | RPS6KA1       | 2762 | RTL1     | 2817 | GSTO1        | 2872 | CARD9         |     |      |     |      |     |      |
| 2708 | USP7          | 2763 | PFAS     | 2818 | CLIP2        | 2873 | MIR28         |     |      |     |      |     |      |
| 2709 | NPR1          | 2764 | PRKCZ    | 2819 | ALG13        | 2874 | REST          |     |      |     |      |     |      |
| 2710 | NEUROG3       | 2765 | UGT2B17  | 2820 | CPSF6        | 2875 | CADM1         |     |      |     |      |     |      |
| 2711 | NDUFA12       | 2766 | H4C11    | 2821 | NF2          | 2876 | SLC29A1       |     |      |     |      |     |      |
| 2712 | XRCC6         | 2767 | HSPA1B   | 2822 | ENTPD1       | 2877 | MAPK9         |     |      |     |      |     |      |
| 2713 | PROX1         | 2768 | PCNT     | 2823 | IMMT         | 2878 | NADK2         |     |      |     |      |     |      |
| 2714 | GPT2          | 2769 | GAD1     | 2824 | UBA5         | 2879 | DECR1         |     |      |     |      |     |      |
| 2715 | CPT1B         | 2770 | H4C14    | 2825 | NNMT         | 2880 | TREM2         |     |      |     |      |     |      |
| 2716 | DGAT2         | 2771 | ITGA6    | 2826 | S100A10      | 2881 | SMAD9         |     |      |     |      |     |      |
| 2717 | HRG           | 2772 | UCP3     | 2827 | SORD         | 2882 | RELB          |     |      |     |      |     |      |
| 2718 | BATF2         | 2773 | DOLK     | 2828 | PLAG1        | 2883 | IFT20         |     |      |     |      |     |      |
| 2719 | H2AX          | 2774 | ACAT1    | 2829 | RARG         | 2884 | RPS6          |     |      |     |      |     |      |
| 2720 | MIR148B       | 2775 | TFF3     | 2830 | HPR          | 2885 | ZFPM2         |     |      |     |      |     |      |
| 2721 | RPL36A-HNRNP2 | 2776 | PLEC     | 2831 | MAPKAPK2     | 2886 | PGK1          |     |      |     |      |     |      |
| 2722 | CEP70         | 2777 | GPX4     | 2832 | LACC1        | 2887 | MIR452        |     |      |     |      |     |      |
| 2723 | OLIG2         | 2778 | IFT81    | 2833 | AKR1B10      | 2888 | MYOG          |     |      |     |      |     |      |
| 2724 | TTC36         | 2779 | H4C9     | 2834 | PALLD        | 2889 | FLG           |     |      |     |      |     |      |
| 2725 | PDP1          | 2780 | PARK7    | 2835 | CD70         | 2890 | LRRC41        |     |      |     |      |     |      |
| 2726 | SLC29A3       | 2781 | FLNC-AS1 | 2836 | MIR137       | 2891 | PROCR         |     |      |     |      |     |      |
| 2727 | CATSPER2      | 2782 | MYH3     | 2837 | ECHS1        | 2892 | DAG1          |     |      |     |      |     |      |
| 2728 | TRIM28        | 2783 | CYP51A1  | 2838 | ZEB1         | 2893 | SERPINB2      |     |      |     |      |     |      |
| 2729 | SCTR          | 2784 | EBF3     | 2839 | IER3IP1      | 2894 | GTF2A1L       |     |      |     |      |     |      |
| 2730 | MYLK2         | 2785 | HDAC8    | 2840 | HAO1         | 2895 | STON1-GTF2A1L |     |      |     |      |     |      |
| 2731 | HOXD13        | 2786 | SSTR2    | 2841 | MMP13        | 2896 | AFM           |     |      |     |      |     |      |
| 2732 | COL18A1       | 2787 | SOST     | 2842 | MIR342       | 2897 | GTF2A1        |     |      |     |      |     |      |
| 2733 | COX4I2        | 2788 | TPD52    | 2843 | PROZ         | 2898 | STON1         |     |      |     |      |     |      |
| 2734 | MIR455        | 2789 | SRA1     | 2844 | PITRM1       | 2899 | TBP           |     |      |     |      |     |      |
| 2735 | ADH4          | 2790 | BCAP31   | 2845 | AZIN1        | 2900 | GTF2A2        |     |      |     |      |     |      |
| 2736 | ECI2          | 2791 | NDUFA2   | 2846 | DBT          | 2901 | TBPL1         |     |      |     |      |     |      |
| 2737 | WNT3          | 2792 | SCN1B    | 2847 | CDC73        | 2902 | CSNK2A1       |     |      |     |      |     |      |
| 2738 | BID           | 2793 | ZNF276   | 2848 | CCNE1        | 2903 | POLR2L        |     |      |     |      |     |      |
| 2739 | TARDBP        | 2794 | ATR      | 2849 | CYP2J2       | 2904 | ORC1          |     |      |     |      |     |      |
| 2740 | ABAT          | 2795 | CSNK2A2  | 2850 | EBF1         | 2905 | RFX1          |     |      |     |      |     |      |
| 2741 | CKM           | 2796 | H4C12    | 2851 | SLC51B       | 2906 | NAGK          |     |      |     |      |     |      |
| 2742 | NUDC          | 2797 | H4C8     | 2852 | FLT4         | 2907 | IGFBP4        |     |      |     |      |     |      |
| 2743 | AGRN          | 2798 | H4C6     | 2853 | EWSR1        | 2908 | IGFBP5        |     |      |     |      |     |      |
| 2744 | FBL           | 2799 | H4C13    | 2854 | IHH          | 2909 | SLC38A5       |     |      |     |      |     |      |
| 2745 | ALDH9A1       | 2800 | H4C5     | 2855 | MIR139       | 2910 | PFKFB3        |     |      |     |      |     |      |
| 2746 | CGA           | 2801 | H4C15    | 2856 | NDUFC2       | 2911 | ARF6          |     |      |     |      |     |      |
| 2747 | ZIC2          | 2802 | H4C4     | 2857 | GARS1        | 2912 | NT5E          |     |      |     |      |     |      |
| 2748 | NRTN          | 2803 | NOS1AP   | 2858 | AREG         | 2913 | GSDMD         |     |      |     |      |     |      |
| 2749 | RPGR          | 2804 | MAPKBP1  | 2859 | MAGEA4       |      |               |     |      |     |      |     |      |
| 2750 | MLH3          | 2805 | SLC8A1   | 2860 | LOC112042785 |      |               |     |      |     |      |     |      |
