# Supplementary material for: Identifying the Mechanism of Polygoni Cuspidati Rhizoma et Radix in Treating Acute Liver Failure Based on Network Pharmacology and Molecular Docking
Source: Hindawi journal article supplement (doi:10.1155/2022/2021066), 2022-04-08
Supplement: f1 [file 2021066.f1.zip]

**Supplementary file**

Table S3. 153 candidate target genes

| No. | Gene    | No. | Gene   | No. | Gene   | No. | Gene    | No. | Gene     |
|-----|---------|-----|--------|-----|--------|-----|---------|-----|----------|
| 1   | AKT1    | 32  | MMP1   | 63  | CDKN2A | 94  | IRF1    | 125 | SERPINE1 |
| 2   | APP     | 33  | MMP2   | 64  | CHEK2  | 95  | KCNH2   | 126 | SOD1     |
| 3   | AR      | 34  | MMP9   | 65  | CHUK   | 96  | MAOB    | 127 | SPP1     |
| 4   | BCL2L1  | 35  | NCOA2  | 66  | COL1A1 | 97  | MGAM    | 128 | STAT1    |
| 5   | BIRC5   | 36  | NFKBIA | 67  | COL3A1 | 98  | MMP3    | 129 | SULT1A1  |
| 6   | CASP3   | 37  | PCNA   | 68  | CRP    | 99  | MPO     | 130 | SULT1A3  |
| 7   | CASP7   | 38  | PIK3CG | 69  | CTSD   | 100 | MYC     | 131 | TGFB1    |
| 8   | CASP9   | 39  | PPARG  | 70  | CXCL10 | 101 | NCF1    | 132 | THBD     |
| 9   | CCNB1   | 40  | PRSS1  | 71  | CXCL2  | 102 | NFE2L2  | 133 | VCAM1    |
| 10  | CCND1   | 41  | PTGS1  | 72  | CXCL8  | 103 | NOS3    | 134 | VEGFA    |
| 11  | CD40LG  | 42  | PTGS2  | 73  | CYP1A1 | 104 | NQO1    | 135 | XDH      |
| 12  | CDK4    | 43  | RB1    | 74  | CYP1A2 | 105 | NR1I2   | 136 | SOD2     |
| 13  | CDKN1A  | 44  | RELA   | 75  | CYP1B1 | 106 | NR1I3   | 137 | SOD3     |
| 14  | DPP4    | 45  | SLC2A4 | 76  | CYP3A4 | 107 | ODC1    | 138 | HTR2A    |
| 15  | EGFR    | 46  | TNF    | 77  | E2F1   | 108 | PARP1   | 139 | OPRM1    |
| 16  | ERBB2   | 47  | TOP1   | 78  | EGF    | 109 | PLAT    | 140 | PGR      |
| 17  | GSTP1   | 48  | TOP2A  | 79  | ERBB3  | 110 | PLAU    | 141 | SLC6A4   |
| 18  | HMOX1   | 49  | TP53   | 80  | F10    | 111 | PON1    | 142 | CAT      |
| 19  | HSP90AA | 50  | TYR    | 81  | F2     | 112 | POR     | 143 | ESR1     |
| 20  | ICAM1   | 51  | ABCG2  | 82  | F3     | 113 | PPARA   | 144 | CA2      |
| 21  | IFNG    | 52  | ACACA  | 83  | F7     | 114 | PRKCA   | 145 | CDK2     |
| 22  | IL10    | 53  | ACHE   | 84  | FOS    | 115 | PRKCB   | 146 | CHEK1    |
| 23  | IL2     | 54  | ADRB2  | 85  | GJA1   | 116 | PTEN    | 147 | GSK3B    |
| 24  | IL4     | 55  | AHR    | 86  | GSTM1  | 117 | RAF1    | 148 | MAPK14   |
| 25  | IL6     | 56  | AKR1B1 | 87  | HIF1A  | 118 | RASA1   | 149 | CCNA2    |
| 26  | INSR    | 57  | ALOX5  | 88  | HK2    | 119 | RASSF1  | 150 | ESR2     |
| 27  | JUN     | 58  | BAX    | 89  | HSPB1  | 120 | RUNX1T1 | 151 | NOS2     |
| 28  | MAPK1   | 59  | BCL2   | 90  | IGF2   | 121 | RUNX2   | 152 | PTPN1    |
| 29  | MCL1    | 60  | CASP8  | 91  | IGFBP3 | 122 | RXRA    | 153 | SLC6A3   |
| 30  | MDM2    | 61  | CAV1   | 92  | IL1A   | 123 | SCN5A   |     |          |
| 31  | MET     | 62  | CCL2   | 93  | IL1B   | 124 | SELE    |     |          |
