# Supplementary material for: Identifying the Mechanism of Polygoni Cuspidati Rhizoma et Radix in Treating Acute Liver Failure Based on Network Pharmacology and Molecular Docking
Source: Hindawi journal article supplement (doi:10.1155/2022/2021066), 2022-04-08
Supplement: f1 [file 2021066.f1.zip]

# Supplementary file

Table S1. 200 target genes interacting with the 10 active components of Polygoni Cuspidati Rhizoma et Radix

| No. | Gene    | No. | Gene    | No. | Gene   | No. | Gene     | No. | Gene   |
|-----|---------|-----|---------|-----|--------|-----|----------|-----|--------|
| 1   | ADCY2   | 41  | PIK3CG  | 81  | CXCL8  | 121 | NCF1     | 161 | VEGFA  |
| 2   | AKT1    | 42  | PPARG   | 82  | CYP1A1 | 122 | NFE2L2   | 162 | XDH    |
| 3   | APP     | 43  | PRSS1   | 83  | CYP1A2 | 123 | NKX3-1   | 163 | SOD2   |
| 4   | AR      | 44  | PTGES   | 84  | CYP1B1 | 124 | NOS1,2,3 | 164 | SOD3   |
| 5   | BCL2L1  | 45  | PTGS1   | 85  | CYP3A4 | 125 | NOS3     | 165 | TOP2B  |
| 6   | BIRC4   | 46  | PTGS2   | 86  | DCAF5  | 126 | NPEPPS   | 166 | ADRA1A |
| 7   | BIRC5   | 47  | RB1     | 87  | DIO1   | 127 | NQO1     | 167 | ADRA1B |
| 8   | CASP3   | 48  | RELA    | 88  | DUOX2  | 128 | NR1I2    | 168 | CHRM1  |
| 9   | CASP7   | 49  | SLC2A4  | 89  | E2F1   | 129 | NR1I3    | 169 | CHRM2  |
| 10  | CASP9   | 50  | TNF     | 90  | E2F2   | 130 | ODC1     | 170 | CHRM3  |
| 11  | CCNB1   | 51  | TOP1    | 91  | EGF    | 131 | PARP1    | 171 | CHRM4  |
| 12  | CCND1   | 52  | TOP2A   | 92  | EIF6   | 132 | PCOLCE   | 172 | CHRNA2 |
| 13  | CD40LG  | 53  | TP53    | 93  | ELK1   | 133 | PLAT     | 173 | DRD1   |
| 14  | CDK4    | 54  | TYR     | 94  | ERBB3  | 134 | PLAU     | 174 | GABRA2 |
| 15  | CDKN1A  | 55  | ISP90AB | 95  | F10    | 135 | PON1     | 175 | GABRA3 |
| 16  | DPP4    | 56  | ABCG2   | 96  | F2     | 136 | POR      | 176 | GABRA5 |
| 17  | EGFR    | 57  | ACACA   | 97  | F3     | 137 | PPARA    | 177 | HTR2A  |
| 18  | ERBB2   | 58  | ACHE    | 98  | F7     | 138 | PPARD    | 178 | MAP2   |
| 19  | GSTP1   | 59  | ACP3    | 99  | FOS    | 139 | PRKCA    | 179 | OPRM1  |
| 20  | HMOX1   | 60  | ADRB2   | 100 | GABRA1 | 140 | PRKCB    | 180 | PDE3A  |
| 21  | ISP90AA | 61  | AHR     | 101 | GJA1   | 141 | PSMD3    | 181 | PGR    |
| 22  | ICAM1   | 62  | AHSA1   | 102 | GSTM1  | 142 | PTEN     | 182 | SLC6A4 |
| 23  | IFNG    | 63  | AKR1B1  | 103 | GSTM2  | 143 | PTGER3   | 183 | CALM1  |
| 24  | IL10    | 64  | ALOX5   | 104 | HAS2   | 144 | RAF1     | 184 | CAT    |
| 25  | IL2     | 65  | BAX     | 105 | HERC5  | 145 | RASA1    | 185 | ESR1   |
| 26  | IL4     | 66  | BCL2    | 106 | HIF1A  | 146 | RASSF1   | 186 | CA2    |
| 27  | IL6     | 67  | CASP8   | 107 | HK2    | 147 | RUNX1T1  | 187 | CDK2   |
| 28  | INSR    | 68  | CAV1    | 108 | HSF1   | 148 | RUNX2    | 188 | CHEK1  |
| 29  | JUN     | 69  | CCL2    | 109 | HSPB1  | 149 | RXRA     | 189 | GSK3B  |
| 30  | MAPK1   | 70  | CDKN2A  | 110 | IGF2   | 150 | SCN5A    | 190 | MAPK14 |
| 31  | MCL1    | 71  | CHEK2   | 111 | IGFBP3 | 151 | SELE     | 191 | PKIA   |
| 32  | MDM2    | 72  | CHUK    | 112 | IL1A   | 152 | SERPINE1 | 192 | ADRA2B |
| 33  | MET     | 73  | CLDN4   | 113 | IL1B   | 153 | SOD1     | 193 | CCNA2  |
| 34  | MMP1    | 74  | COL1A1  | 114 | IRF1   | 154 | SPP1     | 194 | ESR2   |
| 35  | MMP2    | 75  | COL3A1  | 115 | KCNH2  | 155 | STAT1    | 195 | GRIA2  |
| 36  | MMP9    | 76  | CRP     | 116 | MAOB   | 156 | SULT1A1  | 196 | NOS2   |
| 37  | NCOA2   | 77  | CTSD    | 117 | MGAM   | 157 | SULT1A3  | 197 | OPRD1  |
| 38  | NFKBIA  | 78  | CXCL10  | 118 | MMP3   | 158 | TGFB1    | 198 | PTPN1  |
| 39  | NUF2    | 79  | CXCL11  | 119 | MPO    | 159 | THBD     | 199 | SLC6A2 |
| 40  | PCNA    | 80  | CXCL2   | 120 | MYC    | 160 | VCAM1    | 200 | SLC6A3 |
